# Supplementary material
Source: PubMed Central journal article supplement (PMC8876311)
Supplement: NIHMS1778600-supplement-Supplemental.pdf [file NIHMS1778600-supplement-Supplemental.pdf]

## SUPPLEMENTARY MATERIAL

### Supplemental Methods

**Table S1.** 23 genes known to cause isolated CAKUT in humans, if mutated.

**Table S2.** 16 genes known to cause syndromic CAKUT in humans, if mutated.

**Table S3.** 135 genes for syndromes with facultative CAKUT features in humans.

**Table S4.** 46 renal cystic ciliopathy genes in which variants may cause phenocopies of CAKUT.

**Table S5.** Phenotypic details for 24 families in whom reverse phenotyping confirmed a likely deleterious variant as causative.

**Table S6.** Detailed information on phenotype and genotype for 83 families with likely causative variants in genes known to cause isolated or syndromic CAKUT.

**Table S7.** 32 Families with isolated CAKUT and likely non-causative variants in candidate genes for syndromes with facultative CAKUT.

**Table S8.** Genotype and phenotype information for 10 families with likely causative variants in genes causing a phenocopy of CAKUT.

### References

## **SUPPLEMENTAL METHODS**

### **Exome sequencing and variant calling**

Genomic DNA was isolated from whole blood or saliva samples of all enrolled individuals according to local protocols. Generation of ES data from genomic DNA was performed at the Yale Center for Mendelian Genomics using Agilent SureSelect™ human exome capture arrays (Agilent Technologies, California, USA), followed by next generation sequencing on an Illumina HiSeq™ sequencing platform (Illumina, California, USA). Sequencing reads were mapped to the human reference genome assembly (NCBI build GRCh37/hg19) using CLC Biomedical Genomics Workbench™ (version 5.0.1) software (QIAGEN Aarhus A/S, Aarhus, Denmark). From the called variants, those with minor allele frequencies >1% in dbSNP<sup>1</sup> (version 147) or in the 1,000 Genomes Project<sup>2</sup> (1,094 subjects of various ethnicities; May 2011 data release) databases were excluded as they were considered unlikely to be deleterious, as previously described<sup>3</sup>. Synonymous and intronic variants located outside of splice sites were excluded, leaving non-synonymous and splice site variants for further analysis.

### **Homozygosity mapping**

Homozygosity mapping data were generated from ES data as previously described<sup>4</sup> to allow identification of individuals with significant amounts of homozygosity ( $\geq 60$  Mb), and to enable mapping of identified biallelic variants to homozygous regions<sup>5</sup>.

### **Family analysis**

In families with CAKUT, who had more than one individual enrolled in this study, segregation analysis was performed according to reported affected status and relationship. Identified variants in the index individual were examined for segregation within the relatives using CLC Biomedical Genomics Workbench™ (version 5.0.1) software (QIAGEN Aarhus A/S, Aarhus, Denmark). For multiple affected individuals within the family, only segregating variants were retained. In case of biallelic heterozygous variants, only those inherited *in trans* (assuming compound heterozygous recessive mode of inheritance) were retained.

### **Variant analysis in known human CAKUT genes**

Following variant calling and application of the above-described filtering steps, ES data was examined for potentially deleterious variants in any of the 23 known isolated CAKUT genes (**Table S1**) and the 16 known “syndromic” CAKUT genes (**Table S2**), followed by an additional analysis for variants in the 135 genes, in which variants are known to cause syndromes with facultative CAKUT, if mutated (**Table S3**), and in 46 genes known to cause, if mutated, renal cystic ciliopathies as frequent phenocopies of CAKUT (**Table S4**). In order to assess the deleteriousness of the remaining variants, manual analysis and annotation was performed using the in-silico prediction programs Alamut Visual™ version 2.15 (Sophia Genetics, Massachusetts, USA), Sorting Intolerant from Tolerant (SIFT)<sup>6</sup>, MutationTaster<sup>7</sup>, and PolyPhen-2<sup>8</sup>, the population databases Exome Variant Server (EVS) and gnomAD<sup>9</sup>, and the variant databases HGMD® Professional 2020.3<sup>10</sup> (QIAGEN Aarhus A/S, Aarhus, Denmark) and ClinVar<sup>11</sup>. Amino acid conservation of the encoded protein among orthologues across phylogeny was analyzed using Ensembl Genome Browser (release 102)<sup>12</sup> and Clustal Omega<sup>13</sup>. Variant classification published by the American College of Medical Genetics and Genomic (ACMG) and the Association for Molecular Pathology (AMP)<sup>14</sup> was calculated using VarSome<sup>15</sup>. All database queries were last updated on December 28, 2020 and reflect this date’s status. Final assessment of the identified variants was made using our previously published criteria<sup>4</sup>.

Remaining variants were confirmed by Sanger sequencing according to local protocols in original patient DNA, if available and not otherwise specified. Segregation analysis was performed using all available DNA from relatives, even if not included in ES data generation.

**Table S1. 23 genes known to cause isolated CAKUT in humans, if mutated.**

Genes are listed by mode of inheritance and alphabetically by gene symbol.

| Gene          | Encoded protein                                                           | Reference                                                                                                   | MOI | OMIM Gene number |
|---------------|---------------------------------------------------------------------------|-------------------------------------------------------------------------------------------------------------|-----|------------------|
| <b>ACE</b>    | Angiotensin I-converting enzyme                                           | Gribouval <i>Nat Genet</i> 37:964, 2005 <sup>16</sup>                                                       | AR  | 106180           |
| <b>AGT</b>    | Angiotensinogen                                                           | Gribouval <i>Nat Genet</i> 37:964, 2005 <sup>16</sup>                                                       | AR  | 106150           |
| <b>AGTR1</b>  | Angiotensin II receptor, type 1                                           | Gribouval <i>Nat Genet</i> 37:964, 2005 <sup>16</sup>                                                       | AR  | 106165           |
| <b>FGF20</b>  | Fibroblast growth factor 20                                               | Barak <i>Dev Cell</i> 22:1191, 2012 <sup>17</sup>                                                           | AR  | 605558           |
| <b>ITGA8</b>  | Integrin $\alpha$ 8                                                       | Humbert <i>Am J Hum Genet</i> 189:1260, 2014 <sup>18</sup>                                                  | AR  | 604063           |
| <b>LRIG2</b>  | Leucine-rich repeats-and immunoglobulin-like domains-containing protein 2 | Stuart <i>Am J Hum Genet</i> 92:259, 2013 <sup>19</sup>                                                     | AR  | 608869           |
| <b>REN</b>    | Renin                                                                     | Gribouval <i>Nat Genet</i> 37:964, 2005 <sup>16</sup>                                                       | AR  | 179820           |
| <b>TRAP1</b>  | Heat-shock protein 75 (also known as TNF receptor-associated protein 1)   | Saisawat <i>Kidney Int</i> 85:880, 2014 <sup>20</sup>                                                       | AR  | 606219           |
| <b>BNC2</b>   | Basonuclin 2                                                              | Kolvenbach <i>Am J Hum Genet</i> 104:994, 2019 <sup>21</sup>                                                | AD  | 608669           |
| <b>CRKL</b>   | CRK Like Proto-Oncogene, adaptor protein                                  | Lopez-Rivera <i>N Engl J Med</i> 376:742, 2017 <sup>22</sup>                                                | AD  | 602007           |
| <b>DSTYK</b>  | Dual serine/threonine and tyrosine protein kinase                         | Sanna-Cherchi <i>N Engl J Med</i> 369:621, 2013 <sup>23</sup>                                               | AD  | 612666           |
| <b>GREB1L</b> | Growth regulation by estrogen in breast cancer 1-like                     | Brophy <i>Genetics</i> 207:215, 2017 <sup>24</sup>                                                          | AD  | 617782           |
| <b>MUC1</b>   | Mucin 1                                                                   | Kirby <i>Nat Genet</i> 45:299, 2013 <sup>25</sup>                                                           | AD  | 158340           |
| <b>MYOCD</b>  | Myocardin                                                                 | Houweling <i>J Clin Invest</i> 129:5374, 2019 <sup>26</sup>                                                 | AD  | 606127           |
| <b>NRIP1</b>  | Nuclear receptor interacting protein 1                                    | Vivante <i>J Am Soc Nephrol</i> 2017 28:2364, 2017 <sup>27</sup>                                            | AD  | 602490           |
| <b>ROBO2</b>  | Roundabout, axon guidance receptor, homolog 2 ( <i>Drosophila</i> )       | Hwang <i>Hum Genet</i> 134:905, 2015 <sup>28</sup> ;<br>Lu <i>Am J Hum Genet</i> 80:616, 2007 <sup>29</sup> | AD  | 602431           |
| <b>SIX2</b>   | SIX homeobox 2                                                            | Weber <i>J Am Soc Nephrol</i> 19:891, 2008 <sup>30</sup>                                                    | AD  | 604994           |
| <b>SLIT2</b>  | Slit homolog 2                                                            | Hwang <i>Hum Genet</i> 134:905, 2015 <sup>28</sup>                                                          | AD  | 603746           |
| <b>SOX17</b>  | Transcription factor SIX-17                                               | Gimelli <i>Hum Mut</i> 31:1352, 2010 <sup>31</sup>                                                          | AD  | 610928           |
| <b>SRGAP1</b> | SLIT-ROBO Rho GTPase activating protein 1                                 | Hwang <i>Hum Genet</i> 134:905, 2015 <sup>28</sup>                                                          | AD  | 606523           |
| <b>TBX18</b>  | T-Box transcription factor                                                | Vivante <i>Am J Hum Genet</i> 97:291, 2015 <sup>32</sup>                                                    | AD  | 604613           |
| <b>TNXB</b>   | Tenascin XB                                                               | Gbadegesin <i>J Am Soc Nephrol</i> 24:1313, 2013 <sup>33</sup>                                              | AD  | 600985           |
| <b>UPK3A</b>  | Uroplakin 3A                                                              | Jenkins <i>J Am Soc Nephrol</i> 16:2141, 2005 <sup>34</sup>                                                 | AD  | 611559           |

AD, autosomal dominant; AR, autosomal recessive; MOI, mode of inheritance; OMIM, Online Mendelian Inheritance in Men.

**Table S2. 16 genes known to cause syndromic CAKUT in humans, if mutated.**

Genes in which variants may result in a CAKUT phenotype that is accompanied by extrarenal features in ≥50% of reported cases. Genes are listed by mode of inheritance and alphabetically by gene symbol.

| Gene          | Encoded protein                                                      | Reference                                                                                                                                                                                 | MOI | OMIM Gene number | Phenotypes reported in HGMD <sup>a</sup> |                            |                               |                       |
|---------------|----------------------------------------------------------------------|-------------------------------------------------------------------------------------------------------------------------------------------------------------------------------------------|-----|------------------|------------------------------------------|----------------------------|-------------------------------|-----------------------|
|               |                                                                      |                                                                                                                                                                                           |     |                  | Total cases                              | CAKUT involvement reported | No CAKUT involvement reported | CAKUT involvement [%] |
| <b>FRAS1</b>  | Extracellular matrix protein FRAS1                                   | Kohl <i>J Am Soc Nephrol</i> 25:1917, 2014 <sup>35</sup>                                                                                                                                  | AR  | 607830           | 82                                       | 70 <sup>b</sup>            | 12                            | 85                    |
| <b>FREM1</b>  | FRAS1 related extracellular matrix protein 1                         | Kohl <i>J Am Soc Nephrol</i> 25:1917, 2014 <sup>35</sup>                                                                                                                                  | AR  | 608944           | 37                                       | 11                         | 26                            | 30 <sup>c</sup>       |
| <b>FREM2</b>  | FRAS1 related extracellular matrix protein 2                         | Kohl <i>J Am Soc Nephrol</i> 25:1917, 2014 <sup>35</sup>                                                                                                                                  | AR  | 608945           | 45                                       | 29                         | 16                            | 64                    |
| <b>GRIP1</b>  | Glutamate receptor interacting protein 1                             | Kohl <i>J Am Soc Nephrol</i> 25:1917, 2014 <sup>35</sup>                                                                                                                                  | AR  | 604597           | 18                                       | 9                          | 9                             | 50                    |
| <b>HPSE2</b>  | Heparanase 2 (Inactive)                                              | Bulum <i>Nephron</i> 130:54, 2015 <sup>37</sup>                                                                                                                                           | AR  | 613469           | 15                                       | 15                         | 0                             | 100                   |
| <b>EYA1</b>   | Eyes absent homolog 1                                                | Abdelhak <i>Nat Genet</i> 15:157, 1997 <sup>38</sup>                                                                                                                                      | AD  | 601653           | 240                                      | 211                        | 29                            | 88                    |
| <b>GATA3</b>  | GATA binding protein 3                                               | Pandolfi <i>Nat Genet</i> 11:40, 1995 <sup>39</sup> ;<br>Van Esch <i>Nature</i> 406:419, 2000 <sup>40</sup>                                                                               | AD  | 131320           | 118                                      | 89                         | 29                            | 75                    |
| <b>HNF1B</b>  | HNF homeobox B                                                       | Lindner <i>Hum Mol Genet</i> 24:263, 1999 <sup>41</sup>                                                                                                                                   | AD  | 189907           | 301                                      | 235                        | 66                            | 78                    |
| <b>PAX2</b>   | Paired box 2                                                         | Sanyanusin <i>Hum Mol Genet</i> 4:2183, 1995 <sup>42</sup>                                                                                                                                | AD  | 167409           | 123                                      | 112                        | 11                            | 91                    |
| <b>PBX1</b>   | PBX homeobox 1                                                       | Heidet <i>J Am Soc Nephrol</i> 28:2901, 2017 <sup>43</sup>                                                                                                                                | AD  | 176310           | 37                                       | 29                         | 8                             | 78                    |
| <b>SALL1</b>  | Sal-like protein 1 (also known as spalt-like transcription factor 1) | Kohlhase <i>Nat Genet</i> 18:81, 1998 <sup>44</sup>                                                                                                                                       | AD  | 602218           | 101                                      | 96                         | 5                             | 95                    |
| <b>SIX1</b>   | SIX homeobox 1                                                       | Ruf <i>Proc Nat Acad Sci</i> 101:8090, 2004 <sup>45</sup>                                                                                                                                 | AD  | 601205           | 22                                       | 15                         | 7                             | 68                    |
| <b>SIX5</b>   | SIX homeobox 5                                                       | Hoskins <i>Am J Hum Genet</i> 80:800, 2007 <sup>46</sup>                                                                                                                                  | AD  | 600963           | 12                                       | 11                         | 1                             | 92                    |
| <b>WNT4</b>   | Protein Wnt-4                                                        | Biason-Lauber <i>N Engl J Med</i> 351:792, 2004 <sup>47</sup> ;<br>Mandel <i>Am J Hum Genet</i> 82:39, 2008 <sup>48</sup> ;<br>Vivante <i>J Am Soc Nephrol</i> 24:550, 2013 <sup>49</sup> | AD  | 603490           | 9                                        | 7                          | 2                             | 78                    |
| <b>ZMYM2</b>  | Zink finger, MYM-type 2                                              | Connaughton <i>Am J Hum Genet</i> 107:727, 2020 <sup>50</sup>                                                                                                                             | AD  | 602221           | 17                                       | 13                         | 4                             | 76                    |
| <b>FAM58A</b> | Family with sequence similarity 58 member A                          | Green <i>J Med Genet</i> 33:594, 1996 <sup>51</sup> ;<br>Unger <i>Nat Genet</i> 40:287, 2008 <sup>52</sup>                                                                                | XL  | 300708           | 11                                       | 11                         | 0                             | 100                   |

**AD**, autosomal dominant; **AR**, autosomal recessive; **MOI**, mode of inheritance; **OMIM**, Online Mendelian Inheritance in Men; **XL**, X-linked.

<sup>a</sup> The database HGMD<sup>®</sup> Professional 2020.3 was queried for the phenotypes reported for variants in the corresponding genes. Based on the available details, 'CAKUT involvement reported' was assumed when any CAKUT phenotype (see **Methods** for definitions) or renal involvement was specifically mentioned, and the percentage from total cases reported in this database was calculated. Last update from the database on February 25, 2021.

<sup>b</sup> For the genes causative of Fraser syndrome, all cases of reported Fraser syndrome without further specification were assumed to exhibit CAKUT involvement, since urogenital malformations are deemed a major diagnostic criterion (Van Haelst *Am J Med Genet A* 143A:3194, 2007<sup>36</sup>).

<sup>c</sup> This gene is listed here despite the percentage being below our 50% cutoff because it belongs to the Fraser syndrome complex, and hypomorphic variants have been shown to cause isolated CAKUT (Kohl *J Am Soc Nephrol* 25:1917, 2014<sup>35</sup>).

**Table S3. 135 genes for syndromes with facultative CAKUT features in humans.**

Genes in which variants typically result in a multi-organ syndrome with facultative CAKUT features in less than 50% of reported cases. Genes are listed by mode of inheritance and alphabetically by gene symbol.

| Gene           | Encoded protein                                                  | Reference                                                         | MOI | OMIM Gene number | Phenotypes reported in HGMD <sup>® a</sup> |                            |                               |                       |
|----------------|------------------------------------------------------------------|-------------------------------------------------------------------|-----|------------------|--------------------------------------------|----------------------------|-------------------------------|-----------------------|
|                |                                                                  |                                                                   |     |                  | Total cases                                | CAKUT involvement reported | No CAKUT involvement reported | CAKUT involvement [%] |
| <b>B3GALTL</b> | Beta 3-glucosyltransferase                                       | Lesnik Oberstein <i>Am J Hum Genet</i> 79:562, 2006 <sup>53</sup> | AR  | 610308           | 16                                         | 0                          | 16                            | 0                     |
| <b>BMPER</b>   | Bone morphogenetic protein-binding endothelial regulator protein | Greenbaum <i>Eur J Med Genet</i> 62:167, 2019 <sup>54</sup>       | AR  | 608699           | 24                                         | 0                          | 24                            | 0                     |
| <b>BSCL2</b>   | BSCL2, Seipin lipid droplet biogenesis associated                | Haghighi <i>Clin Genet</i> 89: 434, 2016 <sup>55</sup>            | AR  | 606158           | 58                                         | 0                          | 58                            | 0                     |
| <b>CCBE1</b>   | Collagen and calcium-binding EGF domain-containing protein 1     | Van Balkom <i>Am J Med Genet</i> 112:412, 2002 <sup>56</sup>      | AR  | 612753           | 16                                         | 0                          | 16                            | 0                     |
| <b>CD151</b>   | CD151 molecule (Raph blood group)                                | Karamatic <i>Blood</i> 104:2217, 2004 <sup>57</sup>               | AR  | 602243           | 7                                          | 0                          | 7                             | 0                     |
| <b>CENPF</b>   | Centromeric protein F                                            | Filges <i>Hum Mutat</i> 37:359, 2016 <sup>58</sup>                | AR  | 600236           | 22                                         | 1                          | 21                            | 5                     |
| <b>CEP55</b>   | Centrosomal protein, 55-kD                                       | Frosk <i>J Med Genet</i> 54:490, 2017 <sup>59</sup>               | AR  | 610000           | 6                                          | 3                          | 3                             | 50 <sup>b</sup>       |
| <b>CHRM3</b>   | Muscarinic acetylcholine receptor M3                             | Weber <i>Am J Hum Genet</i> 19:634, 2011 <sup>60</sup>            | AR  | 118494           | 10                                         | 2                          | 8                             | 20                    |
| <b>CHRNA3</b>  | Cholinergic receptor nicotinic gamma subunit                     | Vogt <i>J Med Genet</i> 49:21, 2012 <sup>61</sup>                 | AR  | 100730           | 42                                         | 0                          | 42                            | 0                     |
| <b>CISD2</b>   | CDGSH iron sulfur domain 2                                       | Amr <i>Am J Hum Genet</i> 81:673, 2007 <sup>62</sup>              | AR  | 611507           | 7                                          | 0                          | 7                             | 0                     |
| <b>COL18A1</b> | Collagen, type XVIII, alpha-1                                    | Caglayan <i>Pediatr Neurol</i> 51:806, 2014 <sup>63</sup>         | AR  | 120328           | 50                                         | 0                          | 50                            | 0                     |
| <b>CTU2</b>    | Cytosolic thioridylase, subunit 2                                | Shaheen <i>Am J Med Genet</i> 170:3222, 2016 <sup>64</sup>        | AR  | 617057           | 6                                          | 4                          | 2                             | 67 <sup>b</sup>       |
| <b>DHCR7</b>   | 7-Dehydrocholesterol reductase                                   | Löffler <i>Am J Med Genet</i> 95:174, 2000 <sup>65</sup>          | AR  | 602858           | 226                                        | 0                          | 226                           | 0                     |
| <b>DIS3L2</b>  | DIS3 like 3'-5' exoribonuclease 2                                | Astuti <i>Nat Genet</i> 44:277, 2012 <sup>66</sup>                | AR  | 614184           | 21                                         | 0                          | 21                            | 0                     |
| <b>DYNC2H1</b> | Dynein cytoplasmic 2 heavy chain 1                               | Baujart <i>J Med Genet</i> 50:91, 2013 <sup>67</sup>              | AR  | 603297           | 233                                        | 1                          | 232                           | 0                     |
| <b>EMG1</b>    | EMG1, N1-specific pseudouridine methyltransferase                | Armistead <i>Am J Hum Genet</i> 84:728, 2009 <sup>68</sup>        | AR  | 611531           | 1                                          | 0                          | 1                             | 0                     |
| <b>ERCC8</b>   | Excision repair cross-complementing, group 8                     | Bertola <i>J Hum Genet</i> 51:701, 2006 <sup>69</sup>             | AR  | 609412           | 75                                         | 0                          | 75                            | 0                     |
| <b>ESCO2</b>   | Establishment of sister chromatid cohesion N-acetyltransferase 2 | Vega <i>J Med Genet</i> 47:30, 2010 <sup>70</sup>                 | AR  | 609353           | 33                                         | 0                          | 33                            | 0                     |
| <b>ETFA</b>    | Electron transfer flavoprotein alpha subunit                     | Lehnert <i>Eur J Pediatr</i> 139:56, 1982 <sup>71</sup>           | AR  | 608053           | 39                                         | 0                          | 39                            | 0                     |
| <b>ETFB</b>    | Electron transfer flavoprotein beta subunit                      | Lehnert <i>Eur J Pediatr</i> 139:56, 1982 <sup>71</sup>           | AR  | 130410           | 19                                         | 0                          | 19                            | 0                     |
| <b>ETFDH</b>   | Electron transfer flavoprotein dehydrogenase                     | Lehnert <i>Eur J Pediatr</i> 139:56, 1982 <sup>71</sup>           | AR  | 231675           | 236                                        | 0                          | 236                           | 0                     |
| <b>FANCA</b>   | Fanconi anemia complementation group A                           | Joenje <i>Nat Rev Genet</i> 2:466, 2001 <sup>72</sup>             | AR  | 607139           | 782                                        | 1                          | 781                           | 0                     |
| <b>FANCD2</b>  | Fanconi anemia complementation group D2                          | Kalb <i>Am J Hum Genet</i> 80:895, 2007 <sup>73</sup>             | AR  | 613984           | 89                                         | 1                          | 88                            | 1                     |
| <b>FANCE</b>   | Fanconi anemia complementation group E                           | Wegner <i>Clin Genet</i> 50:479, 1996 <sup>74</sup>               | AR  | 613976           | 25                                         | 0                          | 25                            | 0                     |
| <b>FANCI</b>   | Fanconi anemia complementation group I                           | Savage <i>Am J Med Genet A</i> 170A:386, 2015 <sup>75</sup>       | AR  | 611360           | 75                                         | 4                          | 71                            | 5                     |
| <b>FANCL</b>   | Fanconi anemia complementation group L                           | Vetro <i>Hum Mutat</i> 36:562, 2015 <sup>76</sup>                 | AR  | 608111           | 35                                         | 0                          | 35                            | 0                     |
| <b>FAT4</b>    | FAT atypical cadherin 4                                          | Alders <i>Hum Genet</i> 133:1161, 2014 <sup>77</sup>              | AR  | 612411           | 45                                         | 8                          | 37                            | 18                    |
| <b>FIBP</b>    | Fibroblast growth factor, acidic, intracellular binding protein  | Thauvin-Robinet <i>Clin Genet</i> 89:e1-4, 2016 <sup>78</sup>     | AR  | 608296           | 2                                          | 1                          | 1                             | 50 <sup>b</sup>       |

| Gene            | Encoded protein                                         | Reference                                                                      | MOI | OMIM Gene number | Phenotypes reported in HGMD <sup>a</sup> |                            |                               |                       |
|-----------------|---------------------------------------------------------|--------------------------------------------------------------------------------|-----|------------------|------------------------------------------|----------------------------|-------------------------------|-----------------------|
|                 |                                                         |                                                                                |     |                  | Total cases                              | CAKUT involvement reported | No CAKUT involvement reported | CAKUT involvement [%] |
| <b>HAAO</b>     | 3-Hydroxyanthranilate 3,4-dioxygenase                   | Shi <i>N Engl J Med</i> 377:544, 2017 <sup>79</sup>                            | AR  | 604521           | 2                                        | 0                          | 2                             | 0                     |
| <b>HYLS1</b>    | HYLS1, centriolar and ciliogenesis associated           | Paetau <i>J Neuropathol Exp Neurol</i> 67:750, 2008 <sup>80</sup>              | AR  | 610693           | 2                                        | 0                          | 2                             | 0                     |
| <b>ICK</b>      | Intestinal cell kinase                                  | Lahiry <i>Am J Hum Genet</i> 84:134, 2009 <sup>81</sup>                        | AR  | 612325           | 18                                       | 0                          | 18                            | 0                     |
| <b>ITGA3</b>    | Integrin subunit alpha 3                                | Yalcin <i>Hum Mol Genet</i> 24:3679, 2015 <sup>82</sup>                        | AR  | 605025           | 11                                       | 0                          | 11                            | 0                     |
| <b>JAM3</b>     | Junctional adhesion molecule 3                          | Mochida <i>Am J Hum Genet</i> 87:882, 2010 <sup>83</sup>                       | AR  | 606871           | 6                                        | 0                          | 6                             | 0                     |
| <b>KYNU</b>     | Kynureninase                                            | Shi <i>N Engl J Med</i> 377:544, 2017 <sup>79</sup>                            | AR  | 605197           | 12                                       | 1                          | 11                            | 8                     |
| <b>LMNA</b>     | Lamin A/C                                               | Klupa <i>Endocrine</i> 36:518, 2009 <sup>84</sup>                              | AR  | 150330           | 689                                      | 7                          | 682                           | 1                     |
| <b>LRP2</b>     | LDL receptor related protein 2                          | Kantarci <i>Nat Genet</i> 39:957, 2007 <sup>85</sup>                           | AR  | 600073           | 83                                       | 7                          | 76                            | 8                     |
| <b>LRP4</b>     | LDL receptor related protein 4                          | Li <i>Am J Hum Genet</i> 86:696, 2010 <sup>86</sup>                            | AR  | 604270           | 39                                       | 3                          | 36                            | 8                     |
| <b>NADSYN1</b>  | NAD synthetase 1                                        | Szot <i>Am J Hum Genet</i> 106:129, 2020 <sup>87</sup>                         | AR  | 608285           | 6                                        | 0                          | 6                             | 0                     |
| <b>NCAPG2</b>   | Non-SMC condensin II complex subunit G2                 | Khan <i>Am J Hum Genet</i> 104:94, 2019 <sup>88</sup>                          | AR  | 608532           | 4                                        | 0                          | 4                             | 0                     |
| <b>PEX1</b>     | Peroxisomal biogenesis factor 1                         | Crane <i>Hum Mutat</i> 26:167, 2005 <sup>89</sup>                              | AR  | 602136           | 152                                      | 0                          | 152                           | 0                     |
| <b>PEX5</b>     | Peroxisomal biogenesis factor 5                         | Sundaram <i>Nat Clin Pract Gastroenterol Hepatol</i> 5:456, 2008 <sup>90</sup> | AR  | 600414           | 14                                       | 0                          | 14                            | 0                     |
| <b>PIGL</b>     | Phosphatidylinositol glycan anchor biosynthesis class L | Schnur <i>Am J Med Genet</i> 72:24, 1997 <sup>91</sup>                         | AR  | 605947           | 11                                       | 0                          | 11                            | 0                     |
| <b>PIGN</b>     | Phosphatidylinositol glycan anchor biosynthesis class N | Ohba <i>Neurogenetics</i> 15:85, 2014 <sup>92</sup>                            | AR  | 606097           | 60                                       | 0                          | 60                            | 0                     |
| <b>PIGO</b>     | Phosphatidylinositol glycan anchor biosynthesis class O | Krawitz <i>Am J Hum Genet</i> 91:146, 2012 <sup>93</sup>                       | AR  | 614730           | 21                                       | 0                          | 21                            | 0                     |
| <b>PIGT</b>     | Phosphatidylinositol glycan anchor biosynthesis class T | Nakashima <i>Neurogenetics</i> 15:193, 2014 <sup>94</sup>                      | AR  | 610272           | 21                                       | 0                          | 21                            | 0                     |
| <b>PIGV</b>     | Phosphatidylinositol glycan anchor biosynthesis class V | Horn <i>Eur J Hum Genet</i> 22:762, 2014 <sup>95</sup>                         | AR  | 610274           | 16                                       | 0                          | 16                            | 0                     |
| <b>PIGY</b>     | Phosphatidylinositol glycan anchor biosynthesis class Y | Ilkovski <i>Hum Mol Genet</i> 24:6146, 2015 <sup>96</sup>                      | AR  | 610662           | 2                                        | 0                          | 2                             | 0                     |
| <b>PMM2</b>     | Phosphomannomutase 2                                    | Horslen <i>Arch Dis Child</i> 66:1027, 1991 <sup>97</sup>                      | AR  | 601785           | 133                                      | 1                          | 132                           | 1                     |
| <b>POC1A</b>    | POC1 centriolar protein                                 | Shaheen <i>Am J Hum Genet</i> 91:330, 2012 <sup>98</sup>                       | AR  | 614783           | 12                                       | 0                          | 12                            | 0                     |
| <b>RAB23</b>    | RAS-associated protein RAB23                            | Alessandri <i>Am J Med Genet A</i> 152A:982, 2010 <sup>99</sup>                | AR  | 606144           | 17                                       | 0                          | 17                            | 0                     |
| <b>RBM8A</b>    | RNA-binding motif protein 8A                            | Skorka <i>Genet Couns</i> 16:377, 2005 <sup>100</sup>                          | AR  | 605313           | 21                                       | 0                          | 21                            | 0                     |
| <b>RECQL4</b>   | RecQ Like Helicase 4                                    | Siitonen <i>Eur J Hum Genet</i> 17:151, 2009 <sup>101</sup>                    | AR  | 603780           | 165                                      | 0                          | 165                           | 0                     |
| <b>ROR2</b>     | Receptor tyrosine kinase like orphan receptor 2         | Wiens <i>Clin Genet</i> 37:481, 1990 <sup>102</sup>                            | AR  | 602337           | 51                                       | 3                          | 48                            | 6                     |
| <b>STRA6</b>    | Stimulated by retinoic acid 6                           | Golzio <i>Am J Hum Genet</i> 80:1179, 2007 <sup>103</sup>                      | AR  | 610745           | 36                                       | 0                          | 36                            | 0                     |
| <b>TMCO1</b>    | Transmembrane and coiled-coil domains 1                 | Xin <i>Proc Natl Acad Sci U S A</i> 107:258, 2010 <sup>104</sup>               | AR  | 614123           | 7                                        | 0                          | 7                             | 0                     |
| <b>UBR1</b>     | Ubiquitin protein ligase E3 component N-recognin 1      | Vanlieferinghen <i>Genet Couns</i> 14:105, 2003 <sup>105</sup>                 | AR  | 605981           | 83                                       | 0                          | 83                            | 0                     |
| <b>WFS1</b>     | Wolfram ER transmembrane glycoprotein                   | Salih <i>Acta Paediatr Scand</i> 80:567, 1991 <sup>106</sup>                   | AR  | 606201           | 454                                      | 4                          | 450                           | 1                     |
| <b>WNT3</b>     | Wnt family member 3                                     | Niemann <i>Am J Hum Genet</i> 74:558, 2004 <sup>107</sup>                      | AR  | 165330           | 2                                        | 1                          | 1                             | 50 <sup>b</sup>       |
| <b>ZMPSTE24</b> | Zinc metalloproteinase STE24                            | Chen <i>Am J Med Genet A</i> 149A:1550, 2009 <sup>108</sup>                    | AR  | 606480           | 36                                       | 0                          | 36                            | 0                     |
| <b>ACTB</b>     | Actin beta                                              | Rivière <i>Nat Genet</i> 44:440, 2012 <sup>109</sup>                           | AD  | 102630           | 80                                       | 0                          | 80                            | 0                     |

| Gene                | Encoded protein                                       | Reference                                                                                                              | MOI | OMIM Gene number | Phenotypes reported in HGMD® a |                            |                               |                       |
|---------------------|-------------------------------------------------------|------------------------------------------------------------------------------------------------------------------------|-----|------------------|--------------------------------|----------------------------|-------------------------------|-----------------------|
|                     |                                                       |                                                                                                                        |     |                  | Total cases                    | CAKUT involvement reported | No CAKUT involvement reported | CAKUT involvement [%] |
| <b>ACTG1</b>        | Actin gamma 1                                         | Rivière <i>Nat Genet</i> 44:440, 2012 <sup>109</sup>                                                                   | AD  | 102560           | 64                             | 0                          | 64                            | 0                     |
| <b>ACTG2</b>        | Actin, gamma-2, smooth muscle, enteric                | Thorson <i>Hum Genet</i> 133:737, 2014 <sup>110</sup>                                                                  | AD  | 102545           | 28                             | 0                          | 28                            | 0                     |
| <b>ARID1B</b>       | AT-Rich interaction domain 1B                         | Levy <i>J Med Genet</i> 28, 1991 <sup>111</sup>                                                                        | AD  | 614556           | 332                            | 0                          | 332                           | 0                     |
| <b>BMP4</b>         | Bone morphogenic protein 4                            | Weber <i>J Am Soc Nephrol</i> 19:891, 2008 <sup>30</sup>                                                               | AD  | 112262           | 52                             | 8                          | 44                            | 15                    |
| <b>CD96</b>         | CD96 molecule                                         | Kaname <i>Am J Hum Genet</i> 81:835, 2007 <sup>112</sup>                                                               | AD  | 606037           | 5                              | 0                          | 5                             | 0                     |
| <b>CDKN1C</b>       | Cyclin dependent kinase inhibitor 1C                  | Mussa <i>Pediatr Nephrol</i> 27:397, 2012 <sup>113</sup>                                                               | AD  | 600856           | 87                             | 0                          | 87                            | 0                     |
| <b>CHD7</b>         | Chromodomain helicase DNA binding protein 7           | Janssen <i>Hum Mutat</i> 33:1149, 2012 <sup>114</sup>                                                                  | AD  | 608892           | 972                            | 1                          | 971                           | 0                     |
| <b>CREBBP</b>       | CREB binding protein                                  | Kanjilal <i>J Med Genet</i> 29:669, 1992 <sup>115</sup>                                                                | AD  | 600140           | 457                            | 0                          | 457                           | 0                     |
| <b>DACT1</b>        | Dishevelled binding antagonist of beta catenin 1      | Webb <i>Hum Mutat</i> 38:373, 2017 <sup>116</sup>                                                                      | AD  | 607861           | 10                             | 2                          | 8                             | 20                    |
| <b>EP300</b>        | E1A binding protein P300                              | Roelfsema <i>Am J Hum Genet</i> 76:572, 2005 <sup>117</sup>                                                            | AD  | 602700           | 133                            | 2                          | 131                           | 2                     |
| <b>FBN1</b>         | Fibrillin 1                                           | Tokhmafshan <i>Pediatr Nephrol</i> 32:565, 2017 <sup>118</sup>                                                         | AD  | 134797           | 3055                           | 0                          | 3055                          | 0                     |
| <b>FGF10</b>        | Fibroblast growth factor 10                           | Milunsky <i>Clin Genet</i> 69:349, 2006 <sup>119</sup> ,<br>Bamforth <i>Am J Med Genet</i> 43:932, 1992 <sup>120</sup> | AD  | 602115           | 19                             | 0                          | 19                            | 0                     |
| <b>FGF8</b>         | Fibroblast growth factor 8                            | Falardeau <i>J Clin Invest</i> 118:2822, 2008 <sup>121</sup>                                                           | AD  | 600483           | 47                             | 1                          | 46                            | 2                     |
| <b>FGFR1</b>        | Fibroblast growth factor receptor 1                   | Farrow <i>Am J Med Genet A</i> 140:537, 2006 <sup>122</sup>                                                            | AD  | 136350           | 301                            | 2                          | 299                           | 1                     |
| <b>FGFR2</b>        | Fibroblast growth factor receptor 2                   | LeHeup <i>Eur J Pediatr</i> 154:130, 1995 <sup>123</sup>                                                               | AD  | 176943           | 167                            | 1                          | 166                           | 1                     |
| <b>FGFR3</b>        | Fibroblast growth factor receptor 3                   | Rohmann <i>Nat Genet</i> 38:414, 2006 <sup>124</sup>                                                                   | AD  | 134934           | 85                             | 0                          | 85                            | 0                     |
| <b>FOXF1</b>        | Forkhead box F1                                       | Hilger <i>Hum Mutat</i> 36:1150, 2015 <sup>125</sup>                                                                   | AD  | 601089           | 149                            | 1                          | 148                           | 1                     |
| <b>FOXP1</b>        | Forkhead box P1                                       | Bekheirnia <i>Genet Med</i> 19:412, 2017 <sup>126</sup>                                                                | AD  | 605515           | 103                            | 2                          | 101                           | 2                     |
| <b>GDF6</b>         | Growth differentiation factor 6                       | Tassabehji <i>Hum Mutat</i> 29:1017, 2008 <sup>127</sup>                                                               | AD  | 601147           | 24                             | 0                          | 24                            | 0                     |
| <b>GFRA1</b>        | GDNF family receptor alpha 1                          | Chatterjee <i>Hum Genet</i> 131:1725, 2012 <sup>128</sup>                                                              | AD  | 601496           | 7                              | 1                          | 6                             | 14                    |
| <b>GLI2</b>         | GLI family zinc finger 2                              | Carmichael <i>J Urol</i> 190:1884, 2013 <sup>129</sup>                                                                 | AD  | 165230           | 105                            | 3                          | 102                           | 3                     |
| <b>GLI3</b>         | GLI family zinc finger 3                              | Cain <i>PLoS One</i> 4:e7313, 2009 <sup>130</sup>                                                                      | AD  | 165240           | 278                            | 9                          | 269                           | 3                     |
| <b>HOXA13</b>       | Homeobox A13                                          | Halal <i>Am J Med Genet</i> 30:793, 1998 <sup>131</sup>                                                                | AD  | 142959           | 31                             | 2                          | 29                            | 6                     |
| <b>JAG1</b>         | Jagged 1                                              | Kamath <i>Nat Rev Nephrol</i> 9:409, 2013 <sup>132</sup>                                                               | AD  | 601920           | 725                            | 3                          | 722                           | 0                     |
| <b>KAT6B</b>        | Lysine acetyltransferase 6B                           | Campeau <i>Am J Hum Genet</i> 90:282, 2012 <sup>133</sup>                                                              | AD  | 605880           | 117                            | 3                          | 114                           | 3                     |
| <b>KCNQ1OT1</b>     | KCNQ1 opposite strand/antisense transcript 1          | Chiesa <i>Hum Mol Genet</i> 21:10, 2012 <sup>134</sup>                                                                 | AD  | 604115           | 8                              | 0                          | 8                             | 0                     |
| <b>KCTD1</b>        | Potassium channel tetramerization domain containing 1 | Marneros <i>Am J Hum Genet</i> 92:621, 2013 <sup>135</sup>                                                             | AD  | 613420           | 11                             | 0                          | 11                            | 0                     |
| <b>KRAS</b>         | KRAS proto-oncogene, GTPase                           | Schubbert <i>Nat Genet</i> 38:331, 2006 <sup>136</sup>                                                                 | AD  | 190070           | 51                             | 0                          | 51                            | 0                     |
| <b>MLL2 / KMT2D</b> | Myeloid/lymphoid or mixed-lineage leukemia protein 2  | Banka <i>Eur J Hum Genet</i> 20:381, 2012 <sup>137</sup>                                                               | AD  | 602113           | 921                            | 7                          | 914                           | 1                     |
| <b>MNX1</b>         | Motor neuron and pancreas homeobox 1                  | Hagan <i>Am J Hum Genet</i> 66:1504, 2000 <sup>138</sup>                                                               | AD  | 142994           | 88                             | 1                          | 87                            | 1                     |
| <b>MTOR</b>         | Mechanistic target of rapamycin                       | Moosa <i>Am J Med Genet A</i> 173:264, 2017 <sup>139</sup>                                                             | AD  | 601231           | 43                             | 0                          | 43                            | 0                     |
| <b>MYCN</b>         | MYCN proto-oncogene                                   | Marcelis <i>Hum Mutat</i> 29:1125, 2008 <sup>140</sup>                                                                 | AD  | 164840           | 52                             | 1                          | 51                            | 2                     |



| Gene          | Encoded protein                                       | Reference                                                                                                    | MOI | OMIM Gene number | Phenotypes reported in HGMD <sup>a</sup> |                            |                               |                       |
|---------------|-------------------------------------------------------|--------------------------------------------------------------------------------------------------------------|-----|------------------|------------------------------------------|----------------------------|-------------------------------|-----------------------|
|               |                                                       |                                                                                                              |     |                  | Total cases                              | CAKUT involvement reported | No CAKUT involvement reported | CAKUT involvement [%] |
| <b>NFIX</b>   | Nuclear factor IX                                     | Malan <i>Am J Hum Genet</i> 87:189, 2010 <sup>141</sup>                                                      | AD  | 164005           | 120                                      | 0                          | 120                           | 0                     |
| <b>NIPBL</b>  | NIPBL, cohesin loading factor                         | Rohatgi <i>Am J Med Genet A</i> 152A:1641, 2010 <sup>142</sup>                                               | AD  | 608667           | 488                                      | 0                          | 488                           | 0                     |
| <b>NOTCH2</b> | Notch 2                                               | Kamath <i>Nat Rev Nephrol</i> 9:409, 2013 <sup>132</sup>                                                     | AD  | 600275           | 105                                      | 11                         | 94                            | 10                    |
| <b>PAX8</b>   | Paired box 8                                          | Meeus <i>J Clin Endocrinol Metab</i> 89:4285, 2004 <sup>143</sup>                                            | AD  | 167415           | 70                                       | 0                          | 70                            | 0                     |
| <b>PROK2</b>  | Prokineticin 2                                        | Madan <i>Mol Genet Metab Rep</i> 12:57, 2017 <sup>144</sup>                                                  | AD  | 607002           | 21                                       | 0                          | 21                            | 0                     |
| <b>PROKR2</b> | Prokineticin receptor 2                               | Sarfati <i>Front Horm Res</i> 39:121, 2010 <sup>145</sup>                                                    | AD  | 607123           | 86                                       | 0                          | 86                            | 0                     |
| <b>PTEN</b>   | Phosphatase and tensin homolog                        | Reardon <i>J Med Genet</i> 38:820, 2001 <sup>146</sup>                                                       | AD  | 601728           | 741                                      | 0                          | 741                           | 0                     |
| <b>PTPN11</b> | Protein tyrosine phosphatase, non-receptor type 11    | Bertola <i>Am J Med Genet A</i> 130A:378, 2004 <sup>69</sup>                                                 | AD  | 176876           | 167                                      | 0                          | 167                           | 0                     |
| <b>RAF1</b>   | Raf-1 proto-oncogene, serine/threonine kinase         | Razzaque <i>Nat Genet</i> 39:1013, 2007 <sup>147</sup>                                                       | AD  | 164760           | 76                                       | 0                          | 76                            | 0                     |
| <b>RAI1</b>   | Retinoic acid induced 1                               | Vilboux <i>PLoS One</i> 6:e22861, 2011 <sup>148</sup>                                                        | AD  | 607642           | 132                                      | 0                          | 132                           | 0                     |
| <b>SALL4</b>  | Spalt like transcription factor 4                     | Kohlhase <i>GeneReviews@Book Section</i> , 1993 <sup>149</sup>                                               | AD  | 607343           | 76                                       | 6                          | 70                            | 8                     |
| <b>SEMA3E</b> | Semaphorin 3E                                         | Lalani <i>J Med Genet</i> 41:e94, 2004 <sup>150</sup>                                                        | AD  | 608166           | 12                                       | 1                          | 11                            | 8                     |
| <b>SETBP1</b> | SET binding protein 1                                 | Schinzal <i>Am J Med Genet</i> 1:361, 1978 <sup>151</sup>                                                    | AD  | 611060           | 58                                       | 0                          | 58                            | 0                     |
| <b>SF3B4</b>  | Splicing factor 3b subunit 4                          | Bernier <i>Am J Hum Genet</i> 90:925, 2012 <sup>152</sup>                                                    | AD  | 605593           | 44                                       | 0                          | 44                            | 0                     |
| <b>SHH</b>    | Sonic hedgehog                                        | Lurie <i>Am J Med Genet</i> 35:286, 1990 <sup>153</sup>                                                      | AD  | 600725           | 240                                      | 1                          | 239                           | 0                     |
| <b>SNRNP</b>  | Small nuclear ribonucleoprotein polypeptides B and B1 | Tooley <i>Am J Med Genet A</i> 170A:1115, 2016 <sup>154</sup>                                                | AD  | 182282           | 7                                        | 0                          | 7                             | 0                     |
| <b>SOS1</b>   | SOS Ras/Rac guanine nucleotide exchange factor 1      | Ferrero <i>Eur J Med Genet</i> 51:566, 2008 <sup>155</sup>                                                   | AD  | 182530           | 115                                      | 0                          | 115                           | 0                     |
| <b>SOX9</b>   | SRY-box 9                                             | Airik <i>Hum Mol Genet</i> 19:4918, 2010 <sup>156</sup>                                                      | AD  | 608160           | 169                                      | 1                          | 168                           | 1                     |
| <b>SRCAP</b>  | Snf2 related CREBBP activator protein                 | Hood <i>Am J Hum Genet</i> 90:308, 2012 <sup>157</sup>                                                       | AD  | 611421           | 57                                       | 0                          | 57                            | 0                     |
| <b>TBX1</b>   | T-box 1                                               | Kujat <i>Am J Med Genet A</i> 140:1601, 2006 <sup>158</sup>                                                  | AD  | 602054           | 101                                      | 0                          | 101                           | 0                     |
| <b>TBX3</b>   | T-box 3                                               | Meneghini <i>Eur J Med Genet</i> 49:151, 2006 <sup>159</sup>                                                 | AD  | 601621           | 34                                       | 0                          | 34                            | 0                     |
| <b>TFAP2A</b> | Transcription factor AP-2 alpha                       | Milunsky <i>Am J Hum Genet</i> 82:1171, 2008 <sup>160</sup>                                                  | AD  | 107580           | 50                                       | 0                          | 50                            | 0                     |
| <b>TP63</b>   | Tumor protein P63                                     | Celli <i>Cell</i> 99:143, 1999 <sup>161</sup>                                                                | AD  | 603273           | 153                                      | 1                          | 152                           | 1                     |
| <b>TSC1</b>   | Tuberous sclerosis 1                                  | Curatolo <i>Lancet</i> 372:657, 2008 <sup>162</sup>                                                          | AD  | 605284           | 464                                      | 3                          | 461                           | 1                     |
| <b>TSC2</b>   | Tuberous sclerosis 2                                  | Kumar <i>Hum Mol Genet</i> 4:1471, 1995 <sup>163</sup>                                                       | AD  | 191092           | 1448                                     | 11                         | 1437                          | 1                     |
| <b>TWIST2</b> | Twist family BHLH transcription factor 2              | Stevens <i>Am J Med Genet</i> 107:30, 2002 <sup>164</sup>                                                    | AD  | 607556           | 9                                        | 0                          | 9                             | 0                     |
| <b>VANGL1</b> | VANGL planar cell polarity protein 1                  | Bartsch <i>Mol Syndromol</i> 3:76, 2012 <sup>165</sup>                                                       | AD  | 610132           | 25                                       | 1                          | 24                            | 4                     |
| <b>WNT5A</b>  | Wnt family member 5A                                  | Roifman <i>Clin Genet</i> 87:34, 2015 <sup>166</sup> ,<br>Person <i>Dev Dyn</i> 239:327, 2010 <sup>167</sup> | AD  | 164975           | 12                                       | 2                          | 10                            | 17                    |
| <b>AMER1</b>  | APC membrane recruitment protein 1                    | Pellegrino <i>Am J Med Genet</i> 70:159, 1997 <sup>168</sup>                                                 | XL  | 300647           | 44                                       | 1                          | 43                            | 2                     |
| <b>BCOR</b>   | BCL6 corepressor                                      | Ng <i>Nat Genet</i> 36:411, 2004 <sup>169</sup>                                                              | XL  | 300485           | 78                                       | 2                          | 76                            | 3                     |
| <b>FANCB</b>  | Fanconi anemia complementation group B                | McCauley <i>Am J Med Genet A</i> 155A:2370, 2011 <sup>170</sup>                                              | XL  | 300515           | 29                                       | 8                          | 21                            | 28                    |
| <b>FLNA</b>   | Filamin A                                             | Robertson <i>Am J Med Genet A</i> 140:1726, 2006 <sup>171</sup>                                              | XL  | 300017           | 323                                      | 3                          | 320                           | 1                     |

| Gene         | Encoded protein                                         | Reference                                                                    | MOI | OMIM Gene number | Phenotypes reported in HGMD <sup>a</sup> |                            |                               |                       |
|--------------|---------------------------------------------------------|------------------------------------------------------------------------------|-----|------------------|------------------------------------------|----------------------------|-------------------------------|-----------------------|
|              |                                                         |                                                                              |     |                  | Total cases                              | CAKUT involvement reported | No CAKUT involvement reported | CAKUT involvement [%] |
| <b>GPC3</b>  | Glypican 3                                              | Cottreau <i>Am J Med Genet C Semin Med Genet</i> 163:92, 2013 <sup>172</sup> | XL  | 300037           | 105                                      | 0                          | 105                           | 0                     |
| <b>KAL1</b>  | Anosmin 1                                               | Hardelin <i>Proc Natl Acad Sci U S A</i> 89:8190, 1992 <sup>173</sup>        | XL  | 300836           | 203                                      | 0                          | 203                           | 0                     |
| <b>KDM5C</b> | Lysine-specific demethylase 5C                          | Jensen <i>Am J Hum Genet</i> 76:227, 2005 <sup>174</sup>                     | XL  | 314690           | 72                                       | 0                          | 72                            | 0                     |
| <b>KDM6A</b> | Lysine-specific demethylase 6A                          | Rosenberg <i>Am J Med Genet</i> 182:85, 2020 <sup>175</sup>                  | XL  | 300128           | 94                                       | 0                          | 94                            | 0                     |
| <b>MID1</b>  | Midline 1                                               | Preiksaitiene <i>Clin Dysmorphol</i> 24:7, 2015 <sup>176</sup>               | XL  | 300552           | 105                                      | 0                          | 105                           | 0                     |
| <b>NSDHL</b> | NAD(P) dependent steroid dehydrogenase-like             | König <i>J Am Acad Dermatol</i> 46:594, 2002 <sup>177</sup>                  | XL  | 300275           | 33                                       | 1                          | 32                            | 3                     |
| <b>PIGA</b>  | Phosphatidylinositol glycan anchor biosynthesis class A | Johnston <i>Am J Hum Genet</i> 90:295, 2012 <sup>178</sup>                   | XL  | 311770           | 57                                       | 0                          | 57                            | 0                     |
| <b>PORCN</b> | Porcupine O-acyltransferase                             | Suskan <i>Pediatr Dermatol</i> 7:283, 1990 <sup>179</sup>                    | XL  | 300651           | 137                                      | 0                          | 137                           | 0                     |
| <b>SMC1A</b> | Structural maintenance of chromosomes 1A                | Deardorff <i>GeneReviews® Book Section Seattle(WA)</i> , 1993 <sup>180</sup> | XL  | 300040           | 115                                      | 0                          | 115                           | 0                     |
| <b>UPF3B</b> | UPF3B, regulator of nonsense mediated mRNA decay        | Lynch <i>Eur J Med Genet</i> 55:476, 2012 <sup>181</sup>                     | XL  | 300298           | 25                                       | 1                          | 24                            | 4                     |
| <b>ZIC3</b>  | Zic family member 3                                     | Chung <i>Am J Med Genet</i> 155:1123, 2011 <sup>182</sup>                    | XL  | 300265           | 45                                       | 0                          | 45                            | 0                     |

**AD**, autosomal dominant; **AR**, autosomal recessive; **MOI**, mode of inheritance; **OMIM**, Online Mendelian Inheritance in Men; **XL**, X-linked.

<sup>a</sup> The database HGMD<sup>®</sup> Professional 2020.3 was queried for the phenotypes reported for variants in the corresponding genes. Based on the available details, 'CAKUT involvement reported' was assumed when any CAKUT phenotype (see **Methods** for definitions) or renal involvement was specifically mentioned, and the percentage from total cases reported in this database was calculated. Last update from the database on February 25, 2021.

<sup>b</sup> The percentage of CAKUT involvement was equal to or greater than 50% but still listed here due to the very low number of total cases.

**Table S4. 46 renal cystic ciliopathy genes in which variants may cause phenocopies of CAKUT.**

Genes are listed by mode of inheritance and alphabetically by gene symbol.

| Gene                     | Disease                         | Reference                                                                                                                           | MOI | OMIM Gene number |
|--------------------------|---------------------------------|-------------------------------------------------------------------------------------------------------------------------------------|-----|------------------|
| <b>AHI1</b>              | Joubert Syndrome 3              | Parisi <i>J Med Gen</i> 43:334, 2005 <sup>183</sup>                                                                                 | AR  | 608894           |
| <b>ARL6</b>              | Bardet-Biedl Syndrome 3         | Pretorius <i>PLoS Genet</i> 6:e1000884, 2010 <sup>184</sup>                                                                         | AR  | 608845           |
| <b>BBS1</b>              | Bardet-Biedl Syndrome 1         | Tieder <i>Int J Pediatr Nephrol</i> 3:199, 1982 <sup>185</sup>                                                                      | AR  | 209901           |
| <b>BBS10</b>             | Bardet-Biedl Syndrome 10        | Tieder <i>Int J Pediatr Nephrol</i> 3:199, 1982 <sup>185</sup>                                                                      | AR  | 610148           |
| <b>BBS12</b>             | Bardet-Biedl Syndrome 12        | Tieder <i>Int J Pediatr Nephrol</i> 3:199, 1982 <sup>185</sup>                                                                      | AR  | 610683           |
| <b>BBS2</b>              | Bardet-Biedl Syndrome 2         | Tieder <i>Int J Pediatr Nephrol</i> 3:199, 1982 <sup>185</sup>                                                                      | AR  | 606151           |
| <b>BBS4</b>              | Bardet-Biedl Syndrome 4         | Tieder <i>Int J Pediatr Nephrol</i> 3:199, 1982 <sup>185</sup>                                                                      | AR  | 600374           |
| <b>BBS5</b>              | Bardet-Biedl Syndrome 5         | Tieder <i>Int J Pediatr Nephrol</i> 3:199, 1982 <sup>185</sup>                                                                      | AR  | 603650           |
| <b>BBS7</b>              | Bardet-Biedl Syndrome 7         | Tieder <i>Int J Pediatr Nephrol</i> 3:199, 1982 <sup>185</sup>                                                                      | AR  | 607590           |
| <b>CEP290</b>            | Joubert Syndrome 5              | Valente <i>Nat Genet</i> 68:623, 2006 <sup>186</sup>                                                                                | AR  | 610142           |
| <b>CPLANE1</b>           | Joubert Syndrome 17             | Cleper <i>Am J Med Genet</i> 47:451, 1993 <sup>187</sup>                                                                            | AR  | 614571           |
| <b>EVC</b>               | Ellis van Creveld Syndrome      | Moudgil <i>Pediatr Nephrol</i> 12:20, 1998 <sup>188</sup>                                                                           | AR  | 604831           |
| <b>EVC2</b>              | Ellis van Creveld Syndrome      | Kurian <i>Indian J Dent Res</i> 18:31, 2007 <sup>189</sup>                                                                          | AR  | 607261           |
| <b>GLIS2</b>             | Nephronophthisis 7              | Attanasio <i>Nat Genet</i> 39:1018, 2007 <sup>190</sup>                                                                             | AR  | 608539           |
| <b>IFT172</b>            | Jeune Syndrome                  | Friedland-Little <i>Hum Mol Genet</i> 20:3725, 2011 <sup>191</sup>                                                                  | AR  | 607386           |
| <b>IFT27</b>             | Bardet-Biedl Syndrome 19        | Schaefer <i>J Hum Genet</i> 61:447, 2016 <sup>192</sup>                                                                             | AR  | 615870           |
| <b>IFT52</b>             | Short-rib thoracic dysplasia 16 | Walczak-Sztulpa <i>Am J Med Genet A</i> 173:1364, 2017 <sup>193</sup> ,<br>Dupont <i>Hum Mol Genet</i> 28:2720, 2019 <sup>194</sup> | AR  | 617094           |
| <b>IFT57</b>             | Orofaciodigital Syndrome XVIII  | Bruel <i>J Med Genet</i> 54:371, 2017 <sup>195</sup>                                                                                | AR  | 606621           |
| <b>IFT74</b>             | Bardet-Biedl Syndrome 20        | Cevik <i>PLoS Genet</i> 9:e1003977, 2013 <sup>196</sup>                                                                             | AR  | 608040           |
| <b>IFT80</b>             | Short-rib thoracic dysplasia 2  | Beales <i>Nat Genet</i> 39:727, 2007 <sup>197</sup>                                                                                 | AR  | 611177           |
| <b>IFT81</b>             | Short-rib thoracic dysplasia 19 | Perrault <i>J Med Genet</i> 52:657, 2015 <sup>198</sup>                                                                             | AR  | 605489           |
| <b>INPP5E</b>            | Joubert Syndrome 1              | Travaglini <i>Eur J Hum Genet</i> 21:1074, 2013 <sup>199</sup>                                                                      | AR  | 613037           |
| <b>INVS</b>              | Nephronophthisis 2              | Otto <i>Nat Genet</i> 34:413, 2003 <sup>200</sup>                                                                                   | AR  | 243305           |
| <b>KIF14</b>             | Meckel Syndrome 12              | Filges <i>Clin Genet</i> 86:220, 2013 <sup>201</sup>                                                                                | AR  | 611279           |
| <b>MKKS</b>              | Bardet-Biedl Syndrome 6         | Tieder <i>Int J Pediatr Nephrol</i> 3:199, 1982 <sup>185</sup> ;<br>Yamamura <i>Clin Exp Nephrol</i> 21:136, 2017 <sup>202</sup>    | AR  | 604896           |
| <b>MKS1</b>              | Meckel Syndrome, type 1         | Kyttälä <i>Nat Genet</i> 38:155, 2006 <sup>203</sup>                                                                                | AR  | 609883           |
| <b>MKS3 /<br/>TMEM67</b> | Nephronophthisis 11             | Baala <i>Am J Hum Genet</i> 80:186, 2007 <sup>204</sup> ,<br>Kumar <i>Am J Med Genet</i> 61:122, 1996 <sup>205</sup>                | AR  | 609884           |
| <b>NEK1</b>              | Short-rib thoracic dysplasia 6  | Thiel <i>Am J Hum Genet</i> 88:106, 2011 <sup>206</sup>                                                                             | AR  | 604588           |
| <b>NPHP1</b>             | Nephronophthisis 1              | Hildebrandt <i>Nat Genet</i> 17:149, 1997 <sup>207</sup>                                                                            | AR  | 607100           |
| <b>NPHP3</b>             | Nephronophthisis 3              | Olbrich <i>Nat Genet</i> 34:455, 2003 <sup>208</sup>                                                                                | AR  | 608002           |
| <b>NPHP4</b>             | Nephronophthisis 4              | Otto <i>Am J Hum Genet</i> 71:1161, 2002 <sup>209</sup>                                                                             | AR  | 607215           |
| <b>PKHD1</b>             | Polycystic kidney disease 4     | Bergmann <i>Kidney Int</i> 67:829, 2005 <sup>210</sup>                                                                              | AR  | 606702           |
| <b>PTHB1</b>             | Bardet-Biedl Syndrome 9         | Tieder <i>Int J Pediatr Nephrol</i> 3:199, 1982 <sup>185</sup>                                                                      | AR  | 607968           |
| <b>RPGRIP1L</b>          | Joubert Syndrome 7              | Suzuki <i>Clin Genet</i> 90:526, 2016 <sup>211</sup>                                                                                | AR  | 610937           |
| <b>SDCCAG8</b>           | Bardet-Biedl Syndrome 16        | Airik <i>J Am Soc Nephrol</i> 25:2573, 2014 <sup>212</sup>                                                                          | AR  | 613524           |
| <b>TMEM216</b>           | Joubert Syndrome 2              | Edvardson <i>Am J Hum Genet</i> 86:93, 2010 <sup>213</sup>                                                                          | AR  | 613277           |
| <b>TMEM231</b>           | Joubert Syndrome 20             | Shaheen <i>J Med Genetics</i> 50:160, 2013 <sup>214</sup>                                                                           | AR  | 614949           |
| <b>TMEM237</b>           | Joubert Syndrome 14             | Huang <i>Am J Hum Genet</i> 89:713, 2011 <sup>215</sup>                                                                             | AR  | 614423           |

| Gene          | Disease                           | Reference                                                            | MOI | OMIM Gene number |
|---------------|-----------------------------------|----------------------------------------------------------------------|-----|------------------|
| <b>TRIM32</b> | Bardet-Biedl Syndrome 11          | Chiang <i>Proc Natl Acad Sci U S A</i> 103:6287, 2006 <sup>216</sup> | AR  | 602290           |
| <b>TTC21B</b> | Nephronophthisis 12               | Davis <i>Nat Genet</i> 43:189, 2011 <sup>217</sup>                   | AR  | 612014           |
| <b>TTC8</b>   | Bardet-Biedl Syndrome 8           | Tieder <i>Int J Pediatr Nephrol</i> 3:199, 1982 <sup>185</sup>       | AR  | 608132           |
| <b>BICC1</b>  | Renal cystic dysplasia            | Kraus <i>Hum Mutat</i> 33:86, 2012 <sup>218</sup>                    | AD  | 614295           |
| <b>PKD1</b>   | Polycystic kidney disease 1       | Rossetti <i>J Am Soc Nephrol</i> 18:2143, 2007 <sup>219</sup>        | AD  | 601313           |
| <b>PKD2</b>   | Polycystic kidney disease 2       | Rossetti <i>J Am Soc Nephrol</i> 18:2143, 2007 <sup>219</sup>        | AD  | 173910           |
| <b>UMOD</b>   | Medullary cystic kidney disease 2 | Hart <i>J Med Genet</i> 39:882, 2002 <sup>220</sup>                  | AD  | 191845           |
| <b>OFD1</b>   | Joubert Syndrome 10               | Bisschoff <i>Hum Mutat</i> 34:237, 2013 <sup>221</sup>               | XL  | 300170           |

**AD**, autosomal dominant; **AR**, autosomal recessive; **MOI**, mode of inheritance; **OMIM**, Online Mendelian Inheritance in Men; **XL**, X-linked.

**Table S5. Phenotypic details for 24 families in whom reverse phenotyping confirmed a likely deleterious variant as causative.**  
Families are listed in alphabetical order by gene symbol. Underlined text indicated signs/symptoms that yielded from reverse phenotyping.

| Family | Gene         | Pedigree relation Sex | <i>A priori</i> Renal phenotype                    | <i>A priori</i> Extrarenal phenotype                                                                                                                                            | <i>Post ES</i> Renal phenotype                     | <i>Post ES</i> Extrarenal phenotype                                                                                                                                                                             | Conclusion/remarks                                                                                                  |
|--------|--------------|-----------------------|----------------------------------------------------|---------------------------------------------------------------------------------------------------------------------------------------------------------------------------------|----------------------------------------------------|-----------------------------------------------------------------------------------------------------------------------------------------------------------------------------------------------------------------|---------------------------------------------------------------------------------------------------------------------|
| B982   | <b>ACTG1</b> | Index ind. M          | BL hydronephrosis and VUR grade 1, renal dysplasia | BL optic nerve atrophy, developmental delay, abnormal brain development, dilated aortic root, bicuspid aortic valve, chronic lung disease, tracheobronchomalacy, kyphoscoliosis | BL hydronephrosis and VUR grade 1, renal dysplasia | <u>Microcephaly, deafness</u> , BL optic nerve atrophy, developmental delay, abnormal brain development, dilated aortic root, bicuspid aortic valve, chronic lung disease, tracheobronchomalacy, kyphoscoliosis | Additional extrarenal features consistent with syndrome caused by variants in <i>ACTG1</i> (OMIM: 102560)           |
| B1587  | <b>BMP4</b>  | Index ind. M          | PUV                                                | Intellectual disability, polydactyly/syndactyly                                                                                                                                 | PUV, <u>R VUR and hydronephrosis, micropenis</u>   | <u>Large ears</u> , intellectual disability, <u>psychomotor delay</u> , polydactyly/syndactyly                                                                                                                  | Additional CAKUT and extrarenal features consistent with syndrome caused by variants in <i>BMP4</i> (OMIM: 112262)  |
| B3542  | <b>EYA1</b>  | Index ind. M          | BL renal hypodysplasia                             | -                                                                                                                                                                               | BL renal hypodysplasia                             | <u>R branchial cleft cyst</u>                                                                                                                                                                                   | Clinical diagnosis of branchio-oto-renal syndrome (OMIM: 113650)                                                    |
|        |              | Twin of index ind. M  | BL renal hypodysplasia                             | -                                                                                                                                                                               | BL renal hypodysplasia                             | <u>R branchial cleft cyst</u>                                                                                                                                                                                   |                                                                                                                     |
| B1171  | <b>EYA1</b>  | Index ind. M          | Solitary pelvic kidney                             | -                                                                                                                                                                               | Solitary pelvic kidney                             | <u>R lower neck mass</u> (consistent with branchial cleft anomaly)                                                                                                                                              | Clinical diagnosis of branchio-oto-renal syndrome (OMIM: 113650)                                                    |
| A872   | <b>FGFR2</b> | Index ind. M          | L dysplastic kidney and VUR grade 1                | Clubfeet                                                                                                                                                                        | L dysplastic kidney and VUR grade 1                | <u>Unusual acne vulgaris, nasal polyposis and sinusitis, systolic murmur</u> , L pes equinovarus, <u>R syndactyly of toes 2/3</u>                                                                               | Additional and specific (syndactyly) extrarenal features consistent with Apert syndrome (OMIM: 101200) <sup>a</sup> |
| B3543  | <b>GLI3</b>  | Index ind. F          | R VUR grade 5                                      | Tracheoesophageal fistula, imperforate anus                                                                                                                                     | R VUR grade 5                                      | Tracheoesophageal fistula, <u>esophageal atresia, atrial septal defect, patent ductus arteriosus</u> , imperforate anus, <u>failure to thrive</u>                                                               | Additional extrarenal features consistent with syndrome caused by variants in <i>GLI3</i> (OMIM: 165240)            |
| B3348  | <b>HNF1B</b> | Index ind. F          | BL renal hypodysplasia                             | -                                                                                                                                                                               | BL renal hypodysplasia, <u>hyperuricemia</u>       | -                                                                                                                                                                                                               | Additional hyperuricemia which can be accounted to the variant detected in <i>HNF1B</i> (OMIM: 189907)              |

| Family | Gene          | Pedigree relation Sex | <i>A priori</i> Renal phenotype                                                      | <i>A priori</i> Extrarenal phenotype                                               | <i>Post ES</i> Renal phenotype                                                              | <i>Post ES</i> Extrarenal phenotype                                                                                                     | Conclusion/remarks                                                                                                             |
|--------|---------------|-----------------------|--------------------------------------------------------------------------------------|------------------------------------------------------------------------------------|---------------------------------------------------------------------------------------------|-----------------------------------------------------------------------------------------------------------------------------------------|--------------------------------------------------------------------------------------------------------------------------------|
| A1315  | <b>HNF1B</b>  | Index ind. M          | L UPJO                                                                               | -                                                                                  | L UPJO                                                                                      | -                                                                                                                                       | Variant segregates with affected father and brother (see Table S6 for details), which was not previously known                 |
| B717   | <b>JAG1</b>   | Index ind. M          | Renal dysplasia, echogenic kidney                                                    | Coarctation of the aorta, ventricular septal defect, peripheral pulmonary stenosis | Renal dysplasia, echogenic kidney                                                           | <u>Developmental delay, intellectual disability, coarctation of the aorta, ventricular septal defect, peripheral pulmonary stenosis</u> | Additional neurological features detected                                                                                      |
| B345   | <b>KAT6B</b>  | Index ind. F          | R hypoplastic kidney with VUR                                                        | Intellectual disability, growth retardation, polydactyly/syndactyly                | R hypoplastic kidney with VUR                                                               | Intellectual disability, growth retardation, <u>hearing loss, polydactyly/syndactyly</u>                                                | Extrarenal features consistent with syndrome caused by variants in <b>KAT6B</b> (OMIM: 605880)                                 |
| B2758  | <b>KDM5C</b>  | Index ind. M          | Epispadias, cryptorchidism                                                           | Microcephaly, facial dysmorphism, skeletal deformity, growth retardation           | Epispadias, cryptorchidism, <u>micropenis</u>                                               | Microcephaly, facial dysmorphism, <u>strabismus, skeletal deformity, growth retardation, developmental delay, clubfoot</u>              | Additional CAKUT and extrarenal features consistent with syndrome caused by variants in <b>KDM5C</b> (OMIM: 300534)            |
| B1099  | <b>NOTCH2</b> | Index ind. F          | L renal agenesis, R cystic kidney, neurogenic bladder, duplicated internal genitalia | Tetralogy of Fallot, sacral agenesis, imperforate anus, hirsutism                  | L renal agenesis, <u>R cystic kidney, neurogenic bladder, duplicated internal genitalia</u> | <u>Esophageal strictures, tetralogy of Fallot, kyphoscoliosis, sacral agenesis, imperforate anus, hirsutism</u>                         | Additional CAKUT and extrarenal features detected, consistent with syndrome caused by variants in <b>NOTCH2</b> (OMIM: 600275) |
| B4111  | <b>PAX2</b>   | Index ind. M          | PUV                                                                                  | -                                                                                  | PUV                                                                                         | <u>Strabismus, suspected optic disc atrophy</u>                                                                                         | Clinical diagnosis of papillorenal syndrome (OMIM: 120330)                                                                     |
| B1680  | <b>PBX1</b>   | Index ind. F          | L UVJO                                                                               | -                                                                                  | L UVJO                                                                                      | <u>Abnormally shaped ears</u>                                                                                                           | Additional facial features consistent with phenotype known to be caused by variants in <b>PBX1</b> (OMIM: 617641)              |
| B3947  | <b>PTPN11</b> | Index ind. F          | BL hydronephrosis, L VUR grade 5, L hydroureter                                      | -                                                                                  | BL hydronephrosis, L VUR grade 5, L hydroureter                                             | <u>Microcephaly, ptosis, myopia, widely spaced teeth, pectus carinatum</u>                                                              | Additional extrarenal features consistent with Noonan syndrome (OMIM: 163950)                                                  |
| B3862  | <b>SALL4</b>  | Index ind. F          | BL VUR                                                                               | -                                                                                  | BL VUR                                                                                      | <u>Scoliosis</u>                                                                                                                        | Additional scoliosis detected (OMIM: 607343)                                                                                   |
| B595   | <b>SF3B4</b>  | Index ind. F          | BL hydronephrosis, bladder exstrophy                                                 | Cloacal malformation                                                               | BL hydronephrosis, bladder exstrophy                                                        | <u>Butterfly vertebral anomaly, short gut syndrome, omphalocele, doubling of uterus, cloacal malformation</u>                           | Additional features consistent with syndrome caused by variants in <b>SF3B4</b> (OMIM: 154400)                                 |
| B3182  | <b>SRCAP</b>  | Index ind. M          | L UVJO                                                                               | -                                                                                  | L UVJO                                                                                      | <u>Low posterior hairline, triangular face, long eyelashes, prominent nose, thin lips</u>                                               | Additional features consistent with Floating-Harbor syndrome (OMIM: 136140)                                                    |

| Family | Gene        | Pedigree relation Sex  | <i>A priori</i> Renal phenotype                               | <i>A priori</i> Extrarenal phenotype        | <i>Post ES</i> Renal phenotype                                               | <i>Post ES</i> Extrarenal phenotype                                                                                    | Conclusion/remarks                                                                                                                                                |
|--------|-------------|------------------------|---------------------------------------------------------------|---------------------------------------------|------------------------------------------------------------------------------|------------------------------------------------------------------------------------------------------------------------|-------------------------------------------------------------------------------------------------------------------------------------------------------------------|
| B4148  | <b>TP63</b> | Index ind. M           | L renal agenesis, R VUR grade 4-5 and hydronephrosis          | Low set ear, short neck, growth retardation | L renal agenesis, R VUR grade 4-5 and hydronephrosis                         | <u>Photophobia, blepharitis, strabismus</u> , low set ears, short neck, <u>malformed auricles</u> , growth retardation | Additional facial features consistent with syndrome caused by variants in <i>TP63</i> (OMIM: 603273)                                                              |
| B3618  | <b>BBS4</b> | Index ind. M           | L renal agenesis, R hydronephrosis                            | Polydactyly                                 | L renal agenesis, R hydronephrosis, <u>cryptorchidism</u>                    | <u>Night blindness, intellectual disability, postaxial polydactyly of foot, obesity, hypogonadism</u>                  | Clinical diagnosis of Bardet-Biedl syndrome (OMIM: 615982)                                                                                                        |
| B907   | <b>PKD1</b> | Index ind. M           | BL cystic kidneys and VUR grade 5, R duplex collecting system | -                                           | BL cystic kidneys and VUR grade 5, R duplex collecting system                | -                                                                                                                      | Variant segregates with affected father (see Table S8 for details), which was not previously known                                                                |
| B587   | <b>PKD1</b> | Index ind. M           | L MCDK                                                        | -                                           | L MCDK, <u>R cystic kidney with loss of corticomedullary differentiation</u> | -                                                                                                                      | <i>Post ES</i> phenotype consistent with ADPKD (OMIM: 173900); variant segregates with affected father (see Table S8 for details), which was not previously known |
| A4479  | <b>PKD2</b> | Index ind. F           | L MCDK, BL duplex collecting system                           | -                                           | L MCDK, BL duplex collecting system                                          | -                                                                                                                      | Variant segregates with affected father (see Table S8 for details), which was not previously known                                                                |
|        |             | Father of index ind. M | BL polycystic kidneys                                         | -                                           | BL polycystic kidneys                                                        | -                                                                                                                      |                                                                                                                                                                   |
| B4070  | <b>UMOD</b> | Index ind. M           | PUV, BL hydronephrosis and multicystic kidneys                | -                                           | PUV, BL hydronephrosis and <u>echogenic</u> , multicystic kidneys            | <u>Pulmonary hypoplasia, ascites</u>                                                                                   | <i>Post ES</i> confirmation of echogenic kidneys compatible with variant detected in <i>UMOD</i> (OMIM: 162000) <sup>b</sup>                                      |

-, not reported; **ADPKD**, autosomal dominant polycystic kidney disease; **BL**, bilateral; **ES**, exome sequencing; **F**, female; **ind**, individual; **L**, left; **M**, male; **MCDK**, multicystic dysplastic kidney; **PUV**, posterior urethral valve; **R**, right; **UPJO**, uretero-pelvic junction obstruction; **UVJO**, uretero-vesical junction obstruction; **VUR**, vesicoureteral reflux

<sup>a</sup> Slaney *Am J Hum Genet* 58:923, 1996<sup>222</sup>.

<sup>b</sup> Increased echogenicity is a diagnostic feature of autosomal dominant tubulointerstitial kidney disease (ADTKD); Devuyst *Nat Rev Dis Primers* 5:60, 2019<sup>223</sup>.

**Table S6. Detailed information on phenotype and genotype for 83 families with likely causative variants in genes known to cause isolated or syndromic CAKUT.**

Families are listed in alphabetical order by gene symbol.

| Family             | Gene         | Zygo-<br>sity             | Nucleotide<br>change<br>Protein change<br>dbSNP | Amino<br>acid<br>con-<br>serva-<br>tion <sup>a</sup> | PP2<br>SIFT<br>MT | gnomAD <sup>b</sup><br>EVS | HGMD <sup>c</sup><br>ClinVar <sup>d</sup><br>ACMG/<br>AMP <sup>e</sup> | Pedigree<br>relation<br>Sex | Homo-<br>zygo-<br>sity<br>[Mb] | Segregation<br>maternal;<br>paternal;<br>(other) | Renal phenotype                                             | Extrarenal<br>phenotype                                                                                                                                                                                                                    | Reference<br>[PMID] <sup>f</sup> |
|--------------------|--------------|---------------------------|-------------------------------------------------|------------------------------------------------------|-------------------|----------------------------|------------------------------------------------------------------------|-----------------------------|--------------------------------|--------------------------------------------------|-------------------------------------------------------------|--------------------------------------------------------------------------------------------------------------------------------------------------------------------------------------------------------------------------------------------|----------------------------------|
| B982               | <b>ACTG1</b> | <i>De<br/>novo</i><br>HET | c.812C>T<br>p.Ser271Phe<br>-                    | X. t.                                                | 0.722<br>D<br>DC  | -<br>-                     | G<br>-<br>VUS                                                          | Index ind.<br>M             | 7                              | WT; WT                                           | BL<br>hydronephrosis<br>and VUR grade 1,<br>renal dysplasia | Microcephaly,<br>deafness, BL optic<br>nerve atrophy,<br>developmental<br>delay, abnormal<br>brain development,<br>dilated aortic root,<br>bicuspid aortic valve,<br>chronic lung<br>disease,<br>tracheobronchoma-<br>lacy, kyphoscoliosis | <i>Novel</i>                     |
| B1587 <sup>9</sup> | <b>BMP4</b>  | HET                       | c.1214G>A<br>p.Cys405Tyr<br>-                   | D. r.                                                | 0.999<br>D<br>-   | -<br>-                     | G<br>-<br>VUS                                                          | Index ind.<br>M             | 4                              | N/A; N/A                                         | PUV, R VUR and<br>hydronephrosis,<br>micropenis             | Large ears,<br>intellectual disability,<br>psychomotor delay,<br>polydactyly/<br>syndactyly                                                                                                                                                | <i>Novel</i>                     |
| B2575 <sup>9</sup> | <b>BNC2</b>  | HET                       | c.1296G>T<br>p.Met432Ile<br>rs368914032         | C. i.                                                | 0.191<br>T<br>DC  | 0/5/250630<br>0/1/6502     | G<br>-<br>LB                                                           | Index ind.<br>M             | 3                              | N/A; WT                                          | PUV                                                         | -                                                                                                                                                                                                                                          | <i>Novel</i>                     |
| B3372 <sup>9</sup> | <b>BNC2</b>  | HET                       | c.2372A>G<br>p.Tyr791Cys<br>rs889762379         | D. r.                                                | 0.990<br>T<br>DC  | -<br>-                     | G<br>-<br>VUS                                                          | Index ind.<br>M             | 166                            | WT; HET                                          | PUV,<br>hypospadias, BL<br>VUR and<br>hydronephrosis        | -                                                                                                                                                                                                                                          | <i>Novel</i>                     |
| B3149 <sup>9</sup> | <b>BNC2</b>  | HET                       | c.2221G>A<br>p.Asp741Asn<br>rs554243088         | D. r.                                                | 0.117<br>D<br>DC  | 0/13/251098<br>-           | G<br>-<br>LB                                                           | Index ind.<br>M             | 6                              | N/A; N/A                                         | L renal agenesis,<br>R VUR grade 3                          | -                                                                                                                                                                                                                                          | <i>Novel</i>                     |
| B3224 <sup>9</sup> | <b>DSTYK</b> | HET                       | c.454C>T<br>p.Arg152Cys<br>rs202242580          | D. r. <sup>h</sup>                                   | 0.719<br>D<br>DC  | 0/3/282342<br>-            | G<br>-<br>VUS                                                          | Index ind.<br>M             | 26                             | WT; HET                                          | BL UVJO and<br>hydronephrosis                               | Facial dysmorphism                                                                                                                                                                                                                         | <i>Novel</i>                     |
| B3542              | <b>EYA1</b>  | HET                       | c.1081C>T<br>p.Arg361*<br>rs121909202           | -                                                    | -                 | -                          | DM<br>PATH<br>P                                                        | Index ind.<br>M             | 19                             | N/A; N/A;<br>affected twin<br>brother: HET       | BL renal<br>hypodysplasia                                   | R branchial cleft cyst                                                                                                                                                                                                                     | 16691597<br><sup>224</sup>       |
|                    |              |                           |                                                 |                                                      |                   |                            |                                                                        | Twin of<br>index ind.<br>M  | 7                              | N/A; N/A;<br>affected twin<br>brother: HET       | BL renal<br>hypodysplasia                                   | R branchial cleft cyst                                                                                                                                                                                                                     |                                  |
| B1481              | <b>EYA1</b>  | HET                       | c.1081C>T<br>p.Arg361*<br>rs121909202           | -                                                    | -                 | -                          | DM<br>PATH<br>P                                                        | Index ind.<br>F             | 6                              | WT; HET <sup>i</sup>                             | L renal agenesis,<br>BL VUR                                 | Deafness, neck<br>fistula                                                                                                                                                                                                                  | 16691597<br><sup>224</sup>       |



| Family             | Gene         | Zygo-<br>sity | Nucleotide<br>change<br>Protein change<br>dbSNP | Amino<br>acid<br>con-<br>serva-<br>tion <sup>a</sup> | PP2<br>SIFT<br>MT | gnomAD <sup>b</sup><br>EVS | HGMD <sup>c</sup><br>ClinVar <sup>d</sup><br>ACMG/<br>AMP <sup>e</sup> | Pedigree<br>relation<br>Sex | Homo-<br>zygo-<br>sity<br>[Mb] | Segregation<br>maternal;<br>paternal;<br>(other) | Renal phenotype                                                                                     | Extrarenal<br>phenotype                                                                                                                 | Reference<br>[PMID] <sup>f</sup> |
|--------------------|--------------|---------------|-------------------------------------------------|------------------------------------------------------|-------------------|----------------------------|------------------------------------------------------------------------|-----------------------------|--------------------------------|--------------------------------------------------|-----------------------------------------------------------------------------------------------------|-----------------------------------------------------------------------------------------------------------------------------------------|----------------------------------|
| B3257 <sup>9</sup> | <b>EYA1</b>  | HET           | c.679G>A<br>p.Ala227Thr<br>rs202168841          | D. m.                                                | 1.000<br>D<br>DC  | 0/14/282842<br>-           | G<br>-<br>LB                                                           | Index ind.<br>F             | 88                             | N/A; N/A                                         | L renal agenesis<br>(suspected<br>aplasia or<br>involution due to<br>MCDK), R<br>hypoplastic kidney | -                                                                                                                                       | <i>Novel</i>                     |
| B3256 <sup>9</sup> | <b>EYA1</b>  | HET           | c.689A>G<br>p.Tyr230Cys<br>rs1213738374         | D. m.                                                | 0.998<br>D<br>DC  | -<br>-                     | G<br>-<br>VUS                                                          | Index ind.<br>F             | 62                             | WT; HET                                          | R UPJO and<br>hydronephrosis                                                                        | -                                                                                                                                       | <i>Novel</i>                     |
| B1024 <sup>9</sup> | <b>EYA1</b>  | HET           | c.83C>G<br>p.Ser28Cys<br>rs558089479            | D. r.                                                | 0.998<br>D<br>DC  | 0/1/251488<br>-            | G<br>-<br>VUS                                                          | Index ind.<br>M             | 16                             | N/A; N/A                                         | L MCDK                                                                                              | -                                                                                                                                       | <i>Novel</i>                     |
| B1171 <sup>9</sup> | <b>EYA1</b>  | HET           | c.809T>C<br>p.Val270Ala<br>rs1342127067         | X. t.                                                | 0.008<br>T<br>DC  | 0/1/251464<br>-            | G<br>-<br>VUS                                                          | Index ind.<br>M             | 1                              | N/A; N/A                                         | Solitary pelvic<br>kidney                                                                           | R lower neck mass<br>(consistent with<br>branchial cleft<br>anomaly)                                                                    | <i>Novel</i>                     |
| B3817 <sup>9</sup> | <b>EYA1</b>  | HET           | c.700C>A<br>p.Pro234Thr<br>-                    | D. r.                                                | 0.997<br>T<br>DC  | -<br>-                     | G<br>-<br>VUS                                                          | Index ind.<br>F             | 15                             | WT; N/A                                          | BL VUR grade 2                                                                                      | -                                                                                                                                       | <i>Novel</i>                     |
| A3342 <sup>9</sup> | <b>FGFR1</b> | HET           | c.2152C>T<br>p.Arg718Cys<br>-                   | D. m.                                                | 1.000<br>D<br>DC  | -<br>-                     | R<br>-<br>LP                                                           | Index ind.<br>M             | 26                             | N/A; N/A                                         | R renal agenesis                                                                                    | Otapostasis,<br>malformed auricles,<br>intergluteal cleft,<br>hydrocele,<br>intrauterine growth<br>retardation                          | <i>Novel</i>                     |
| A872 <sup>9</sup>  | <b>FGFR2</b> | HET           | c.1608G>A<br>p.Met536Ile<br>rs1057519800        | D. r.                                                | 0.991<br>D<br>DC  | -<br>-                     | G<br>LP<br>P                                                           | Index ind.<br>M             | 8                              | N/A; N/A                                         | L dysplastic<br>kidney and VUR<br>grade 1                                                           | Unusual acne<br>vulgaris, nasal<br>polyposis and<br>sinusitis, systolic<br>murmur, L pes<br>equinovarus, R<br>syndactyly of toes<br>2/3 | <i>Novel</i>                     |
| B2675              | <b>FRAS1</b> | HET           | c.4579C>T<br>p.Arg1527Trp<br>rs1872267          | D. r. <sup>j</sup>                                   | 0.724<br>D<br>DC  | 2/759/280412<br>0/24/6196  | DM<br>US<br>VUS                                                        | Index ind.<br>M             | 3                              | N/A; N/A                                         | PUV, secondary<br>neurogenic<br>bladder                                                             | -                                                                                                                                       | 24700879<br><sup>35</sup>        |
|                    | <b>FRAS1</b> | HET           | c.9364C>T<br>p.Arg3122Trp<br>rs200346497        | D. r.                                                | 1.000<br>D<br>DC  | 0/84/278976<br>-           | DM<br>US/LB<br>VUS                                                     |                             |                                | N/A; N/A                                         |                                                                                                     |                                                                                                                                         | 24700879<br><sup>35</sup>        |
| B3860              | <b>FRAS1</b> | HET           | c.9521A>C<br>p.Asp3174Ala<br>-                  | G. g.                                                | 1.000<br>D<br>DC  | -<br>-                     | R<br>-<br>VUS                                                          | Index ind.<br>M             | 2                              | WT; HET                                          | BL enlarged<br>echogenic<br>kidneys,<br>oligohydramnios                                             | -                                                                                                                                       | <i>Novel</i>                     |
|                    | <b>FRAS1</b> | HET           | c.4028G>C<br>p.Gly1343Ala<br>rs182375530        | C. i.                                                | 1.000<br>D<br>DC  | 1/5/248208<br>-            | G<br>-<br>VUS                                                          |                             |                                | HET; WT                                          |                                                                                                     |                                                                                                                                         | <i>Novel</i>                     |

| Family             | Gene          | Zygo-<br>sity    | Nucleotide<br>change<br>Protein change<br>dbSNP | Amino<br>acid<br>con-<br>serva-<br>tion <sup>a</sup> | PP2<br>SIFT<br>MT | gnomAD <sup>b</sup><br>EVS | HGMD <sup>c</sup><br>ClinVar <sup>d</sup><br>ACMG/<br>AMP <sup>e</sup> | Pedigree<br>relation<br>Sex | Homo-<br>zygo-<br>sity<br>[Mb] | Segregation<br>maternal;<br>paternal;<br>(other) | Renal phenotype                                | Extrarenal<br>phenotype                                                                                                                              | Reference<br>[PMID] <sup>f</sup> |
|--------------------|---------------|------------------|-------------------------------------------------|------------------------------------------------------|-------------------|----------------------------|------------------------------------------------------------------------|-----------------------------|--------------------------------|--------------------------------------------------|------------------------------------------------|------------------------------------------------------------------------------------------------------------------------------------------------------|----------------------------------|
| B2418              | <b>FRAS1</b>  | HOM              | c.8486C>A<br>p.Ser2829Tyr<br>rs376788346        | D. r.                                                | 0.965<br>D<br>DC  | 4/147/248942<br>0/2/6052   | G<br>U<br>S<br>B                                                       | Index ind.<br>M             | 122                            | HET; HET;<br>unaffected<br>sister: WT            | R renal agenesis                               | -                                                                                                                                                    | <i>Novel</i>                     |
| B3519              | <b>FREM2</b>  | HET              | c.4030C>A<br>p.Arg1344Ser<br>rs114409305        | D. r.                                                | 0.587<br>D<br>-   | 0/18/251384<br>-           | R<br>-<br>VUS                                                          | Index ind.<br>F             | 15                             | WT; HET                                          | BL VUR grade 2                                 | -                                                                                                                                                    | <i>Novel</i>                     |
|                    | <b>FREM2</b>  | HET              | c.4512G>A<br>p.Met1504Ile<br>-                  | D. r.                                                | 0.022<br>D<br>-   | -<br>-                     | G<br>-<br>LB                                                           |                             |                                | HET; WT                                          |                                                |                                                                                                                                                      | <i>Novel</i>                     |
| B1784 <sup>g</sup> | <b>GLI2</b>   | HET              | c.1418G>A<br>p.Arg473His<br>rs150170739         | D. m. <sup>k</sup>                                   | 0.118<br>D<br>DC  | 0/46/282812<br>0/2/6501    | G<br>-<br>B                                                            | Index ind.<br>F             | 157                            | N/A; N/A                                         | L hydronephrosis<br>and VUR grade 5,<br>R MCDK | Cleft lip, inguinal<br>hernia                                                                                                                        | <i>Novel</i>                     |
| B3543 <sup>g</sup> | <b>GLI3</b>   | HET              | c.308C>T<br>p.Pro103Leu<br>rs755154814          | D. r.                                                | 0.998<br>D<br>DC  | 0/3/279724<br>-            | G<br>-<br>VUS                                                          | Index ind.<br>F             | 133                            | WT; HET                                          | R VUR grade 5                                  | Tracheoesophageal<br>fistula, esophageal<br>atresia, atrial septal<br>defect, patent ductus<br>arteriosus,<br>imperforate anus,<br>failure to thrive | <i>Novel</i>                     |
| B3258 <sup>g</sup> | <b>GREB1L</b> | HET              | c.2939A>G<br>p.Asp980Gly<br>-                   | D. r.                                                | 0.998<br>D<br>DC  | -<br>-                     | G<br>-<br>VUS                                                          | Index ind.<br>F             | 55                             | N/A; N/A                                         | Unilateral MCDK                                | -                                                                                                                                                    | <i>Novel</i>                     |
| B3652 <sup>g</sup> | <b>GREB1L</b> | HET              | c.1241T>C<br>p.Val414Ala<br>rs777013152         | D. r.                                                | 0.998<br>D<br>DC  | 0/16/188370<br>-           | G<br>-<br>B                                                            | Index ind.<br>M             | 12                             | HET; WT                                          | BL echogenic<br>kidneys with cysts,<br>R VUR   | -                                                                                                                                                    | <i>Novel</i>                     |
| B3233 <sup>g</sup> | <b>GREB1L</b> | HET              | c.2992G>A<br>p.Glu998Lys<br>rs758445815         | D. r.                                                | 1.000<br>D<br>DC  | 0/14/186570<br>-           | G<br>-<br>B                                                            | Index ind.<br>M             | 6                              | HET; WT                                          | R ectopic and<br>hypoplastic kidney            | -                                                                                                                                                    | <i>Novel</i>                     |
| B3165 <sup>g</sup> | <b>GREB1L</b> | HET <sup>l</sup> | c.2768C>T<br>p.Thr923Ile<br>rs1382291794        | D. r.                                                | 1.000<br>D<br>DC  | 0/1/157380<br>-            | G<br>-<br>VUS                                                          | Index ind.<br>M             | 5                              | WT; HET                                          | R VUR grade 2                                  | -                                                                                                                                                    | <i>Novel</i>                     |
| B3523 <sup>g</sup> | <b>GREB1L</b> | HET              | c.2360C>T<br>p.Thr787Met<br>rs144678858         | D. r.                                                | 0.999<br>D<br>DC  | 0/3/162894<br>-            | G<br>-<br>VUS                                                          | Index ind.<br>M             | 7                              | WT; HET                                          | L hydronephrosis                               | -                                                                                                                                                    | <i>Novel</i>                     |
| B4048 <sup>g</sup> | <b>GREB1L</b> | HET              | c.722G>A<br>p.Arg241Gln<br>rs147048716          | D. r. <sup>m</sup>                                   | 0.986<br>D<br>DC  | 0/16/157328<br>0/1/2282    | G<br>-<br>B                                                            | Index ind.<br>M             | 18                             | HET; WT                                          | R VUR grade 3-4,<br>BL<br>hydronephrosis       | -                                                                                                                                                    | <i>Novel</i>                     |
| B808 <sup>g</sup>  | <b>GREB1L</b> | HET              | c.100C>T<br>p.Arg34Trp<br>rs559234950           | X. t.                                                | 0.971<br>D<br>DC  | 0/6/188054<br>-            | G<br>-<br>B                                                            | Index ind.<br>M             | 1                              | N/A; N/A                                         | BL VUR grade 2-3                               | -                                                                                                                                                    | <i>Novel</i>                     |

| Family             | Gene          | Zygo-<br>sity             | Nucleotide<br>change<br>Protein change<br>dbSNP                  | Amino<br>acid<br>con-<br>serva-<br>tion <sup>a</sup> | PP2<br>SIFT<br>MT | gnomAD <sup>b</sup><br>EVS | HGMD <sup>c</sup><br>ClinVar <sup>d</sup><br>ACMG/<br>AMP <sup>e</sup> | Pedigree<br>relation<br>Sex | Homo-<br>zygo-<br>sity<br>[Mb] | Segregation<br>maternal;<br>paternal;<br>(other)     | Renal phenotype                                  | Extrarenal<br>phenotype                                                                                                                            | Reference<br>[PMID] <sup>f</sup>           |              |
|--------------------|---------------|---------------------------|------------------------------------------------------------------|------------------------------------------------------|-------------------|----------------------------|------------------------------------------------------------------------|-----------------------------|--------------------------------|------------------------------------------------------|--------------------------------------------------|----------------------------------------------------------------------------------------------------------------------------------------------------|--------------------------------------------|--------------|
| B1083 <sup>9</sup> | <b>GREB1L</b> | HET                       | c.5486A>G<br>p.Tyr1829Cys<br>rs769118539                         | D. r.                                                | 0.999<br>D<br>DC  | 0/2/154038<br>-            | G<br>-<br>VUS                                                          | Index ind.<br>F             | 12                             | N/A; N/A                                             | R hypodysplastic<br>kidney with VUR              | -                                                                                                                                                  | <i>Novel</i>                               |              |
| B462 <sup>9</sup>  | <b>GREB1L</b> | HET                       | c.2510G>A<br>p.Arg837His<br>rs1297427942                         | D. r. <sup>n</sup>                                   | 0.897<br>D<br>DC  | 0/2/156490<br>-            | G<br>-<br>VUS                                                          | Index ind.<br>F             | 11                             | N/A; N/A                                             | L non-obstructive<br>duplex collecting<br>system | Polythelia                                                                                                                                         | <i>Novel</i>                               |              |
| B3749              | <b>GREB1L</b> | HET                       | c.5323G>A<br>p.Asp1775Asn<br>-                                   | D. r.                                                | 1.000<br>D<br>DC  | -<br>-                     | DM<br>-<br>LP                                                          | Index ind.<br>M             | 20                             | N/A; N/A                                             | BL VUR                                           | -                                                                                                                                                  | 29100091<br><sup>225</sup>                 |              |
| B3348              | <b>HNF1B</b>  | <i>De<br/>novo</i><br>HET | c.840_844del<br>CTCCA<br>p.Lys282Pro<br>fs*10<br>-               | -                                                    | -<br>-<br>-       | -<br>-                     | G<br>-<br>P                                                            | Index ind.<br>F             | 9                              | WT; WT                                               | BL renal<br>hypodysplasia,<br>hyperuricemia      | -                                                                                                                                                  | <i>Novel</i>                               |              |
| A1315              | <b>HNF1B</b>  | HET                       | c.1006C>G<br>p.His336Asp<br>rs138986885                          | D. r.                                                | 0.182<br>T<br>-   | 1/59/281558<br>0/3/6500    | DM<br>US/B<br>VUS                                                      | Index ind.<br>M             | 7                              | WT; HET;<br>affected<br>brother:<br>HET <sup>o</sup> | L UPJO                                           | -                                                                                                                                                  | 16971658<br><sup>226</sup>                 |              |
| B3830_<br>B3948    | <b>HPSE2</b>  | HOM                       | Exon 9 deletion <sup>p</sup>                                     |                                                      |                   |                            |                                                                        |                             | Index ind.<br>M                | 134                                                  | N/A; N/A                                         | Neurogenic<br>bladder, BL renal<br>pelvis dilation                                                                                                 | Inverted smile,<br>hemoglobin H<br>disease | <i>Novel</i> |
| B717 <sup>9</sup>  | <b>JAG1</b>   | HET                       | c.2413C>G<br>p.Arg805Gly<br>-                                    | D. r.                                                | 0.996<br>D<br>DC  | -<br>-                     | G<br>-<br>VUS                                                          | Index ind.<br>M             | 3                              | N/A; N/A                                             | Renal dysplasia,<br>echogenic kidney             | Developmental<br>delay, intellectual<br>disability, coarctation<br>of the aorta,<br>ventricular septal<br>defect, peripheral<br>pulmonary stenosis | <i>Novel</i>                               |              |
| B345 <sup>9</sup>  | <b>KAT6B</b>  | HET                       | c.3994C>T<br>p.Pro1332Ser<br>rs764565963                         | G. g.                                                | 0.986<br>D<br>DC  | 0/6/251384<br>-            | G<br>-<br>LB                                                           | Index ind.<br>F             | 4                              | N/A; N/A                                             | R hypoplastic<br>kidney with VUR                 | Intellectual disability,<br>growth retardation,<br>hearing loss,<br>polydactyly/<br>syndactyly                                                     | <i>Novel</i>                               |              |
| B2758              | <b>KDM5C</b>  | HEMI                      | c.938G>A<br>p.Arg313Gln<br>-                                     | D. r. <sup>q</sup>                                   | 0.980<br>D<br>DC  | 0/2/241938<br>-            | G<br>-<br>VUS                                                          | Index ind.<br>M             | 246                            | N/A; N/A                                             | Epispadias,<br>cryptorchidism,<br>micropenis     | Microcephaly, facial<br>dysmorphism,<br>strabismus, skeletal<br>deformity, growth<br>retardation,<br>developmental<br>delay, clubfoot              | <i>Novel</i>                               |              |
| B2587 <sup>9</sup> | <b>MYCN</b>   | HET                       | c.816_821del<br>TGAAGA<br>p.Asp272_<br>Glu273del<br>rs1267141762 | -                                                    | -<br>-<br>-       | 0/1/246346<br>-            | G<br>-<br>VUS                                                          | Index ind.<br>M             | 203                            | N/A; N/A                                             | Horseshoe kidney                                 | Microcephaly,<br>developmental<br>delay, growth<br>retardation                                                                                     | <i>Novel</i>                               |              |

| Family             | Gene          | Zygo-<br>sity             | Nucleotide<br>change<br>Protein change<br>dbSNP | Amino<br>acid<br>con-<br>serva-<br>tion <sup>a</sup> | PP2<br>SIFT<br>MT | gnomAD <sup>b</sup><br>EVS | HGMD <sup>c</sup><br>ClinVar <sup>d</sup><br>ACMG/<br>AMP <sup>e</sup> | Pedigree<br>relation<br>Sex  | Homo-<br>zygo-<br>sity<br>[Mb] | Segregation<br>maternal;<br>paternal;<br>(other) | Renal phenotype                                                                                                                                             | Extrarenal<br>phenotype                                                                                                                               | Reference<br>[PMID] <sup>f</sup> |
|--------------------|---------------|---------------------------|-------------------------------------------------|------------------------------------------------------|-------------------|----------------------------|------------------------------------------------------------------------|------------------------------|--------------------------------|--------------------------------------------------|-------------------------------------------------------------------------------------------------------------------------------------------------------------|-------------------------------------------------------------------------------------------------------------------------------------------------------|----------------------------------|
| B1099 <sup>g</sup> | <b>NOTCH2</b> | HET                       | c.2906A>G<br>p.Asn969Ser<br>rs142978777         | D. r.                                                | 0.119<br>D<br>DC  | 0/5/251436<br>0/1/6502     | R<br>-<br>VUS                                                          | Index ind.<br>F              | 5                              | WT; N/A                                          | L renal agenesis,<br>R cystic kidney,<br>neurogenic<br>bladder,<br>duplicated internal<br>genitalia                                                         | Esophageal<br>strictures, tetralogy<br>of Fallot,<br>kyphoscoliosis,<br>sacral agenesis,<br>imperforate anus,<br>hirsutism                            | <i>Novel</i>                     |
| B3775              | <b>PAX2</b>   | <i>De<br/>novo</i><br>HET | c.76dup<br>p.Val26Glyfs*28<br>rs768607170       | -                                                    | -<br>-<br>-       | 0/7/246960<br>-            | DM <sup>r</sup><br>PATH<br>P                                           | Index ind.<br>F              | 5                              | WT; WT; two<br>unaffected<br>siblings: WT        | R MCDK                                                                                                                                                      | Retinal coloboma,<br>morbid obesity                                                                                                                   | 8589702 <sup>42</sup>            |
| B3358              | <b>PAX2</b>   | HET                       | c.76dup<br>p.Val26Glyfs*28<br>rs768607170       | -                                                    | -<br>-<br>-       | 0/7/246960<br>-            | DM <sup>r</sup><br>PATH<br>P                                           | Index ind.<br>F              | 7                              | N/A; N/A                                         | L MCDK, R<br>hydronephrosis                                                                                                                                 | -                                                                                                                                                     | 8589702 <sup>42</sup>            |
| B1677              | <b>PAX2</b>   | HET                       | c.76dup<br>p.Val26Glyfs*28<br>rs768607170       | -                                                    | -<br>-<br>-       | 0/7/246960<br>-            | DM <sup>r</sup><br>PATH<br>P                                           | Index ind.<br>M              | 133                            | N/A; N/A                                         | BL MCDK                                                                                                                                                     | Optic disc coloboma,<br>myopia, nystagmus,<br>blindness                                                                                               | 8589702 <sup>42</sup>            |
| B4069 <sup>g</sup> | <b>PAX2</b>   | HET                       | c.1123C>A<br>p.Pro375Thr<br>rs745392326         | D. m.                                                | 0.169<br>D<br>-   | 0/1/249426<br>-            | G<br>-<br>VUS                                                          | Index ind.<br>M              | 98                             | HET; N/A                                         | L duplex collecting<br>system and ureter<br>with hydroureters<br>and<br>hydronephrosis                                                                      | Skeletal deformity,<br>growth retardation,<br>Fanconi anemia                                                                                          | <i>Novel</i>                     |
| B4111              | <b>PAX2</b>   | HET                       | c.183C>A<br>p.Ser61Arg<br>-                     | D. m.                                                | 0.998<br>D<br>-   | -<br>-                     | DM<br>-<br>LP                                                          | Index ind.<br>M              | 7                              | WT; HET                                          | PUV                                                                                                                                                         | Strabismus,<br>suspected optic disc<br>atrophy                                                                                                        | 28566479<br><sup>43</sup>        |
| B2446              | <b>PAX2</b>   | HET                       | c.213-1G>A<br>p.?<br>-                          | -                                                    | -<br>-<br>-       | -<br>-                     | R<br>-<br>P                                                            | Index ind.<br>M              | 10                             | HET; WT                                          | BL renal<br>hypodysplasia                                                                                                                                   | BL optic disc<br>coloboma, global<br>developmental delay                                                                                              | <i>Novel</i>                     |
|                    |               |                           |                                                 |                                                      |                   |                            |                                                                        | Mother of<br>index ind.<br>F | 9                              | N/A; N/A;<br>affected son:<br>HET                | End-stage renal<br>disease of<br>unknown cause                                                                                                              | -                                                                                                                                                     |                                  |
| B1680              | <b>PBX1</b>   | <i>De<br/>novo</i><br>HET | c.862C>T<br>p.Arg288*<br>rs1259895025           | -                                                    | -<br>-<br>-       | 0/1/31382<br>-             | DM<br>-<br>P                                                           | Index ind.<br>F              | 332                            | WT; WT                                           | L UVJO                                                                                                                                                      | Abnormally shaped<br>ears                                                                                                                             | 29036646<br><sup>227</sup>       |
| B1127              | <b>PTEN</b>   | HET                       | c.492+1G>T<br>p.?<br>-                          | -                                                    | -<br>-<br>-       | -<br>-                     | DM<br>PATH<br>P                                                        | Index ind.<br>F              | 4                              | HET; N/A                                         | Crossed fused<br>ectopia with small<br>and scarred L<br>moiety, BL VUR,<br>vaginal agenesis,<br>Mayer-<br>Rockitansky-<br>Kuster syndrome<br>(OMIM: 277000) | Facial dysmorphism,<br>progressive<br>macrocephaly,<br>tracheo-esophageal<br>fistula, esophageal<br>atresia, vertebral<br>anomalies, tethered<br>cord | 28677221<br><sup>228</sup>       |
| A608               | <b>PTPN11</b> | HET                       | c.1226G>C<br>p.Gly409Ala<br>rs201247699         | D. r.                                                | 0.054<br>D<br>DC  | 0/16/250808<br>0/2/6501    | DM<br>US<br>VUS                                                        | Index ind.<br>F              | 19                             | WT; HET                                          | R VUR grade 3                                                                                                                                               | L auricular cyst                                                                                                                                      | 17052965<br><sup>229</sup>       |

| Family              | Gene          | Zygo-<br>sity | Nucleotide<br>change<br>Protein change<br>dbSNP | Amino<br>acid<br>con-<br>serva-<br>tion <sup>a</sup> | PP2<br>SIFT<br>MT | gnomAD <sup>b</sup><br>EVS | HGMD <sup>c</sup><br>ClinVar <sup>d</sup><br>ACMG/<br>AMP <sup>e</sup> | Pedigree<br>relation<br>Sex | Homo-<br>zygo-<br>sity<br>[Mb] | Segregation<br>maternal;<br>paternal;<br>(other) | Renal phenotype                                                                                        | Extrarenal<br>phenotype                                                                                                                                                                        | Reference<br>[PMID] <sup>f</sup> |
|---------------------|---------------|---------------|-------------------------------------------------|------------------------------------------------------|-------------------|----------------------------|------------------------------------------------------------------------|-----------------------------|--------------------------------|--------------------------------------------------|--------------------------------------------------------------------------------------------------------|------------------------------------------------------------------------------------------------------------------------------------------------------------------------------------------------|----------------------------------|
| B3947               | <b>PTPN11</b> | HET           | c.5C>T<br>p.Thr2Ile<br>rs267606990              | X. t.                                                | 0.031<br>T<br>-   | -<br>-                     | DM<br>PATH<br>P                                                        | Index ind.<br>F             | 50                             | HET; WT                                          | BL<br>hydronephrosis, L<br>VUR grade 5, L<br>hydroureter                                               | Microcephaly, ptosis,<br>myopia, widely<br>spaced teeth, pectus<br>carinatum                                                                                                                   | 12960218<br><sup>230</sup>       |
| B3546x <sub>g</sub> | <b>ROBO2</b>  | HET           | c.2261C>G<br>p.Ala742Gly<br>rs750635483         | D. r.                                                | -<br>T<br>DC      | 0/1/249024<br>-            | G<br>-<br>VUS                                                          | Index ind.<br>M             | 12                             | N/A; N/A                                         | BL VUR and<br>hydronephrosis                                                                           | -                                                                                                                                                                                              | <i>Novel</i>                     |
| B2626 <sup>g</sup>  | <b>ROBO2</b>  | HET           | c.1331C>T<br>p.Thr444Met<br>rs755515210         | D. r.                                                | -<br>D<br>DC      | 0/2/248992<br>-            | G<br>-<br>VUS                                                          | Index ind.<br>M             | 8                              | N/A; N/A                                         | BL VUR                                                                                                 | -                                                                                                                                                                                              | <i>Novel</i>                     |
| B592 <sup>g</sup>   | <b>ROBO2</b>  | HET           | c.3677C>G<br>p.Ser1226Cys<br>rs755603547        | D. r.                                                | 0.999<br>D<br>DC  | 0/4/249412<br>-            | G<br>-<br>VUS                                                          | Index ind.<br>M             | 7                              | N/A; N/A                                         | BL VUR grade 4                                                                                         | -                                                                                                                                                                                              | <i>Novel</i>                     |
| B2813 <sup>g</sup>  | <b>ROBO2</b>  | HET           | c.1468C>A<br>p.Gln490Lys<br>rs774652786         | D. r. <sup>s</sup>                                   | 0.106<br>T<br>DC  | 0/12/279878<br>-           | G<br>-<br>LB                                                           | Index ind.<br>M             | 6                              | HET; N/A                                         | R VUR and<br>hydronephrosis                                                                            | -                                                                                                                                                                                              | <i>Novel</i>                     |
| B2419 <sup>g</sup>  | <b>ROBO2</b>  | HET           | c.3394C>A<br>p.Gln1132Lys<br>rs777186201        | D. r.                                                | 0.155<br>T<br>DC  | 0/1/249500<br>-            | G<br>-<br>VUS                                                          | Index ind.<br>M             | 17                             | HET; WT;<br>unaffected<br>sister: WT             | L UPJO                                                                                                 | -                                                                                                                                                                                              | <i>Novel</i>                     |
| B2411 <sup>g</sup>  | <b>ROBO2</b>  | HET           | c.598C>T<br>p.Arg200Cys<br>rs763574051          | D. r.                                                | 0.997<br>T<br>DC  | 0/1/249134<br>-            | G<br>-<br>VUS                                                          | Index ind.<br>F             | 4                              | WT; HET                                          | L renal agenesis,<br>R UPJO                                                                            | -                                                                                                                                                                                              | <i>Novel</i>                     |
| A4855 <sup>g</sup>  | <b>ROBO2</b>  | HET           | c.3280C>A<br>p.Pro1094Thr<br>rs200040879        | D. r.                                                | -<br>T<br>DC      | 0/5/280854<br>0/2/5916     | G<br>-<br>VUS                                                          | Index ind.<br>M             | 9                              | WT; HET                                          | L renal agenesis                                                                                       | -                                                                                                                                                                                              | <i>Novel</i>                     |
| B3608 <sup>g</sup>  | <b>SALL1</b>  | HET           | c.3802G>A<br>p.Gly1268Ser<br>rs764123321        | D. r.                                                | 0.588<br>D<br>DC  | 0/6/282850<br>-            | G<br>-<br>B                                                            | Index ind.<br>F             | 2                              | HET; N/A                                         | L renal agenesis,<br>R renal hypoplasia<br>and VUR with<br>hydronephrosis,<br>hypotrophic<br>genitalia | Patent ductus<br>arteriosus, dilated L<br>ventricle, imperforate<br>anus, cloacal<br>malformation                                                                                              | <i>Novel</i>                     |
| B656 <sup>g</sup>   | <b>SALL1</b>  | HET           | c.2941A>G<br>p.Ile981Val<br>rs772457413         | X. t.                                                | 0.184<br>D<br>DC  | 0/3/282574<br>-            | G<br>-<br>LB                                                           | Index ind.<br>M             | 6                              | N/A; N/A                                         | L VUR grade 5<br>and<br>hydronephrosis, R<br>atrophic kidney                                           | Patent ductus<br>arteriosus, atrial<br>septal defect,<br>chronic<br>ventriculomegaly,<br>chronic lung<br>disease, ileal<br>atresia, congenital<br>hernia, hip<br>abnormalities, BL<br>clubfoot | <i>Novel</i>                     |

| Family             | Gene         | Zygo-<br>sity             | Nucleotide<br>change<br>Protein change<br>dbSNP | Amino<br>acid<br>con-<br>serva-<br>tion <sup>a</sup> | PP2<br>SIFT<br>MT | gnomAD <sup>b</sup><br>EVS | HGMD <sup>c</sup><br>ClinVar <sup>d</sup><br>ACMG/<br>AMP <sup>e</sup> | Pedigree<br>relation<br>Sex | Homo-<br>zygo-<br>sity<br>[Mb] | Segregation<br>maternal;<br>paternal;<br>(other) | Renal phenotype                                                 | Extrarenal<br>phenotype                                                                                                        | Reference<br>[PMID] <sup>f</sup> |
|--------------------|--------------|---------------------------|-------------------------------------------------|------------------------------------------------------|-------------------|----------------------------|------------------------------------------------------------------------|-----------------------------|--------------------------------|--------------------------------------------------|-----------------------------------------------------------------|--------------------------------------------------------------------------------------------------------------------------------|----------------------------------|
| B2583              | <b>SALL1</b> | <i>De<br/>novo</i><br>HET | c.1508dup<br>p.Tyr503*<br>-                     | -                                                    | -<br>-<br>-       | -<br>-                     | DM <sup>t</sup><br>-<br>P                                              | Index ind.<br>M             | 136                            | WT; WT;<br>three<br>unaffected<br>siblings: WT   | BL VUR, L UPJO                                                  | Facial dysmorphism,<br>low set ears,<br>developmental<br>delay, ventricular<br>septal defect,<br>imperforate anus,<br>clubfoot | <i>Novel</i>                     |
| B1770              | <b>SALL1</b> | HET                       | c.1209del<br>p.Ser404Ala<br>fs*13<br>-          | -                                                    | -<br>-<br>-       | -<br>-                     | G<br>-<br>P                                                            | Index ind.<br>F             | 7                              | WT; N/A                                          | L hypoplastic<br>ectopic kidney                                 | Low set ears, patent<br>ductus arteriosus, R<br>preaxial thumb<br>polydactyly,<br>imperforate anus                             | <i>Novel</i>                     |
| B961 <sup>9</sup>  | <b>SALL1</b> | HET                       | c.1129G>C<br>p.Ala377Pro<br>-                   | X. t.                                                | 0.012<br>D<br>DC  | -<br>-                     | G<br>-<br>LB                                                           | Index ind.<br>F             | 16                             | HET; N/A                                         | BL dysplastic and<br>echogenic kidneys                          | Townes-Brocks<br>syndrome<br>(OMIM: 107480)                                                                                    | <i>Novel</i>                     |
| B3862 <sup>9</sup> | <b>SALL4</b> | HET                       | c.986G>A<br>p.Arg329His<br>rs376519013          | C. i.                                                | 1.000<br>T<br>-   | 0/26/282110<br>0/2/6501    | G<br>-<br>B                                                            | Index ind.<br>F             | 3                              | N/A; N/A                                         | BL VUR                                                          | Scoliosis                                                                                                                      | <i>Novel</i>                     |
| B595 <sup>9</sup>  | <b>SF3B4</b> | HET                       | c.231C>G<br>p.Ile77Met<br>-                     | D. m.                                                | 0.771<br>D<br>DC  | -<br>-                     | G<br>-<br>LB                                                           | Index ind.<br>F             | 1                              | N/A; N/A                                         | BL<br>hydronephrosis,<br>bladder exstrophy                      | Butterfly vertebral<br>anomaly, short gut<br>syndrome,<br>omphalocele,<br>doubling of uterus,<br>cloacal malformation          | <i>Novel</i>                     |
| B594 <sup>9</sup>  | <b>SIX1</b>  | HET                       | c.37C>A<br>p.Gln13Lys<br>rs1480942237           | D. m.                                                | 0.937<br>D<br>DC  | -<br>-                     | G<br>-<br>VUS                                                          | Index ind.<br>M             | 8                              | N/A; N/A                                         | L hypoplastic<br>kidney                                         | Tetralogy of Fallot                                                                                                            | <i>Novel</i>                     |
| B3353 <sup>9</sup> | <b>SIX1</b>  | HET                       | c.191G>A<br>p.Arg64His<br>rs1051653507          | C. i.                                                | 0.071<br>D<br>DC  | 0/5/282762<br>-            | G<br>US<br>VUS                                                         | Index ind.<br>F             | 6                              | WT; N/A                                          | BL VUR                                                          | -                                                                                                                              | <i>Novel</i>                     |
| B3892 <sup>9</sup> | <b>SLIT2</b> | HET                       | c.705G>T<br>p.Gln235His<br>-                    | C. e.                                                | 0.980<br>T<br>-   | -<br>-                     | G<br>-<br>VUS                                                          | Index ind.<br>M             | 18                             | WT; HET                                          | L renal agenesis,<br>malrotated R<br>kidney with<br>ureterocele | -                                                                                                                              | <i>Novel</i>                     |
| B332 <sup>9</sup>  | <b>SOX17</b> | HET                       | c.322G>A<br>p.Ala108Thr<br>rs1309570757         | D. r.                                                | 0.907<br>D<br>DC  | -<br>-                     | G<br>-<br>VUS                                                          | Index ind.<br>M             | 5                              | HET; WT                                          | Megaureter, BL<br>VUR                                           | -                                                                                                                              | <i>Novel</i>                     |
| B3501 <sup>9</sup> | <b>SOX17</b> | HET                       | c.188A>G<br>p.Lys63Arg<br>rs754603226           | C. i. <sup>u</sup>                                   | 0.959<br>D<br>DC  | 0/2/240692<br>-            | G<br>-<br>VUS                                                          | Index ind.<br>F             | 5                              | N/A; N/A                                         | L VUR grade 3                                                   | -                                                                                                                              | <i>Novel</i>                     |
| B3182 <sup>9</sup> | <b>SRCAP</b> | HET                       | c.3694C>T<br>p.Arg1232Cys<br>rs1324080441       | C. i. <sup>v</sup>                                   | 0.972<br>D<br>DC  | 0/1/250984<br>-            | G<br>-<br>VUS                                                          | Index ind.<br>M             | 8                              | WT; HET                                          | L UVJO                                                          | Low posterior<br>hairline, triangular<br>face, long<br>eyelashes,<br>prominent nose, thin<br>lips                              | <i>Novel</i>                     |

| Family             | Gene          | Zygo-<br>sity | Nucleotide<br>change<br>Protein change<br>dbSNP      | Amino<br>acid<br>con-<br>serva-<br>tion <sup>a</sup> | PP2<br>SIFT<br>MT | gnomAD <sup>b</sup><br>EVS | HGMD <sup>c</sup><br>ClinVar <sup>d</sup><br>ACMG/<br>AMP <sup>e</sup> | Pedigree<br>relation<br>Sex | Homo-<br>zygo-<br>sity<br>[Mb] | Segregation<br>maternal;<br>paternal;<br>(other) | Renal phenotype                                               | Extrarenal<br>phenotype                                                                                               | Reference<br>[PMID] <sup>f</sup> |
|--------------------|---------------|---------------|------------------------------------------------------|------------------------------------------------------|-------------------|----------------------------|------------------------------------------------------------------------|-----------------------------|--------------------------------|--------------------------------------------------|---------------------------------------------------------------|-----------------------------------------------------------------------------------------------------------------------|----------------------------------|
| B3112 <sup>g</sup> | <b>SRGAP1</b> | HET           | c.550G>A<br>p.Glu184Lys<br>-                         | D. r.                                                | 0.229<br>T<br>DC  | -<br>-                     | G<br>-<br>VUS                                                          | Index ind.<br>M             | 174                            | N/A; N/A                                         | BL hydrouretero-<br>nephrosis                                 | -                                                                                                                     | <i>Novel</i>                     |
| A3889 <sup>g</sup> | <b>SRGAP1</b> | HET           | c.268G>A<br>p.Asp90Asn<br>-                          | C. i.                                                | 0.936<br>T<br>DC  | -<br>-                     | G<br>-<br>VUS                                                          | Index ind.<br>M             | 5                              | N/A; N/A                                         | PUV                                                           | -                                                                                                                     | <i>Novel</i>                     |
| B3621 <sup>g</sup> | <b>SRGAP1</b> | HET           | c.2197G>T<br>p.Gly733Cys<br>-                        | D. r. <sup>w</sup>                                   | 0.627<br>D<br>DC  | -<br>-                     | G<br>-<br>VUS                                                          | Index ind.<br>F             | 10                             | N/A; N/A                                         | L MCDK, R renal<br>stones                                     | Femoral facial<br>syndrome<br>(OMIM: 134780),<br>cleft palate, skeletal<br>dysplasia                                  | <i>Novel</i>                     |
| A1958              | <b>SRGAP1</b> | HET           | c.806G>A<br>p.Cys269Tyr<br>-                         | D. r.                                                | 0.840<br>T<br>DC  | -<br>-                     | DM<br>PATH<br>LP                                                       | Index ind.<br>M             | 28                             | WT; HET                                          | R VUR grade 3                                                 | -                                                                                                                     | 26026792<br><sup>28</sup>        |
| B806 <sup>g</sup>  | <b>SRGAP1</b> | HET           | c.1850G>A<br>p.Arg617His<br>rs201404379              | C. i.                                                | 1.000<br>T<br>DC  | 0/31/280932<br>0/2/6501    | G<br>-<br>VUS                                                          | Index ind.<br>F             | 4                              | N/A; N/A                                         | R UPJO                                                        | -                                                                                                                     | <i>Novel</i>                     |
| B3057 <sup>g</sup> | <b>SRGAP1</b> | HET           | c.1762G>A<br>p.Glu588Lys<br>rs371344520              | C. e.                                                | 0.665<br>T<br>DC  | 0/4/251014<br>0/1/4299     | G<br>-<br>VUS                                                          | Index ind.<br>F             | 10                             | HET; WT                                          | BL VUR                                                        | -                                                                                                                     | <i>Novel</i>                     |
| B3119 <sup>g</sup> | <b>TBX18</b>  | HET           | c.787A>G<br>p.Met263Val<br>rs1465314738              | D. m.                                                | 0.991<br>D<br>DC  | 0/1/249930<br>-            | G<br>-<br>VUS                                                          | Index ind.<br>F             | 5                              | HET; N/A                                         | BL VUR                                                        | -                                                                                                                     | <i>Novel</i>                     |
| B3628 <sup>g</sup> | <b>TBX18</b>  | HET           | c.821G>T<br>p.Arg274Leu<br>rs200317774               | D. r.                                                | 0.983<br>D<br>DC  | 0/20/282454<br>-           | G<br>-<br>LB                                                           | Index ind.<br>F             | 13                             | HET; N/A                                         | BL VUR grade 3                                                | -                                                                                                                     | <i>Novel</i>                     |
| B4079 <sup>g</sup> | <b>TBX18</b>  | HET           | c.1179_1181del<br>CTC<br>p.Ser394del<br>rs1459853324 | -                                                    | -<br>-<br>-       | -<br>-                     | G<br>-<br>VUS                                                          | Index ind.<br>F             | 11                             | WT; HET                                          | R VUR grade 3                                                 | -                                                                                                                     | <i>Novel</i>                     |
| B4148 <sup>g</sup> | <b>TP63</b>   | HET           | c.473C>T<br>p.Ala158Val<br>rs767384779               | D. r.                                                | 0.447<br>D<br>DC  | 0/3/251428<br>-            | G<br>-<br>VUS                                                          | Index ind.<br>M             | 104                            | WT; HET                                          | L renal agenesis,<br>R VUR grade 4-5<br>and<br>hydronephrosis | Photophobia,<br>blepharitis,<br>strabismus, low set<br>ears, short neck,<br>malformed auricles,<br>growth retardation | <i>Novel</i>                     |
| B1825              | <b>TRAP1</b>  | HET           | c.1018C>T<br>p.Arg340Cys<br>rs775599442              | C. e.                                                | 0.985<br>D<br>DC  | 0/4/250926<br>-            | G<br>-<br>VUS                                                          | Index ind.<br>M             | 66                             | WT; HET                                          | Prenatal BL<br>hydronephrosis                                 | -                                                                                                                     | <i>Novel</i>                     |
|                    |               | HET           | c.383G>A<br>p.Arg128His<br>rs61758086                | S. c.                                                | 0.991<br>D<br>DC  | 6/848/282796<br>0/19/6478  | G<br>LB<br>B                                                           |                             |                                | HET; WT                                          |                                                               |                                                                                                                       | <i>Novel</i>                     |

| Family             | Gene         | Zygo-<br>sity | Nucleotide<br>change<br>Protein change<br>dbSNP | Amino<br>acid<br>con-<br>serva-<br>tion <sup>a</sup> | PP2<br>SIFT<br>MT | gnomAD <sup>b</sup><br>EVS | HGMD <sup>c</sup><br>ClinVar <sup>d</sup><br>ACMG/<br>AMP <sup>e</sup> | Pedigree<br>relation<br>Sex | Homo-<br>zygo-<br>sity<br>[Mb] | Segregation<br>maternal;<br>paternal;<br>(other) | Renal phenotype                       | Extrarenal<br>phenotype | Reference<br>[PMID] <sup>f</sup> |
|--------------------|--------------|---------------|-------------------------------------------------|------------------------------------------------------|-------------------|----------------------------|------------------------------------------------------------------------|-----------------------------|--------------------------------|--------------------------------------------------|---------------------------------------|-------------------------|----------------------------------|
| B3253              | <b>UPK3A</b> | HET           | c.227C>A<br>p.Ser76*<br>rs202189234             | -                                                    | -<br>-<br>-       | 0/23/251206<br>0/1/6502    | DM<br>-<br>LB                                                          | Index ind.<br>F             | 10                             | HET; N/A                                         | BL VUR                                | -                       | 26489027<br>232                  |
| B3283 <sup>g</sup> | <b>WNT4</b>  | HET           | c.125C>T<br>p.Thr42Met<br>rs1453786532          | D. r.                                                | 0.759<br>D<br>DC  | 0/1/251440<br>-            | G<br>-<br>VUS                                                          | Index ind.<br>M             | 9                              | HET; WT                                          | PUV, L UPJO and<br>VUR grade 3-4      | -                       | Novel                            |
| B3545x             | <b>WNT4</b>  | HET           | c.992A>T<br>p.His331Leu<br>rs1292945005         | D. r.                                                | 0.577<br>T<br>DC  | -<br>-                     | DM<br>-<br>VUS                                                         | Index ind.<br>F             | 10                             | N/A; N/A                                         | R renal agenesis,<br>L hydronephrosis | Hirsutism, acne         | 31130284<br>233                  |

-, not available/not reported; **BL**, bilateral; **DC**, disease-causing; **D**, deleterious; **EVS**, Exome Variant Server; **F**, female; **gnomAD**, Genome Aggregation Database; **HOM**, homozygous; **HET**, heterozygous; **ind**, individual; **L**, left; **M**, male; **MCDK**, multicystic dysplastic kidney; **MT**, MutationTaster; **N/A**, DNA for segregation analysis not available; **PMID**, PubMed Identifier; **PP2**, PolyPhen-2 **PUV**, posterior urethral valve; **R**, right; **SIFT**, Sorting intolerant from tolerant; **T**, tolerated; **UPJO**, uretero-pelvic junction obstruction; **UVJO**, uretero-vesical junction obstruction; **VUR**, vesicoureteral reflux; **WT**, wild type.

<sup>a</sup> Evolutionary amino acid conservation across phylogeny was assessed over *Mus musculus* (M. m.), *Gallus gallus* (G. g.), *Xenopus tropicalis* (X. t.), *Danio rerio* (D. r.), *Ciona intestinalis* (C. i.), *Caenorhabditis elegans* (C. e.), *Drosophila melanogaster* (D. m.), and *Saccharomyces cerevisiae* (S. c.). If continuous conservation is interrupted but otherwise preserved across phylogeny, additional information is provided.

<sup>b</sup> Allele frequencies in gnomAD and EVS are indicated with homozygous/hemizygous (if applicable)/heterozygous/total alleles detected.

<sup>c</sup> Indicates presence status in the Human Gene Mutation Database (HGMD®): **DM**, variant reported as disease-causing (reference for primary literature report is provided in 'Reference' column); **G**, the particular variant was not reported in the database but other disease-causing variants in the gene were previously reported; **R**, disease-causing variants were reported in the ±10 nucleotides vicinity of the nucleotide that harbors a variant here.

<sup>d</sup> ClinVar classification indicates that the variant has been reported to the ClinVar database as follows: **B**, benign; **LB**, likely benign; **US**, uncertain significance; **LP**, likely pathogenic; **PATH**, pathogenic.

<sup>e</sup> Indicates variant classification published by the American College of Medical Genetics and Genomics (ACMG) and the Association for Molecular Pathology (AMP): **B**, benign; **LB**, likely benign; **VUS**, variant of uncertain significance; **LP**, likely pathogenic; **P**, pathogenic.

<sup>f</sup> *Novel* indicates that, to our knowledge, the variant has not been reported in the literature before.

<sup>g</sup> In a clinical diagnostic setting, this variant would be classified as “variant of unknown significance” due to difficultly assessable pathogenicity (non-truncating heterozygous variant in a dominant gene with unproven *de novo* status and not previously reported in the literature).

<sup>h</sup> Interruption of conservation due to lysine present in *D. r.*

<sup>i</sup> The father was reported to be affected from deafness.

<sup>j</sup> Interruption of conservation due to proline present in *X. t.*

<sup>k</sup> Interruption of conservation due to leucine present in *C. e.*

<sup>l</sup> Variant confirmation with Sanger sequencing was not performed due to insufficient remaining DNA.

<sup>m</sup> Interruption of conservation due to phenylalanine present in *G. g.*

<sup>n</sup> Interruption of conservation due to lysine present in *X. t.*

<sup>o</sup> The father and paternal grandfather were reported to be affected from severe gout; the older brother of the proband was reported to be affected from left hydronephrosis, chronic kidney disease, and hyperuricemia.

<sup>p</sup> Homozygous exon deletion, which is predicted to result in no functional protein, was detected by absent ES sequencing coverage in this area and was confirmed by a polymerase chain reaction-based analysis.

<sup>q</sup> No existing orthologous gene in *G. g.*



<sup>r</sup> This variant is located within a stretch of seven consecutive G-C base pairs, thus the exact nucleotide in which this variant arose cannot be ascertained. Since the variant in family B3775 proved to be *de novo* and as several different truncating variants within this region were previously reported to be disease-causing, the area probably denotes a mutational hotspot.

<sup>s</sup> Interruption of conservation due to cysteine present in *X. t.*

<sup>t</sup> A truncating single nucleotide variant c.1509C>A that is predicted to result in the same protein change p.Y503\* was reported previously (PMID 10819639<sup>231</sup>).

<sup>u</sup> Interruption of conservation due to glycine present in *X. t.*

<sup>v</sup> Interruption of conservation due to leucine present in *G. g.*

<sup>w</sup> Interruption of conservation due to serine present in *G. g.*

**Table S7. 32 Families with isolated CAKUT and likely non-causative variants in candidate genes for syndromes with facultative CAKUT.**

Families are listed in alphabetical order by gene symbol.

| Family | Gene          | Zygo-<br>sity    | Nucleotide<br>change<br>Protein change<br>dbSNP | Amino<br>acid<br>con-<br>serva-<br>tion <sup>a</sup> | PP2<br>SIFT<br>MT | gnomAD <sup>b</sup><br>EVS | HGMD <sup>c</sup><br>ClinVar <sup>d</sup><br>ACMG/<br>AMP <sup>e</sup> | Pedigree<br>relation<br>Sex  | Homo-<br>zygo-<br>sity<br>[Mb] | Segregation<br>maternal;<br>paternal;<br>(other) | Renal phenotype                                                 | Extrarenal<br>phenotype | Reference<br>[PMID] <sup>f</sup> |
|--------|---------------|------------------|-------------------------------------------------|------------------------------------------------------|-------------------|----------------------------|------------------------------------------------------------------------|------------------------------|--------------------------------|--------------------------------------------------|-----------------------------------------------------------------|-------------------------|----------------------------------|
| B3506  | <b>ACTG1</b>  | HET <sup>g</sup> | c.389C>T<br>p.Pro130Leu<br>-                    | D. m.                                                | 1.000<br>D<br>DC  | 0/1/31404<br>-             | -<br>-<br>VUS                                                          | Index ind.<br>M              | 10                             | HET; WT                                          | L UPJO                                                          | -                       | <i>Novel</i>                     |
| A3464  | <b>ACTG2</b>  | HET              | c.752T>C<br>p.Ile251Thr<br>rs201286699          | X. t.                                                | 0.999<br>D<br>DC  | 0/5/249150<br>0/1/6502     | -<br>-<br>VUS                                                          | Index ind.<br>F              | 12                             | N/A; N/A                                         | L renal agenesis                                                | -                       | <i>Novel</i>                     |
| B720   | <b>ARID1B</b> | HET              | c.2675G>A<br>p.Gly892Asp<br>rs780312215         | D. r. <sup>h</sup>                                   | 1.000<br>T<br>-   | 0/2/31402<br>-             | G<br>-<br>VUS                                                          | Index ind.<br>M              | 2                              | WT; N/A                                          | PUV, R dysplastic kidney<br>with VUR grade 5 and<br>megaureters | -                       | <i>Novel</i>                     |
| B3399  | <b>BCOR</b>   | HEMI             | c.4631A>G<br>p.Glu1544Gly<br>-                  | C. i. <sup>i</sup>                                   | 0.866<br>D<br>DC  | -<br>-                     | G<br>-<br>VUS                                                          | Index ind.<br>M              | 15                             | HET; WT                                          | BL VUR and<br>hydronephrosis                                    | -                       | <i>Novel</i>                     |
| B2501  | <b>CHD7</b>   | HET              | c.6335C>T<br>p.Thr2112Met<br>rs758409717        | D. r.                                                | 0.781<br>T<br>DC  | 0/4/248948<br>-            | G<br>-<br>VUS                                                          | Index ind.<br>M              | 16                             | HET; WT                                          | PUV, BL VUR                                                     | -                       | <i>Novel</i>                     |
| B1778  | <b>CHD7</b>   | HET              | c.4870A>G<br>p.Ile1624Val<br>-                  | C. e.                                                | 0.898<br>D<br>DC  | -<br>-                     | G<br>-<br>VUS                                                          | Index ind.<br>M              | 175                            | N/A; N/A                                         | PUV, neurogenic bladder                                         | -                       | <i>Novel</i>                     |
| B3118  | <b>DACT1</b>  | HET              | c.7C>T<br>p.Pro3Ser<br>rs1247520462             | D. r.                                                | 0.998<br>D<br>DC  | -<br>-                     | G<br>-<br>LB                                                           | Index ind.<br>M              | 2                              | N/A; N/A                                         | L duplex kidney,<br>R renal hypodysplasia                       | -                       | <i>Novel</i>                     |
| B37    | <b>GLI3</b>   | HET              | c.892C>G<br>p.Pro298Ala<br>-                    | C. i.                                                | 0.975<br>D<br>DC  | -<br>-                     | G<br>-<br>VUS                                                          | Index ind.<br>F              | 4                              | HET; WT;<br>affected<br>sister: HET              | BL ureterocele                                                  | -                       | <i>Novel</i>                     |
|        |               |                  |                                                 |                                                      |                   |                            |                                                                        | Sister of<br>index ind.<br>F | 9                              | HET; WT;<br>affected<br>sister: HET              | BL UVJO                                                         | -                       |                                  |
|        |               |                  |                                                 |                                                      |                   |                            |                                                                        | Mother of<br>index ind.<br>F | 4                              | N/A; N/A;<br>two affected<br>daughters:<br>HET   | R duplex collecting system                                      | -                       |                                  |
| B1684  | <b>GLI3</b>   | HET              | c.1954C>A<br>p.Pro652Thr<br>rs552333286         | D. r.                                                | 0.940<br>D<br>DC  | 0/3/251278<br>-            | G<br>-<br>VUS                                                          | Index ind.<br>F              | 7                              | HET; N/A                                         | BL VUR, L hydronephrosis<br>and renal cysts                     | -                       | <i>Novel</i>                     |
| B3403  | <b>GLI3</b>   | HET              | c.2965C>T<br>p.Arg989Trp<br>rs1313713644        | D. r. <sup>j</sup>                                   | 0.582<br>D<br>DC  | -<br>-                     | G<br>-<br>VUS                                                          | Index ind.<br>F              | 7                              | HET; N/A                                         | BL VUR                                                          | -                       | <i>Novel</i>                     |

| Family | Gene         | Zygo-<br>sity    | Nucleotide<br>change<br>Protein change<br>dbSNP | Amino<br>acid<br>con-<br>serva-<br>tion <sup>a</sup> | PP2<br>SIFT<br>MT | gnomAD <sup>b</sup><br>EVS | HGMD <sup>c</sup><br>ClinVar <sup>d</sup><br>ACMG/<br>AMP <sup>e</sup> | Pedigree<br>relation<br>Sex  | Homo-<br>zygo-<br>sity<br>[Mb] | Segregation<br>maternal;<br>paternal;<br>(other) | Renal phenotype                               | Extrarenal<br>phenotype | Reference<br>[PMID] <sup>f</sup> |
|--------|--------------|------------------|-------------------------------------------------|------------------------------------------------------|-------------------|----------------------------|------------------------------------------------------------------------|------------------------------|--------------------------------|--------------------------------------------------|-----------------------------------------------|-------------------------|----------------------------------|
| B4106  | <b>GLI3</b>  | HET              | c.2584C>G<br>p.Arg862Gly<br>-                   | C. e.                                                | 1.000<br>D<br>DC  | -<br>-                     | G<br>-<br>VUS                                                          | Index ind.<br>M              | 5                              | HET; N/A                                         | BL VUR                                        | -                       | <i>Novel</i>                     |
| B3181  | <b>GLI3</b>  | HET              | c.1424A>T<br>p.Glu475Val<br>-                   | D. r.                                                | 0.159<br>D<br>DC  | -<br>-                     | G<br>-<br>VUS                                                          | Index ind.<br>M              | 20                             | HET; WT                                          | R hypoplastic kidney and<br>VUR grade 2       | -                       | <i>Novel</i>                     |
| B694   | <b>JAG1</b>  | HET              | c.2150G>C<br>p.Gly717Ala<br>rs200473477         | C. i.                                                | 0.988<br>D<br>DC  | 0/1/251488<br>-            | R<br>-<br>LP                                                           | Index ind.<br>M              | 10                             | N/A; N/A                                         | BL VUR                                        | -                       | <i>Novel</i>                     |
| B2314  | <b>KAL1</b>  | HEMI             | c.1345A>C<br>p.Lys449Gln<br>-                   | D. r. <sup>k</sup>                                   | 0.888<br>D<br>P   | 0/0/2/183354<br>-          | G<br>-<br>VUS                                                          | Index ind.<br>M              | 9                              | HET; WT                                          | BL renal hypodysplasia                        | -                       | <i>Novel</i>                     |
| B573   | <b>KCTD1</b> | HET              | c.1963A>G<br>p.Thr655Ala<br>rs771086832         | C. i.                                                | 0.997<br>D<br>DC  | 0/1/251040<br>-            | G<br>-<br>LP                                                           | Index ind.<br>M              | 6                              | HET; WT                                          | R anterior ureteral<br>obstruction            | -                       | <i>Novel</i>                     |
| B561   | <b>KDM6A</b> | HEMI             | c.1954G>T<br>p.Ala652Ser<br>-                   | D. r.                                                | 0.011<br>D<br>DC  | -<br>-                     | G<br>-<br>LB                                                           | Index ind.<br>M              | 8                              | N/A; N/A                                         | BL echogenic kidneys                          | -                       | <i>Novel</i>                     |
| B2790  | <b>MTOR</b>  | HET              | c.6856G>C<br>p.Val2286Leu<br>-                  | C. i.                                                | 1.000<br>D<br>DC  | -<br>-                     | G<br>-<br>VUS                                                          | Index ind.<br>F              | 11                             | HET; WT                                          | R ureterohydronephrosis                       | -                       | <i>Novel</i>                     |
|        |              |                  |                                                 |                                                      |                   |                            |                                                                        | Mother of<br>index ind.<br>F | 6                              | N/A; N/A;<br>affected<br>daughter:<br>HET        | L non-obstructive duplex<br>collecting system | -                       |                                  |
| B2448  | <b>MTOR</b>  | HET              | c.2762A>G<br>p.Lys921Arg<br>-                   | D. r.                                                | 0.973<br>T<br>DC  | -<br>-                     | G<br>-<br>VUS                                                          | Index ind.<br>M              | 11                             | HET; WT                                          | R renal agenesis,<br>L hydronephrosis         | -                       | <i>Novel</i>                     |
| B807   | <b>NIPBL</b> | HET              | c.8329G>T<br>p.Ala2777Ser<br>rs200872976        | D. r.                                                | 0.978<br>D<br>DC  | 0/6/282784<br>-            | R<br>-<br>VUS                                                          | Index ind.<br>M              | 7                              | N/A; N/A                                         | PUV, R renal agenesis,<br>L UPJO              | -                       | <i>Novel</i>                     |
| B3242  | <b>NIPBL</b> | HET <sup>g</sup> | c.5700G>C<br>p.Glu1900Asp<br>-                  | D. r.                                                | 0.847<br>D<br>DC  | -<br>-                     | R<br>-<br>VUS                                                          | Index ind.<br>M              | 7                              | HET; N/A                                         | PUV                                           | -                       | <i>Novel</i>                     |
| A560   | <b>NIPBL</b> | HET              | c.2521C>G<br>p.Arg841Gly<br>-                   | X. t.                                                | 0.319<br>D<br>DC  | -<br>-                     | G<br>-<br>VUS                                                          | Index ind.<br>F              | 17                             | N/A; N/A                                         | PUV                                           | -                       | <i>Novel</i>                     |

| Family | Gene          | Zygo-<br>sity | Nucleotide<br>change<br>Protein change<br>dbSNP | Amino<br>acid<br>con-<br>serva-<br>tion <sup>a</sup> | PP2<br>SIFT<br>MT | gnomAD <sup>b</sup><br>EVS | HGMD <sup>c</sup><br>ClinVar <sup>d</sup><br>ACMG/<br>AMP <sup>e</sup> | Pedigree<br>relation<br>Sex  | Homo-<br>zygo-<br>sity<br>[Mb] | Segregation<br>maternal;<br>paternal;<br>(other) | Renal phenotype                       | Extrarenal<br>phenotype | Reference<br>[PMID] <sup>f</sup> |
|--------|---------------|---------------|-------------------------------------------------|------------------------------------------------------|-------------------|----------------------------|------------------------------------------------------------------------|------------------------------|--------------------------------|--------------------------------------------------|---------------------------------------|-------------------------|----------------------------------|
| B4112  | <b>PIGT</b>   | HET           | c.934C>T<br>p.Arg312Trp<br>rs1377337561         | C. i. <sup>l</sup>                                   | 0.659<br>D<br>DC  | 0/2/251490<br>-            | G<br>-<br>VUS                                                          | Index ind.<br>M              | 12                             | HET; WT                                          | PUV, BL VUR and<br>hydronephrosis     | -                       | <i>Novel</i>                     |
|        |               | HET           | c.575T>A<br>p.Leu192His<br>-                    | S. c.                                                | 0.990<br>D<br>DC  | -<br>-                     | G<br>-<br>VUS                                                          |                              |                                | WT; HET                                          |                                       |                         | <i>Novel</i>                     |
| A3465  | <b>PROKR2</b> | HET           | c.759G>C<br>p.Lys253Asn<br>rs945720170          | D. r.                                                | 1.000<br>D<br>DC  | -<br>-                     | R<br>-<br>VUS                                                          | Index ind.<br>M              | 22                             | N/A; N/A                                         | L renal agenesis                      | -                       | <i>Novel</i>                     |
| B3235  | <b>PTPN11</b> | HET           | c.1048T>G<br>p.Ser350Ala<br>rs146571700         | D. r.                                                | 0.744<br>D<br>-   | 0/3/251460<br>0/1/6502     | G<br>US<br>VUS                                                         | Index ind.<br>F              | 11                             | WT; HET                                          | BL VUR                                | -                       | <i>Novel</i>                     |
| A3282  | <b>RAI1</b>   | HET           | c.1379C>T<br>p.Pro460Leu<br>rs749537955         | X. t.                                                | 0.998<br>D<br>DC  | 0/4/281476<br>-            | G<br>-<br>VUS                                                          | Index ind.<br>M              | 174                            | N/A; N/A                                         | R renal agenesis,<br>L renal stone    | -                       | <i>Novel</i>                     |
| B2677  | <b>RECQL4</b> | HOM           | c.1090G>A<br>p.Val364Met<br>rs144637135         | D. r. <sup>m</sup>                                   | 0.998<br>D<br>-   | 1/405/278948<br>0/1/12454  | G<br>B<br>LB                                                           | Index ind.<br>M              | 80                             | N/A; N/A                                         | L VUR                                 | -                       | <i>Novel</i>                     |
| A1069  | <b>SALL4</b>  | HET           | c.1243T>C<br>p.Cys415Arg<br>-                   | D. m.                                                | 1.000<br>D<br>-   | -<br>-                     | G<br>-<br>VUS                                                          | Index ind.<br>M              | 6                              | N/A; N/A                                         | L renal hypoplasia and<br>ureterocele | -                       | <i>Novel</i>                     |
| B3175  | <b>SOS1</b>   | HET           | c.2728G>C<br>p.Asp910His<br>rs369277679         | D. r.                                                | 0.906<br>T<br>DC  | 0/7/250834<br>0/2/6498     | G<br>US/LB<br>VUS                                                      | Index ind.<br>M              | 11                             | N/A; N/A                                         | BL VUR                                | -                       | <i>Novel</i>                     |
| B3366  | <b>SOX9</b>   | HET           | c.233G>A<br>p.Ser78Asn<br>rs1175328216          | C. i.                                                | 0.996<br>T<br>DC  | 0/1/226684<br>-            | R<br>-<br>LP                                                           | Index ind.<br>F              | 10                             | N/A; HET                                         | BL VUR                                | -                       | <i>Novel</i>                     |
|        |               |               |                                                 |                                                      |                   |                            |                                                                        | Father of<br>index ind.<br>M | 4                              | N/A; N/A;<br>affected<br>daughter:<br>HET        | BL VUR                                | -                       |                                  |
| B3744  | <b>TBX1</b>   | HET           | c.610G>A<br>p.Ala204Thr<br>rs748232668          | G. g.                                                | 0.337<br>D<br>DC  | 0/6/250736<br>-            | G<br>-<br>LB                                                           | Index ind.<br>M              | 15                             | HET; WT                                          | L hydroureter and<br>hydronephrosis   | -                       | <i>Novel</i>                     |
| B4063  | <b>TP63</b>   | HET           | c.865C>T<br>p.Pro289Ser<br>rs757045273          | C. i.                                                | 0.937<br>D<br>DC  | 0/10/251324<br>-           | G<br>-<br>B                                                            | Index ind.<br>F              | 14                             | HET; WT                                          | R UVJO                                | -                       | <i>Novel</i>                     |
| B2324  | <b>TP63</b>   | HET           | c.1313A>G<br>p.Gln438Arg<br>-                   | D. r.                                                | 0.996<br>D<br>DC  | -<br>-                     | G<br>-<br>VUS                                                          | Index ind.<br>M              | 10                             | WT; HET;<br>unaffected<br>sibling: WT            | BL hydronephrosis                     | -                       | <i>Novel</i>                     |

-, not available/not reported; **BL**, bilateral; **DC**, disease-causing; **D**, deleterious; **EVS**, Exome Variant Server; **F**, female; **gnomAD**, Genome Aggregation Database; **HOM**, homozygous; **HEMI**, hemizygous; **HET**, heterozygous; **ind**, individual; **L**, left; **M**, male; **MT**, MutationTaster; **N/A**, DNA for segregation analysis not available; **P**, polymorphism; **PMID**, PubMed Identifier; **PP2**, PolyPhen-2 **PUV**, posterior urethral valve; **R**, right; **SIFT**, Sorting intolerant from tolerant; **T**, tolerated; **UPJO**, uretero-pelvic junction obstruction; **UVJO**, uretero-vesical junction obstruction; **VUR**, vesicoureteral reflux; **WT**, wild type.

<sup>a</sup> Evolutionary amino acid conservation across phylogeny was assessed over *Mus musculus* (M. m.), *Gallus gallus* (G. g.), *Xenopus tropicalis* (X. t.), *Danio rerio* (D. r.), *Ciona intestinalis* (C. i.), *Caenorhabditis elegans* (C. e.), *Drosophila melanogaster* (D. m.), and *Saccharomyces cerevisiae* (S. c.). If continuous conservation is interrupted but otherwise preserved across phylogeny, additional information is provided.

<sup>b</sup> Allele frequencies in gnomAD and EVS are indicated with homozygous/hemizygous (if applicable)/heterozygous/total alleles detected.

<sup>c</sup> Indicates presence status in the Human Gene Mutation Database (HGMD®): **DM**, variant reported as disease-causing (reference for primary literature report is provided in 'Reference' column); **G**, the particular variant was not reported in the database but other disease-causing variants in the gene were previously reported; **R**, disease-causing variants were reported in the ±10 nucleotides vicinity of the nucleotide that harbors a variant here.

<sup>d</sup> ClinVar classification indicates that the variant has been reported to the ClinVar database as follows: **B**, benign; **LB**, likely benign; **US**, uncertain significance; **LP**, likely pathogenic; **PATH**, pathogenic.

<sup>e</sup> Indicates variant classification published by the American College of Medical Genetics and Genomics (ACMG) and the Association for Molecular Pathology (AMP): **B**, benign; **LB**, likely benign; **VUS**, variant of uncertain significance; **LP**, likely pathogenic; **P**, pathogenic.

<sup>f</sup> *Novel* indicates that, to our knowledge, the variant has not been reported in the literature before.

<sup>g</sup> Variant confirmation with Sanger sequencing was not performed due to insufficient remaining DNA.

<sup>h</sup> The orthologous gene in *X. t.* does not align at this position.

<sup>i</sup> Interruption of conservation due to aspartate present in *D. r.*

<sup>j</sup> Interruption of conservation due to glycine present in *M. m.*

<sup>k</sup> Interruption of conservation due to asparagine present in *M. m.*

<sup>l</sup> Interruption of conservation due to lysine present in *G. g.*

<sup>m</sup> The orthologous gene in *G. g.* does not align at this position.

**Table S8. Genotype and phenotype information for 10 families with likely causative variants in genes causing a phenocopy of CAKUT.**

Families are listed in alphabetical order by gene symbol.

| Family             | Gene         | Zygo-<br>sity    | Nucleotide<br>change<br>Protein change<br>dbSNP | Amino<br>acid<br>con-<br>serva-<br>tion <sup>a</sup> | PP2<br>SIFT<br>MT | gnomAD <sup>b</sup><br>EVS | HGMD <sup>c</sup><br>ClinVar <sup>d</sup><br>ACMG/<br>AMP <sup>e</sup> | Pedigree<br>relation<br>Sex      | Homo-<br>zygo-<br>sity<br>[Mb] | Segregation<br>maternal;<br>paternal;<br>(other) | Renal phenotype                                                                | Extrarenal<br>phenotype                                                                                       | Reference<br>[PMID] <sup>f</sup> |
|--------------------|--------------|------------------|-------------------------------------------------|------------------------------------------------------|-------------------|----------------------------|------------------------------------------------------------------------|----------------------------------|--------------------------------|--------------------------------------------------|--------------------------------------------------------------------------------|---------------------------------------------------------------------------------------------------------------|----------------------------------|
| B3618              | <b>BBS4</b>  | HOM              | c.157-2A>G<br>p.?<br>rs113994192                | -                                                    | -<br>-<br>-       | 0/1/251008<br>-            | DM<br>PATH<br>P                                                        | Index ind.<br>M                  | 231                            | N/A; N/A                                         | L renal agenesis, R<br>hydronephrosis,<br>cryptorchidism                       | Night blindness,<br>intellectual<br>disability, postaxial<br>polydactyly of foot,<br>obesity,<br>hypogonadism | 12016587<br><sup>234</sup>       |
| B780               | <b>BBS12</b> | HET              | c.1531C>T<br>p.Gln511*<br>-                     | -                                                    | -<br>-<br>-       | -<br>-                     | G<br>-<br>P                                                            | Index ind.<br>F                  | 2                              | HET; N/A                                         | BL cystic kidney<br>disease                                                    | Bardet-Biedl<br>syndrome<br>(OMIM: 615982)                                                                    | <i>Novel</i>                     |
|                    |              | HET              | c.2023C>T<br>p.Arg675*<br>rs752202089           | -                                                    | -<br>-<br>-       | 0/2/246292<br>-            | DM<br>PATH<br>P                                                        |                                  |                                | WT; N/A                                          |                                                                                |                                                                                                               | 20827784<br><sup>235</sup>       |
| B1255 <sup>9</sup> | <b>BICC1</b> | HET              | c.797A>G<br>p.Glu266Gly<br>-                    | C. i. <sup>h</sup>                                   | 0.890<br>D<br>DC  | -<br>-                     | G<br>-<br>LP                                                           | Index ind.<br>M                  | 14                             | HET; WT                                          | PUV, R hypoplastic<br>kidney, L dysplastic<br>kidney, BL<br>hydronephrosis     | -                                                                                                             | <i>Novel</i>                     |
| B2378              | <b>KIF14</b> | HOM              | c.1603T>G<br>p.Ser535Ala<br>rs868084071         | D. r. <sup>i</sup>                                   | 0.380<br>D<br>DC  | 0/2/245972<br>-            | G<br>-<br>VUS                                                          | Index ind.<br>M                  | 154                            | N/A; N/A;<br>affected<br>brother:<br>HOM         | R VUR, L UPJO,<br>R cystic dysplasia                                           | -                                                                                                             | <i>Novel</i>                     |
|                    |              |                  |                                                 |                                                      |                   |                            |                                                                        | Brother<br>of index<br>ind.<br>M | 154                            | N/A; N/A;<br>affected<br>brother:<br>HOM         | L hypoplastic<br>kidney, R renal<br>pelvis dilation                            | -                                                                                                             |                                  |
| B907               | <b>PKD1</b>  | HET <sup>j</sup> | c.6487C>T<br>p.Arg2163*<br>-                    | -                                                    | -<br>-<br>-       | -<br>-                     | DM<br>PATH<br>P                                                        | Index ind.<br>M                  | 12                             | N/A; N/A                                         | BL cystic kidneys<br>and VUR grade 5,<br>R duplex collecting<br>system         | -                                                                                                             | 11115377<br><sup>236</sup>       |
| B587               | <b>PKD1</b>  | HET <sup>j</sup> | c.303_305del<br>CAA<br>p.Asn101del<br>-         | -                                                    | -<br>-<br>-       | -<br>-                     | DM<br>-<br>VUS                                                         | Index ind.<br>M                  | 1                              | N/A; N/A                                         | L MCDK, R cystic<br>kidney with loss of<br>corticomedullary<br>differentiation | -                                                                                                             | 17574468<br><sup>237</sup>       |
| B3777              | <b>PKD1</b>  | HET              | c.11944C>T<br>p.Gln3982*<br>-                   | -                                                    | -<br>-<br>-       | -<br>-                     | DM<br>PATH<br>P                                                        | Index ind.<br>F                  | 5                              | WT; HET;<br>two<br>unaffected<br>siblings: WT    | BL polycystic<br>kidneys                                                       | -                                                                                                             | 17582161<br><sup>219</sup>       |
|                    |              |                  |                                                 |                                                      |                   |                            |                                                                        | Father of<br>index ind.<br>M     | 153                            | N/A; N/A;<br>affected<br>daughter:<br>HET        | BL polycystic<br>kidneys                                                       | -                                                                                                             |                                  |

| Family | Gene                     | Zygo-<br>sity    | Nucleotide<br>change<br>Protein change<br>dbSNP | Amino<br>acid<br>con-<br>serva-<br>tion <sup>a</sup> | PP2<br>SIFT<br>MT | gnomAD <sup>b</sup><br>EVS | HGMD <sup>c</sup><br>ClinVar <sup>d</sup><br>ACMG/<br>AMP <sup>e</sup> | Pedigree<br>relation<br>Sex  | Homo-<br>zygo-<br>sity<br>[Mb] | Segregation<br>maternal;<br>paternal;<br>(other) | Renal phenotype                                                    | Extrarenal<br>phenotype          | Reference<br>[PMID] <sup>f</sup> |
|--------|--------------------------|------------------|-------------------------------------------------|------------------------------------------------------|-------------------|----------------------------|------------------------------------------------------------------------|------------------------------|--------------------------------|--------------------------------------------------|--------------------------------------------------------------------|----------------------------------|----------------------------------|
| A4479  | <b>PKD2</b>              | HET <sup>g</sup> | c.916C>T<br>p.Arg306*<br>-                      | -                                                    | -<br>-<br>-       | 0/1/251172<br>-            | DM<br>PATH<br>P                                                        | Index ind.<br>F              | 19                             | WT; HET                                          | L MCDK, BL duplex<br>collecting system                             | -                                | 9326320<br><sup>238</sup>        |
|        |                          |                  |                                                 |                                                      |                   |                            |                                                                        | Father of<br>index ind.<br>M | 30                             | N/A; N/A;<br>affected son:<br>HET                | BL polycystic<br>kidneys                                           | -                                |                                  |
| B3906  | <b>PKHD1</b>             | HOM              | c.5601-1G>A<br>p.?<br>-                         | -                                                    | -<br>-<br>-       | -<br>-                     | R<br>-<br>P                                                            | Index ind.<br>M              | 154                            | HET; HET                                         | BL polycystic<br>kidneys                                           | Pulmonary<br>hypoplasia          | <i>Novel</i>                     |
| B4070  | <b>UMOD</b> <sub>k</sub> | HET              | c.306delC<br>p.Gly136Val<br>fs*141<br>-         | -                                                    | -<br>-<br>-       | -<br>-                     | DM<br>-<br>P                                                           | Index ind.<br>M              | 87                             | N/A; N/A                                         | PUV, BL<br>hydronephrosis and<br>echogenic,<br>multicystic kidneys | Pulmonary<br>hypoplasia, ascites | 28600779<br><sup>239</sup>       |

-, not available/not reported; **BL**, bilateral; **DC**, disease-causing; **D**, deleterious; **EVS**, Exome Variant Server; **F**, female; **gnomAD**, Genome Aggregation Database; **HOM**, homozygous; **HEMI**, hemizygous; **HET**, heterozygous; **ind**, individual; **L**, left; **M**, male; **MCDK**, multicystic dysplastic kidney; **MT**, MutationTaster; **N/A**, DNA for segregation analysis not available; **PMID**, PubMed Identifier; **PP2**, PolyPhen-2 **PUV**, posterior urethral valve; **R**, right; **SIFT**, Sorting intolerant from tolerant; **T**, tolerated; **UPJO**, uretero-pelvic junction obstruction; **UVJO**, uretero-vesical junction obstruction; **VUR**, vesicoureteral reflux; **WT**, wild type.

<sup>a</sup> Evolutionary amino acid conservation across phylogeny was assessed over *Mus musculus* (M. m.), *Gallus gallus* (G. g.), *Xenopus tropicalis* (X. t.), *Danio rerio* (D. r.), *Ciona intestinalis* (C. i.), *Caenorhabditis elegans* (C. e.), *Drosophila melanogaster* (D. m.), and *Saccharomyces cerevisiae* (S. c.). If continuous conservation is interrupted but otherwise preserved across phylogeny, additional information is provided.

<sup>b</sup> Allele frequencies in gnomAD and EVS are indicated with homozygous/hemizygous (if applicable)/heterozygous/total alleles detected.

<sup>c</sup> Indicates presence status in the Human Gene Mutation Database (HGMD®): **DM**, variant reported as disease-causing (reference for primary literature report is provided in 'Reference' column; **G**, the particular variant was not reported in the database but other disease-causing variants in the gene were previously reported; **R**, disease-causing variants were reported in the ±10 nucleotides vicinity of the nucleotide that harbors a variant here.

<sup>d</sup> ClinVar classification indicates that the variant has been reported to the ClinVar database as follows: **B**, benign; **LB**, likely benign; **US**, uncertain significance; **LP**, likely pathogenic; **PATH**, pathogenic.

<sup>e</sup> Indicates variant classification published by the American College of Medical Genetics and Genomics (ACMG) and the Association for Molecular Pathology (AMP): **B**, benign; **LB**, likely benign; **VUS**, variant of uncertain significance; **LP**, likely pathogenic; **P**, pathogenic.

<sup>f</sup> *Novel* indicates that, to our knowledge, the variant has not been reported in the literature before.

<sup>g</sup> In a clinical diagnostic setting, this variant would be classified as "variant of unknown significance" due to difficultly assessable pathogenicity (non-truncating heterozygous variant in a dominant gene with unproven *de novo* status and not previously reported in the literature).

<sup>h</sup> Interruption of conservation due to arginine present in *D. r.*

<sup>i</sup> Interruption of conservation due to threonine present in *G. g.*

<sup>j</sup> Variant confirmation with Sanger sequencing was not performed due to insufficient remaining DNA.

<sup>k</sup> The variant detected in *UMOD* can explain the bilateral echogenic kidneys in the patient; however, the CAKUT phenotype besides that (PUV, VUR) is most likely due to another cause.

## REFERENCES

1. Sherry ST, Ward M, Sirotkin K. dbSNP-database for single nucleotide polymorphisms and other classes of minor genetic variation. *Genome Res.* 1999;9(8):677-679.
2. Genomes Project C, Auton A, Brooks LD, et al. A global reference for human genetic variation. *Nature.* 2015;526(7571):68-74.
3. Braun DA, Sadowski CE, Kohl S, et al. Mutations in nuclear pore genes NUP93, NUP205 and XPO5 cause steroid-resistant nephrotic syndrome. *Nat Genet.* 2016;48(4):457-465.
4. van der Ven AT, Connaughton DM, Ityel H, et al. Whole-Exome Sequencing Identifies Causative Mutations in Families with Congenital Anomalies of the Kidney and Urinary Tract. *J Am Soc Nephrol.* 2018;29(9):2348-2361.
5. Hildebrandt F, Heeringa SF, Ruschendorf F, et al. A systematic approach to mapping recessive disease genes in individuals from outbred populations. *PLoS Genet.* 2009;5(1):e1000353.
6. Sim NL, Kumar P, Hu J, Henikoff S, Schneider G, Ng PC. SIFT web server: predicting effects of amino acid substitutions on proteins. *Nucleic Acids Res.* 2012;40(Web Server issue):W452-457.
7. Schwarz JM, Rodelsperger C, Schuelke M, Seelow D. MutationTaster evaluates disease-causing potential of sequence alterations. *Nat Methods.* 2010;7(8):575-576.
8. Adzhubei IA, Schmidt S, Peshkin L, et al. A method and server for predicting damaging missense mutations. *Nat Methods.* 2010;7(4):248-249.
9. Karczewski KJ, Francioli LC, Tiao G, et al. The mutational constraint spectrum quantified from variation in 141,456 humans. *Nature.* 2020;581(7809):434-443.
10. Stenson PD, Mort M, Ball EV, et al. The Human Gene Mutation Database (HGMD((R))): optimizing its use in a clinical diagnostic or research setting. *Hum Genet.* 2020;139(10):1197-1207.
11. Landrum MJ, Chitipiralla S, Brown GR, et al. ClinVar: improvements to accessing data. *Nucleic Acids Res.* 2020;48(D1):D835-D844.
12. Yates AD, Achuthan P, Akanni W, et al. Ensembl 2020. *Nucleic Acids Res.* 2020;48(D1):D682-D688.
13. Sievers F, Wilm A, Dineen D, et al. Fast, scalable generation of high-quality protein multiple sequence alignments using Clustal Omega. *Mol Syst Biol.* 2011;7:539.
14. Richards S, Aziz N, Bale S, et al. Standards and guidelines for the interpretation of sequence variants: a joint consensus recommendation of the American College of Medical Genetics and Genomics and the Association for Molecular Pathology. *Genet Med.* 2015;17(5):405-424.
15. Kopanos C, Tsiolkas V, Kouris A, et al. VarSome: the human genomic variant search engine. *Bioinformatics.* 2019;35(11):1978-1980.
16. Gribouval O, Gonzales M, Neuhaus T, et al. Mutations in genes in the renin-angiotensin system are associated with autosomal recessive renal tubular dysgenesis. *Nat Genet.* 2005;37(9):964-968.
17. Barak H, Huh SH, Chen S, et al. FGF9 and FGF20 maintain the stemness of nephron progenitors in mice and man. *Dev Cell.* 2012;22(6):1191-1207.
18. Humbert C, Silbermann F, Morar B, et al. Integrin alpha 8 recessive mutations are responsible for bilateral renal agenesis in humans. *Am J Hum Genet.* 2014;94(2):288-294.
19. Stuart HM, Roberts NA, Burgu B, et al. LRIG2 mutations cause urofacial syndrome. *Am J Hum Genet.* 2013;92(2):259-264.
20. Saisawat P, Kohl S, Hilger AC, et al. Whole-exome resequencing reveals recessive mutations in TRAP1 in individuals with CAKUT and VACTERL association. *Kidney Int.* 2014;85(6):1310-1317.
21. Kolvenbach CM, Dworschak GC, Frese S, et al. Rare Variants in BNC2 Are Implicated in Autosomal-Dominant Congenital Lower Urinary-Tract Obstruction. *Am J Hum Genet.* 2019;104(5):994-1006.
22. Lopez-Rivera E, Liu YP, Verbitsky M, et al. Genetic Drivers of Kidney Defects in the DiGeorge Syndrome. *N Engl J Med.* 2017;376(8):742-754.
23. Sanna-Cherchi S, Sampogna RV, Papeta N, et al. Mutations in DSTYK and dominant urinary tract malformations. *N Engl J Med.* 2013;369(7):621-629.
24. Brophy PD, Rasmussen M, Parida M, et al. A Gene Implicated in Activation of Retinoic Acid Receptor Targets Is a Novel Renal Agenesis Gene in Humans. *Genetics.* 2017;207(1):215-228.
25. Kirby A, Gnirke A, Jaffe DB, et al. Mutations causing medullary cystic kidney disease type 1 lie in a large VNTR in MUC1 missed by massively parallel sequencing. *Nat Genet.* 2013;45(3):299-303.



26. Houweling AC, Beaman GM, Postma AV, et al. Loss-of-function variants in myocardin cause congenital megabladder in humans and mice. *J Clin Invest*. 2019;129(12):5374-5380.
27. Vivante A, Mann N, Yonath H, et al. A Dominant Mutation in Nuclear Receptor Interacting Protein 1 Causes Urinary Tract Malformations via Dysregulation of Retinoic Acid Signaling. *J Am Soc Nephrol*. 2017;28(8):2364-2376.
28. Hwang DY, Kohl S, Fan X, et al. Mutations of the SLIT2-ROBO2 pathway genes SLIT2 and SRGAP1 confer risk for congenital anomalies of the kidney and urinary tract. *Hum Genet*. 2015;134(8):905-916.
29. Lu W, van Eerde AM, Fan X, et al. Disruption of ROBO2 is associated with urinary tract anomalies and confers risk of vesicoureteral reflux. *Am J Hum Genet*. 2007;80(4):616-632.
30. Weber S, Taylor JC, Winyard P, et al. SIX2 and BMP4 mutations associate with anomalous kidney development. *J Am Soc Nephrol*. 2008;19(5):891-903.
31. Gimelli S, Caridi G, Beri S, et al. Mutations in SOX17 are associated with congenital anomalies of the kidney and the urinary tract. *Hum Mutat*. 2010;31(12):1352-1359.
32. Vivante A, Kleppa MJ, Schulz J, et al. Mutations in TBX18 Cause Dominant Urinary Tract Malformations via Transcriptional Dysregulation of Ureter Development. *Am J Hum Genet*. 2015;97(2):291-301.
33. Gbadegesin RA, Brophy PD, Adeyemo A, et al. TNXB mutations can cause vesicoureteral reflux. *J Am Soc Nephrol*. 2013;24(8):1313-1322.
34. Jenkins D, Bitner-Glindzicz M, Malcolm S, et al. De novo Uroplakin IIIa heterozygous mutations cause human renal adysplasia leading to severe kidney failure. *J Am Soc Nephrol*. 2005;16(7):2141-2149.
35. Kohl S, Hwang DY, Dworschak GC, et al. Mild recessive mutations in six Fraser syndrome-related genes cause isolated congenital anomalies of the kidney and urinary tract. *J Am Soc Nephrol*. 2014;25(9):1917-1922.
36. van Haelst MM, Scambler PJ, Hennekam RC. Fraser syndrome: a clinical study of 59 cases and evaluation of diagnostic criteria. *Am J Med Genet A*. 2007;143a(24):3194-3203.
37. Bulum B, Ozcakar ZB, Duman D, et al. HPSE2 mutations in urofacial syndrome, non-neurogenic neurogenic bladder and lower urinary tract dysfunction. *Nephron*. 2015;130(1):54-58.
38. Abdelhak S, Kalatzis V, Heilig R, et al. Clustering of mutations responsible for branchio-oto-renal (BOR) syndrome in the eyes absent homologous region (eyaHR) of EYA1. *Hum Mol Genet*. 1997;6(13):2247-2255.
39. Pandolfi PP, Roth ME, Karis A, et al. Targeted disruption of the GATA3 gene causes severe abnormalities in the nervous system and in fetal liver haematopoiesis. *Nat Genet*. 1995;11(1):40-44.
40. Van Esch H, Groenen P, Nesbit MA, et al. GATA3 haplo-insufficiency causes human HDR syndrome. *Nature*. 2000;406(6794):419-422.
41. Lindner TH, Njolstad PR, Horikawa Y, Bostad L, Bell GI, Sovik O. A novel syndrome of diabetes mellitus, renal dysfunction and genital malformation associated with a partial deletion of the pseudo-POU domain of hepatocyte nuclear factor-1beta. *Hum Mol Genet*. 1999;8(11):2001-2008.
42. Sanyanusin P, McNoe LA, Sullivan MJ, Weaver RG, Eccles MR. Mutation of PAX2 in two siblings with renal-coloboma syndrome. *Hum Mol Genet*. 1995;4(11):2183-2184.
43. Heidet L, Moriniere V, Henry C, et al. Targeted Exome Sequencing Identifies PBX1 as Involved in Monogenic Congenital Anomalies of the Kidney and Urinary Tract. *J Am Soc Nephrol*. 2017;28(10):2901-2914.
44. Kohlhase J, Wischermann A, Reichenbach H, Froster U, Engel W. Mutations in the SALL1 putative transcription factor gene cause Townes-Brocks syndrome. *Nat Genet*. 1998;18(1):81-83.
45. Ruf RG, Xu PX, Silvius D, et al. SIX1 mutations cause branchio-oto-renal syndrome by disruption of EYA1-SIX1-DNA complexes. *Proc Natl Acad Sci U S A*. 2004;101(21):8090-8095.
46. Hoskins BE, Cramer CH, Silvius D, et al. Transcription factor SIX5 is mutated in patients with branchio-oto-renal syndrome. *Am J Hum Genet*. 2007;80(4):800-804.
47. Biason-Lauber A, Konrad D, Navratil F, Schoenle EJ. A WNT4 mutation associated with Mullerian-duct regression and virilization in a 46,XX woman. *N Engl J Med*. 2004;351(8):792-798.
48. Mandel H, Shemer R, Borochowitz ZU, et al. SERKAL syndrome: an autosomal-recessive disorder caused by a loss-of-function mutation in WNT4. *Am J Hum Genet*. 2008;82(1):39-47.
49. Vivante A, Mark-Danieli M, Davidovits M, et al. Renal hypodysplasia associates with a WNT4 variant that causes aberrant canonical WNT signaling. *J Am Soc Nephrol*. 2013;24(4):550-558.

50. Connaughton DM, Dai R, Owen DJ, et al. Mutations of the Transcriptional Corepressor ZMYM2 Cause Syndromic Urinary Tract Malformations. *Am J Hum Genet.* 2020;107(4):727-742.
51. Green AJ, Sandford RN, Davison BC. An autosomal dominant syndrome of renal and anogenital malformations with syndactyly. *J Med Genet.* 1996;33(7):594-596.
52. Unger S, Bohm D, Kaiser FJ, et al. Mutations in the cyclin family member FAM58A cause an X-linked dominant disorder characterized by syndactyly, telecanthus and anogenital and renal malformations. *Nat Genet.* 2008;40(3):287-289.
53. Lesnik Oberstein SA, Kriek M, White SJ, et al. Peters Plus syndrome is caused by mutations in B3GALTL, a putative glycosyltransferase. *Am J Hum Genet.* 2006;79(3):562-566.
54. Greenbaum L, Gilboa Y, Raas-Rothschild A, et al. Diaphanospondylodysostosis: Refining the prenatal diagnosis of a rare skeletal disorder. *Eur J Med Genet.* 2019;62(3):167-171.
55. Haghghi A, Kavehmanesh Z, Haghghi A, et al. Congenital generalized lipodystrophy: identification of novel variants and expansion of clinical spectrum. *Clin Genet.* 2016;89(4):434-441.
56. Van Balkom ID, Alders M, Allanson J, et al. Lymphedema-lymphangiectasia-mental retardation (Hennekam) syndrome: a review. *Am J Med Genet.* 2002;112(4):412-421.
57. Karamatic Crew V, Burton N, Kagan A, et al. CD151, the first member of the tetraspanin (TM4) superfamily detected on erythrocytes, is essential for the correct assembly of human basement membranes in kidney and skin. *Blood.* 2004;104(8):2217-2223.
58. Filges I, Bruder E, Brandal K, et al. Stromme Syndrome Is a Ciliary Disorder Caused by Mutations in CENPF. *Hum Mutat.* 2016;37(4):359-363.
59. Frosk P, Arts HH, Philippe J, et al. A truncating mutation in CEP55 is the likely cause of MARCH, a novel syndrome affecting neuronal mitosis. *J Med Genet.* 2017;54(7):490-501.
60. Weber S, Thiele H, Mir S, et al. Muscarinic Acetylcholine Receptor M3 Mutation Causes Urinary Bladder Disease and a Prune-Belly-like Syndrome. *Am J Hum Genet.* 2011;89(5):668-674.
61. Vogt J, Morgan NV, Rehal P, et al. CHRNG genotype-phenotype correlations in the multiple pterygium syndromes. *J Med Genet.* 2012;49(1):21-26.
62. Amr S, Heisey C, Zhang M, et al. A homozygous mutation in a novel zinc-finger protein, ERIS, is responsible for Wolfram syndrome 2. *Am J Hum Genet.* 2007;81(4):673-683.
63. Caglayan AO, Baranoski JF, Aktar F, et al. Brain malformations associated with Knobloch syndrome-review of literature, expanding clinical spectrum, and identification of novel mutations. *Pediatr Neurol.* 2014;51(6):806-813 e808.
64. Shaheen R, Al-Salam Z, El-Hattab AW, Alkuraya FS. The syndrome dysmorphic facies, renal agenesis, ambiguous genitalia, microcephaly, polydactyly and lissencephaly (DREAM-PL): Report of two additional patients. *Am J Med Genet A.* 2016;170(12):3222-3226.
65. Loffler J, Trojovský A, Casati B, Kroisel PM, Utermann G. Homozygosity for the W151X stop mutation in the delta7-sterol reductase gene (DHCR7) causing a lethal form of Smith-Lemli-Opitz syndrome: retrospective molecular diagnosis. *Am J Med Genet.* 2000;95(2):174-177.
66. Astuti D, Morris MR, Cooper WN, et al. Germline mutations in DIS3L2 cause the Perlman syndrome of overgrowth and Wilms tumor susceptibility. *Nat Genet.* 2012;44(3):277-284.
67. Baujat G, Huber C, El Hokayem J, et al. Asphyxiating thoracic dysplasia: clinical and molecular review of 39 families. *J Med Genet.* 2013;50(2):91-98.
68. Armistead J, Khatkar S, Meyer B, et al. Mutation of a gene essential for ribosome biogenesis, EMG1, causes Bowen-Conradi syndrome. *Am J Hum Genet.* 2009;84(6):728-739.
69. Bertola DR, Pereira AC, de Oliveira PS, Kim CA, Krieger JE. Clinical variability in a Noonan syndrome family with a new PTPN11 gene mutation. *Am J Med Genet A.* 2004;130A(4):378-383.
70. Vega H, Trainer AH, Gordillo M, et al. Phenotypic variability in 49 cases of ESCO2 mutations, including novel missense and codon deletion in the acetyltransferase domain, correlates with ESCO2 expression and establishes the clinical criteria for Roberts syndrome. *J Med Genet.* 2010;47(1):30-37.
71. Lehnert W, Wendel U, Lindenmaier S, Bohm N. Multiple acyl-CoA dehydrogenation deficiency (glutaric aciduria type II), congenital polycystic kidneys, and symmetric warty dysplasia of the cerebral cortex in two brothers. I. Clinical, metabolic, and biochemical findings. *Eur J Pediatr.* 1982;139(1):56-59.
72. Joenje H, Patel KJ. The emerging genetic and molecular basis of Fanconi anaemia. *Nat Rev Genet.* 2001;2(6):446-457.

73. Kalb R, Neveling K, Hoehn H, et al. Hypomorphic mutations in the gene encoding a key Fanconi anemia protein, FANCD2, sustain a significant group of FA-D2 patients with severe phenotype. *Am J Hum Genet.* 2007;80(5):895-910.
74. Wegner RD, Henrichs I, Joenje H, Schroeder-Kurth T. Fanconi anemia complementation group E: clinical and cytogenetic data of the first patient. *Clin Genet.* 1996;50(6):479-482.
75. Savage SA, Ballew BJ, Giri N, et al. Novel FANCI mutations in Fanconi anemia with VACTERL association. *Am J Med Genet A.* 2016;170A(2):386-391.
76. Vetro A, Iacone M, Limongelli I, et al. Loss-of-Function FANCL Mutations Associate with Severe Fanconi Anemia Overlapping the VACTERL Association. *Hum Mutat.* 2015;36(5):562-568.
77. Alders M, Al-Gazali L, Cordeiro I, et al. Hennekam syndrome can be caused by FAT4 mutations and be allelic to Van Maldergem syndrome. *Hum Genet.* 2014;133(9):1161-1167.
78. Thauvin-Robinet C, Duplomb-Jego L, Limoge F, et al. Homozygous FIBP nonsense variant responsible of syndromic overgrowth, with overgrowth, macrocephaly, retinal coloboma and learning disabilities. *Clin Genet.* 2016;89(5):e1-4.
79. Shi H, Enriquez A, Rapadas M, et al. NAD Deficiency, Congenital Malformations, and Niacin Supplementation. *N Engl J Med.* 2017;377(6):544-552.
80. Paetau A, Honkala H, Salonen R, Ignatius J, Kestila M, Herva R. Hydrolethalus syndrome: neuropathology of 21 cases confirmed by HYL51 gene mutation analysis. *J Neuropathol Exp Neurol.* 2008;67(8):750-762.
81. Lahiry P, Wang J, Robinson JF, et al. A multiplex human syndrome implicates a key role for intestinal cell kinase in development of central nervous, skeletal, and endocrine systems. *Am J Hum Genet.* 2009;84(2):134-147.
82. Yalcin EG, He Y, Orhan D, Pazzagli C, Emiralioglu N, Has C. Crucial role of posttranslational modifications of integrin alpha3 in interstitial lung disease and nephrotic syndrome. *Hum Mol Genet.* 2015;24(13):3679-3688.
83. Mochida GH, Ganesh VS, Felie JM, et al. A homozygous mutation in the tight-junction protein JAM3 causes hemorrhagic destruction of the brain, subependymal calcification, and congenital cataracts. *Am J Hum Genet.* 2010;87(6):882-889.
84. Klupa T, Szopa M, Skupien J, et al. LMNA gene mutation search in Polish patients: new features of the heterozygous Arg482Gln mutation phenotype. *Endocrine.* 2009;36(3):518-523.
85. Kantarci S, Al-Gazali L, Hill RS, et al. Mutations in LRP2, which encodes the multiligand receptor megalin, cause Donnai-Barrow and facio-oculo-acoustico-renal syndromes. *Nat Genet.* 2007;39(8):957-959.
86. Li Y, Pawlik B, Elcioglu N, et al. LRP4 mutations alter Wnt/beta-catenin signaling and cause limb and kidney malformations in Cenani-Lenz syndrome. *Am J Hum Genet.* 2010;86(5):696-706.
87. Szot JO, Campagnolo C, Cao Y, et al. Bi-allelic Mutations in NADSYN1 Cause Multiple Organ Defects and Expand the Genotypic Spectrum of Congenital NAD Deficiency Disorders. *Am J Hum Genet.* 2020;106(1):129-136.
88. Khan TN, Khan K, Sadeghpour A, et al. Mutations in NCAPG2 Cause a Severe Neurodevelopmental Syndrome that Expands the Phenotypic Spectrum of Condensinopathies. *Am J Hum Genet.* 2019;104(1):94-111.
89. Crane DI, Maxwell MA, Paton BC. PEX1 mutations in the Zellweger spectrum of the peroxisome biogenesis disorders. *Hum Mutat.* 2005;26(3):167-175.
90. Sundaram SS, Bove KE, Lovell MA, Sokol RJ. Mechanisms of disease: Inborn errors of bile acid synthesis. *Nat Clin Pract Gastroenterol Hepatol.* 2008;5(8):456-468.
91. Schnur RE, Greenbaum BH, Heymann WR, Christensen K, Buck AS, Reid CS. Acute lymphoblastic leukemia in a child with the CHIME neuroectodermal dysplasia syndrome. *Am J Med Genet.* 1997;72(1):24-29.
92. Ohba C, Okamoto N, Murakami Y, et al. PIGN mutations cause congenital anomalies, developmental delay, hypotonia, epilepsy, and progressive cerebellar atrophy. *Neurogenetics.* 2014;15(2):85-92.
93. Krawitz PM, Murakami Y, Hecht J, et al. Mutations in PIGO, a member of the GPI-anchor-synthesis pathway, cause hyperphosphatasia with mental retardation. *Am J Hum Genet.* 2012;91(1):146-151.
94. Nakashima M, Kashii H, Murakami Y, et al. Novel compound heterozygous PIGT mutations caused multiple congenital anomalies-hypotonia-seizures syndrome 3. *Neurogenetics.* 2014;15(3):193-200.

95. Horn D, Wieczorek D, Metcalfe K, et al. Delineation of PIGV mutation spectrum and associated phenotypes in hyperphosphatasia with mental retardation syndrome. *Eur J Hum Genet.* 2014;22(6):762-767.
96. Ilkovski B, Pagnamenta AT, O'Grady GL, et al. Mutations in PIGY: expanding the phenotype of inherited glycosylphosphatidylinositol deficiencies. *Hum Mol Genet.* 2015;24(21):6146-6159.
97. Horslen SP, Clayton PT, Harding BN, Hall NA, Keir G, Winchester B. Olivopontocerebellar atrophy of neonatal onset and disialotransferrin developmental deficiency syndrome. *Arch Dis Child.* 1991;66(9):1027-1032.
98. Shaheen R, Faqeih E, Shamseldin HE, et al. POC1A truncation mutation causes a ciliopathy in humans characterized by primordial dwarfism. *Am J Hum Genet.* 2012;91(2):330-336.
99. Alessandri JL, Dagoneau N, Laville JM, Baruteau J, Hebert JC, Cormier-Daire V. RAB23 mutation in a large family from Comoros Islands with Carpenter syndrome. *Am J Med Genet A.* 2010;152A(4):982-986.
100. Skorka A, Bielicka-Cymermann J, Gieruszczak-Bialek D, Korniszewski L. Thrombocytopenia-absent radius (tar) syndrome: a case with agenesis of corpus callosum, hypoplasia of cerebellar vermis and horseshoe kidney. *Genet Couns.* 2005;16(4):377-382.
101. Siitonen HA, Sotkasiira J, Biervliet M, et al. The mutation spectrum in RECQL4 diseases. *Eur J Hum Genet.* 2009;17(2):151-158.
102. Wiens L, Strickland DK, Sniffen B, Warady BA. Robinow syndrome: report of two patients with cystic kidney disease. *Clin Genet.* 1990;37(6):481-484.
103. Golzio C, Martinovic-Bouriel J, Thomas S, et al. Matthew-Wood syndrome is caused by truncating mutations in the retinol-binding protein receptor gene STRA6. *Am J Hum Genet.* 2007;80(6):1179-1187.
104. Xin B, Puffenberger EG, Turben S, Tan H, Zhou A, Wang H. Homozygous frameshift mutation in TMCO1 causes a syndrome with craniofacial dysmorphism, skeletal anomalies, and mental retardation. *Proc Natl Acad Sci U S A.* 2010;107(1):258-263.
105. Vanlieferinghen P, Gallot D, Francannet C, Meyer F, Dechelotte P. Prenatal ultrasonographic diagnosis of a recurrent case of Johanson-Blizzard syndrome. *Genet Couns.* 2003;14(1):105-107.
106. Salih MA, Tuvemo T. Diabetes insipidus, diabetes mellitus, optic atrophy and deafness (DIDMOAD syndrome). A clinical study in two Sudanese families. *Acta Paediatr Scand.* 1991;80(5):567-572.
107. Niemann S, Zhao C, Pascu F, et al. Homozygous WNT3 mutation causes tetra-amelia in a large consanguineous family. *Am J Hum Genet.* 2004;74(3):558-563.
108. Chen M, Kuo HH, Huang YC, et al. A case of restrictive dermopathy with complete chorioamniotic membrane separation caused by a novel homozygous nonsense mutation in the ZMPSTE24 gene. *Am J Med Genet A.* 2009;149A(7):1550-1554.
109. Riviere JB, van Bon BW, Hoischen A, et al. De novo mutations in the actin genes ACTB and ACTG1 cause Baraitser-Winter syndrome. *Nat Genet.* 2012;44(4):440-444, S441-442.
110. Thorson W, Diaz-Horta O, Foster J, 2nd, et al. De novo ACTG2 mutations cause congenital distended bladder, microcolon, and intestinal hypoperistalsis. *Hum Genet.* 2014;133(6):737-742.
111. Levy P, Baraitser M. Coffin-Siris syndrome. *J Med Genet.* 1991;28(5):338-341 (Text).
112. Kaname T, Yanagi K, Chinen Y, et al. Mutations in CD96, a member of the immunoglobulin superfamily, cause a form of the C (Opitz trigonocephaly) syndrome. *Am J Hum Genet.* 2007;81(4):835-841.
113. Mussa A, Peruzzi L, Chiesa N, et al. Nephrological findings and genotype-phenotype correlation in Beckwith-Wiedemann syndrome. *Pediatr Nephrol.* 2012;27(3):397-406.
114. Janssen N, Bergman JE, Swertz MA, et al. Mutation update on the CHD7 gene involved in CHARGE syndrome. *Hum Mutat.* 2012;33(8):1149-1160.
115. Kanjilal D, Basir MA, Verma RS, Rajegowda BK, Lala R, Nagaraj A. New dysmorphic features in Rubinstein-Taybi syndrome. *J Med Genet.* 1992;29(9):669-670.
116. Webb BD, Metikala S, Wheeler PG, et al. Heterozygous Pathogenic Variant in DACT1 Causes an Autosomal-Dominant Syndrome with Features Overlapping Townes-Brocks Syndrome. *Hum Mutat.* 2017;38(4):373-377.
117. Roelfsema JH, White SJ, Ariyurek Y, et al. Genetic heterogeneity in Rubinstein-Taybi syndrome: mutations in both the CBP and EP300 genes cause disease. *Am J Hum Genet.* 2005;76(4):572-580.
118. Tokhmafshan F, Brophy PD, Gbadegesin RA, Gupta IR. Vesicoureteral reflux and the extracellular matrix connection. *Pediatr Nephrol.* 2017;32(4):565-576.

119. Milunsky JM, Zhao G, Maher TA, Colby R, Everman DB. LADD syndrome is caused by FGF10 mutations. *Clin Genet.* 2006;69(4):349-354.
120. Bamforth JS, Kaurah P. Lacrimo-auriculo-dento-digital syndrome: evidence for lower limb involvement and severe congenital renal anomalies. *Am J Med Genet.* 1992;43(6):932-937.
121. Falardeau J, Chung WC, Beenken A, et al. Decreased FGF8 signaling causes deficiency of gonadotropin-releasing hormone in humans and mice. *J Clin Invest.* 2008;118(8):2822-2831.
122. Farrow EG, Davis SI, Mooney SD, et al. Extended mutational analyses of FGFR1 in osteoglyphonic dysplasia. *Am J Med Genet A.* 2006;140(5):537-539.
123. LeHeup BP, Masutti JP, Droulle P, Tisserand J. The Antley-Bixler syndrome: report of two familial cases with severe renal and anal anomalies. *Eur J Pediatr.* 1995;154(2):130-133.
124. Rohmann E, Brunner HG, Kayserili H, et al. Mutations in different components of FGF signaling in LADD syndrome. *Nat Genet.* 2006;38(4):414-417.
125. Hilger AC, Halbritter J, Pennimpede T, et al. Targeted Resequencing of 29 Candidate Genes and Mouse Expression Studies Implicate ZIC3 and FOXF1 in Human VATER/VACTERL Association. *Hum Mutat.* 2015;36(12):1150-1154 (Text).
126. Bekheirnia MR, Bekheirnia N, Bainbridge MN, et al. Whole-exome sequencing in the molecular diagnosis of individuals with congenital anomalies of the kidney and urinary tract and identification of a new causative gene. *Genet Med.* 2017;19(4):412-420.
127. Tassabehji M, Fang ZM, Hilton EN, et al. Mutations in GDF6 are associated with vertebral segmentation defects in Klippel-Feil syndrome. *Hum Mutat.* 2008;29(8):1017-1027.
128. Chatterjee R, Ramos E, Hoffman M, et al. Traditional and targeted exome sequencing reveals common, rare and novel functional deleterious variants in RET-signaling complex in a cohort of living US patients with urinary tract malformations. *Hum Genet.* 2012;131(11):1725-1738.
129. Carmichael SL, Ma C, Choudhry S, Lammer EJ, Witte JS, Shaw GM. Hypospadias and genes related to genital tubercle and early urethral development. *J Urol.* 2013;190(5):1884-1892.
130. Cain JE, Islam E, Haxho F, et al. GLI3 repressor controls nephron number via regulation of Wnt11 and Ret in ureteric tip cells. *PLoS One.* 2009;4(10):e7313.
131. Halal F. The hand-foot-genital (hand-foot-uterus) syndrome: family report and update. *Am J Med Genet.* 1988;30(3):793-803.
132. Kamath BM, Spinner NB, Rosenblum ND. Renal involvement and the role of Notch signalling in Alagille syndrome. *Nat Rev Nephrol.* 2013;9(7):409-418.
133. Campeau PM, Kim JC, Lu JT, et al. Mutations in KAT6B, encoding a histone acetyltransferase, cause Genitopatellar syndrome. *Am J Hum Genet.* 2012;90(2):282-289.
134. Chiesa N, De Crescenzo A, Mishra K, et al. The KCNQ1OT1 imprinting control region and non-coding RNA: new properties derived from the study of Beckwith-Wiedemann syndrome and Silver-Russell syndrome cases. *Hum Mol Genet.* 2012;21(1):10-25.
135. Marneros AG, Beck AE, Turner EH, et al. Mutations in KCTD1 cause scalp-ear-nipple syndrome. *Am J Hum Genet.* 2013;92(4):621-626.
136. Schubert S, Zenker M, Rowe SL, et al. Germline KRAS mutations cause Noonan syndrome. *Nat Genet.* 2006;38(3):331-336.
137. Banka S, Veeramachaneni R, Reardon W, et al. How genetically heterogeneous is Kabuki syndrome?: MLL2 testing in 116 patients, review and analyses of mutation and phenotypic spectrum. *Eur J Hum Genet.* 2012;20(4):381-388.
138. Hagan DM, Ross AJ, Strachan T, et al. Mutation analysis and embryonic expression of the HLXB9 Currarino syndrome gene. *Am J Hum Genet.* 2000;66(5):1504-1515.
139. Moosa S, Bohrer-Rabel H, Altmuller J, et al. Smith-Kingsmore syndrome: A third family with the MTOR mutation c.5395G>A p.(Glu1799Lys) and evidence for paternal gonadal mosaicism. *Am J Med Genet A.* 2017;173(1):264-267.
140. Marcelis CL, Hol FA, Graham GE, et al. Genotype-phenotype correlations in MYCN-related Feingold syndrome. *Hum Mutat.* 2008;29(9):1125-1132.
141. Malan V, Rajan D, Thomas S, et al. Distinct effects of allelic NFIX mutations on nonsense-mediated mRNA decay engender either a Sotos-like or a Marshall-Smith syndrome. *Am J Hum Genet.* 2010;87(2):189-198.
142. Rohatgi S, Clark D, Kline AD, et al. Facial diagnosis of mild and variant CdLS: Insights from a dysmorphologist survey. *Am J Med Genet A.* 2010;152A(7):1641-1653.

143. Meeus L, Gilbert B, Rydlewski C, et al. Characterization of a novel loss of function mutation of PAX8 in a familial case of congenital hypothyroidism with in-place, normal-sized thyroid. *J Clin Endocrinol Metab.* 2004;89(9):4285-4291.
144. Madan S, Liu W, Lu JT, et al. A non-mosaic PORCN mutation in a male with severe congenital anomalies overlapping focal dermal hypoplasia. In: *Mol Genet Metab Rep.* Vol 12.2017:57-61.
145. Sarfati J, Dode C, Young J. Kallmann syndrome caused by mutations in the PROK2 and PROKR2 genes: pathophysiology and genotype-phenotype correlations. *Front Horm Res.* 2010;39:121-132.
146. Reardon W, Zhou XP, Eng C. A novel germline mutation of the PTEN gene in a patient with macrocephaly, ventricular dilatation, and features of VATER association. *J Med Genet.* 2001;38(12):820-823.
147. Razzaque MA, Nishizawa T, Komoike Y, et al. Germline gain-of-function mutations in RAF1 cause Noonan syndrome. *Nat Genet.* 2007;39(8):1013-1017.
148. Vilboux T, Ciccone C, Blancato JK, et al. Molecular analysis of the Retinoic Acid Induced 1 gene (RAI1) in patients with suspected Smith-Magenis syndrome without the 17p11.2 deletion. *PLoS One.* 2011;6(8):e22861.
149. Kohlhase J. SALL4-Related Disorders. In: Adam MP, Ardinger HH, Pagon RA, et al., editors. *GeneReviews((R))*. Seattle (WA): University of Washington, Seattle; University of Washington, Seattle. GeneReviews is a registered trademark of the University of Washington, Seattle. All rights reserved.; 1993.
150. Lalani SR, Safiullah AM, Molinari LM, Fernbach SD, Martin DM, Belmont JW. SEMA3E mutation in a patient with CHARGE syndrome. *J Med Genet.* 2004;41(7):e94.
151. Schinzel A, Giedion A. A syndrome of severe midface retraction, multiple skull anomalies, clubfeet, and cardiac and renal malformations in sibs. *Am J Med Genet.* 1978;1(4):361-375.
152. Bernier FP, Caluseriu O, Ng S, et al. Haploinsufficiency of SF3B4, a component of the pre-mRNA spliceosomal complex, causes Nager syndrome. *Am J Hum Genet.* 2012;90(5):925-933.
153. Lurie IW, Ilyina HG, Podleschuk LV, Gorelik LB, Zaletajev DV. Chromosome 7 abnormalities in parents of children with holoprosencephaly and hydronephrosis. *Am J Med Genet.* 1990;35(2):286-288.
154. Tooley M, Lynch D, Bernier F, et al. Cerebro-costo-mandibular syndrome: Clinical, radiological, and genetic findings. *Am J Med Genet A.* 2016;170A(5):1115-1126.
155. Ferrero GB, Baldassarre G, Delmonaco AG, et al. Clinical and molecular characterization of 40 patients with Noonan syndrome. *Eur J Med Genet.* 2008;51(6):566-572.
156. Airik R, Trowe MO, Foik A, et al. Hydroureteronephrosis due to loss of Sox9-regulated smooth muscle cell differentiation of the ureteric mesenchyme. *Hum Mol Genet.* 2010;19(24):4918-4929.
157. Hood RL, Lines MA, Nikkel SM, et al. Mutations in SRCAP, encoding SNF2-related CREBBP activator protein, cause Floating-Harbor syndrome. *Am J Hum Genet.* 2012;90(2):308-313.
158. Kujat A, Schulz MD, Streng S, Froster UG. Renal malformations in deletion 22q11.2 patients. *Am J Med Genet A.* 2006;140(14):1601-1602.
159. Meneghini V, Odent S, Platonova N, Egeo A, Merlo GR. Novel TBX3 mutation data in families with ulnar-mammary syndrome indicate a genotype-phenotype relationship: mutations that do not disrupt the T-domain are associated with less severe limb defects. *Eur J Med Genet.* 2006;49(2):151-158.
160. Milunsky JM, Maher TA, Zhao G, et al. TFAP2A mutations result in branchio-oculo-facial syndrome. *Am J Hum Genet.* 2008;82(5):1171-1177.
161. Celli J, Duijf P, Hamel BC, et al. Heterozygous germline mutations in the p53 homolog p63 are the cause of EEC syndrome. *Cell.* 1999;99(2):143-153.
162. Curatolo P, Bombardieri R, Jozwiak S. Tuberous sclerosis. *Lancet.* 2008;372(9639):657-668.
163. Kumar A, Wolpert C, Kandt RS, et al. A de novo frame-shift mutation in the tuberlin gene. *Hum Mol Genet.* 1995;4(8):1471-1472.
164. Stevens CA, Sargent LA. Ablepharon-macrostomia syndrome. *Am J Med Genet.* 2002;107(1):30-37.
165. Bartsch O, Kirmes I, Thiede A, et al. Novel VANGL1 Gene Mutations in 144 Slovakian, Romanian and German Patients with Neural Tube Defects. *Mol Syndromol.* 2012;3(2):76-81.
166. Roifman M, Marcelis CL, Paton T, et al. De novo WNT5A-associated autosomal dominant Robinow syndrome suggests specificity of genotype and phenotype. *Clin Genet.* 2015;87(1):34-41.
167. Person AD, Beiraghi S, Sieben CM, et al. WNT5A mutations in patients with autosomal dominant Robinow syndrome. *Dev Dyn.* 2010;239(1):327-337.

168. Pellegrino JE, McDonald-McGinn DM, Schneider A, Markowitz RI, Zackai EH. Further clinical delineation and increased morbidity in males with osteopathia striata with cranial sclerosis: an X-linked disorder? *Am J Med Genet.* 1997;70(2):159-165.
169. Ng D, Thakker N, Corcoran CM, et al. Oculofaciocardiodental and Lenz microphthalmia syndromes result from distinct classes of mutations in BCOR. *Nat Genet.* 2004;36(4):411-416.
170. McCauley J, Masand N, McGowan R, et al. X-linked VACTERL with hydrocephalus syndrome: further delineation of the phenotype caused by FANCB mutations. *Am J Med Genet A.* 2011;155A(10):2370-2380.
171. Robertson SP, Jenkins ZA, Morgan T, et al. Frontometaphyseal dysplasia: mutations in FLNA and phenotypic diversity. *Am J Med Genet A.* 2006;140(16):1726-1736.
172. Cottureau E, Mortemousque I, Moizard MP, et al. Phenotypic spectrum of Simpson-Golabi-Behmel syndrome in a series of 42 cases with a mutation in GPC3 and review of the literature. *Am J Med Genet C Semin Med Genet.* 2013;163C(2):92-105.
173. Hardelin JP, Levilliers J, del Castillo I, et al. X chromosome-linked Kallmann syndrome: stop mutations validate the candidate gene. *Proc Natl Acad Sci U S A.* 1992;89(17):8190-8194.
174. Jensen LR, Amende M, Gurok U, et al. Mutations in the JARID1C gene, which is involved in transcriptional regulation and chromatin remodeling, cause X-linked mental retardation. *Am J Hum Genet.* 2005;76(2):227-236.
175. Rosenberg CE, Daly T, Hung C, Hsueh I, Lindsley AW, Bodamer O. Prenatal and perinatal history in Kabuki Syndrome. *Am J Med Genet A.* 2020;182(1):85-92.
176. Preiksaitiene E, Krasovskaja N, Utkus A, et al. R368X mutation in MID1 among recurrent mutations in patients with X-linked Opitz G/BBB syndrome. *Clin Dysmorphol.* 2015;24(1):7-12.
177. Konig A, Happel R, Fink-Puches R, et al. A novel missense mutation of NSDHL in an unusual case of CHILD syndrome showing bilateral, almost symmetric involvement. *J Am Acad Dermatol.* 2002;46(4):594-596.
178. Johnston JJ, Gropman AL, Sapp JC, et al. The phenotype of a germline mutation in PIGA: the gene somatically mutated in paroxysmal nocturnal hemoglobinuria. *Am J Hum Genet.* 2012;90(2):295-300.
179. Suskan E, Kurkcuoglu N, Uluoglu O. Focal dermal hypoplasia (Goltz syndrome) with horseshoe kidney abnormality. *Pediatr Dermatol.* 1990;7(4):283-286.
180. Deardorff MA, Noon SE, Krantz ID. Cornelia de Lange Syndrome. In: Adam MP, Ardinger HH, Pagon RA, et al., editors. *GeneReviews*((R)). Seattle (WA): University of Washington, Seattle; University of Washington, Seattle. *GeneReviews* is a registered trademark of the University of Washington, Seattle. All rights reserved.; 1993.
181. Lynch SA, Nguyen LS, Ng LY, Waldron M, McDonald D, Gecz J. Broadening the phenotype associated with mutations in UPF3B: two further cases with renal dysplasia and variable developmental delay. *Eur J Med Genet.* 2012;55(8-9):476-479.
182. Chung B, Shaffer LG, Keating S, Johnson J, Casey B, Chitayat D. From VACTERL-H to heterotaxy: variable expressivity of ZIC3-related disorders. *Am J Med Genet A.* 2011;155A(5):1123-1128.
183. Parisi MA, Doherty D, Eckert ML, et al. AHI1 mutations cause both retinal dystrophy and renal cystic disease in Joubert syndrome. *J Med Genet.* 2006;43(4):334-339.
184. Pretorius PR, Baye LM, Nishimura DY, et al. Identification and functional analysis of the vision-specific BBS3 (ARL6) long isoform. *PLoS Genet.* 2010;6(3):e1000884.
185. Tieder M, Levy M, Gubler MC, Gagnadoux MF, Broyer M. Renal abnormalities in the Bardet-Biedl syndrome. *Int J Pediatr Nephrol.* 1982;3(3):199-203.
186. Valente EM, Silhavy JL, Brancati F, et al. Mutations in CEP290, which encodes a centrosomal protein, cause pleiotropic forms of Joubert syndrome. *Nat Genet.* 2006;38(6):623-625.
187. Cleper R, Kauschansky A, Varsano I, Frydman M. Varadi syndrome (OFD VI) or Opitz trigonocephaly syndrome: overlapping manifestations in two cousins. *Am J Med Genet.* 1993;47(4):451-455.
188. Moudgil A, Bagga A, Kamil ES, et al. Nephronophthisis associated with Ellis-van Creveld syndrome. *Pediatr Nephrol.* 1998;12(1):20-22.
189. Kurian K, Shanmugam S, Harsh Vardah T, Gupta S. Chondroectodermal dysplasia (Ellis van Creveld syndrome): a report of three cases with review of literature. *Indian J Dent Res.* 2007;18(1):31-34.
190. Attanasio M, Uhlenhaut NH, Sousa VH, et al. Loss of GLIS2 causes nephronophthisis in humans and mice by increased apoptosis and fibrosis. *Nat Genet.* 2007;39(8):1018-1024.

191. Friedland-Little JM, Hoffmann AD, Ocbina PJ, et al. A novel murine allele of Intraflagellar Transport Protein 172 causes a syndrome including VACTERL-like features with hydrocephalus. *Hum Mol Genet.* 2011;20(19):3725-3737.
192. Schaefer E, Stoetzel C, Scheidecker S, et al. Identification of a novel mutation confirms the implication of IFT172 (BBS20) in Bardet-Biedl syndrome. *J Hum Genet.* 2016;61(5):447-450.
193. Walczak-Sztulpa J, Wawrocka A, Sobierajewicz A, et al. Intrafamilial phenotypic variability in a Polish family with Sensenbrenner syndrome and biallelic WDR35 mutations. *Am J Med Genet A.* 2017;173(5):1364-1368.
194. Dupont MA, Humbert C, Huber C, et al. Human IFT52 mutations uncover a novel role for the protein in microtubule dynamics and centrosome cohesion. *Hum Mol Genet.* 2019;28(16):2720-2737.
195. Bruel AL, Franco B, Duffourd Y, et al. Fifteen years of research on oral-facial-digital syndromes: from 1 to 16 causal genes. *J Med Genet.* 2017;54(6):371-380.
196. Cevik S, Sanders AA, Van Wijk E, et al. Active transport and diffusion barriers restrict Joubert Syndrome-associated ARL13B/ARL-13 to an Inv-like ciliary membrane subdomain. *PLoS Genet.* 2013;9(12):e1003977.
197. Beales PL, Bland E, Tobin JL, et al. IFT80, which encodes a conserved intraflagellar transport protein, is mutated in Jeune asphyxiating thoracic dystrophy. *Nat Genet.* 2007;39(6):727-729.
198. Perrault I, Halbritter J, Porath JD, et al. IFT81, encoding an IFT-B core protein, as a very rare cause of a ciliopathy phenotype. *J Med Genet.* 2015;52(10):657-665.
199. Travaglini L, Brancati F, Silhavy J, et al. Phenotypic spectrum and prevalence of INPP5E mutations in Joubert syndrome and related disorders. *Eur J Hum Genet.* 2013;21(10):1074-1078.
200. Otto EA, Schermer B, Obara T, et al. Mutations in INVS encoding inversin cause nephronophthisis type 2, linking renal cystic disease to the function of primary cilia and left-right axis determination. *Nat Genet.* 2003;34(4):413-420.
201. Filges I, Nosova E, Bruder E, et al. Exome sequencing identifies mutations in KIF14 as a novel cause of an autosomal recessive lethal fetal ciliopathy phenotype. *Clin Genet.* 2014;86(3):220-228.
202. Yamamura T, Morisada N, Nozu K, et al. Rare renal ciliopathies in non-consanguineous families that were identified by targeted resequencing. *Clin Exp Nephrol.* 2017;21(1):136-142.
203. Kyttala M, Tallila J, Salonen R, et al. MKS1, encoding a component of the flagellar apparatus basal body proteome, is mutated in Meckel syndrome. *Nat Genet.* 2006;38(2):155-157.
204. Baala L, Romano S, Khaddour R, et al. The Meckel-Gruber syndrome gene, MKS3, is mutated in Joubert syndrome. *Am J Hum Genet.* 2007;80(1):186-194.
205. Kumar S, Rankin R. Renal insufficiency is a component of COACH syndrome. *Am J Med Genet.* 1996;61(2):122-126.
206. Thiel C, Kessler K, Giessl A, et al. NEK1 mutations cause short-rib polydactyly syndrome type majewski. *Am J Hum Genet.* 2011;88(1):106-114.
207. Hildebrandt F, Otto E, Rensing C, et al. A novel gene encoding an SH3 domain protein is mutated in nephronophthisis type 1. *Nat Genet.* 1997;17(2):149-153.
208. Olbrich H, Fliegauf M, Hoefele J, et al. Mutations in a novel gene, NPHP3, cause adolescent nephronophthisis, tapeto-retinal degeneration and hepatic fibrosis. *Nat Genet.* 2003;34(4):455-459.
209. Otto E, Hoefele J, Ruf R, et al. A gene mutated in nephronophthisis and retinitis pigmentosa encodes a novel protein, nephroretinin, conserved in evolution. *Am J Hum Genet.* 2002;71(5):1161-1167.
210. Bergmann C, Senderek J, Windelen E, et al. Clinical consequences of PKHD1 mutations in 164 patients with autosomal-recessive polycystic kidney disease (ARPKD). *Kidney Int.* 2005;67(3):829-848.
211. Suzuki T, Miyake N, Tsurusaki Y, et al. Molecular genetic analysis of 30 families with Joubert syndrome. *Clin Genet.* 2016;90(6):526-535.
212. Airik R, Slaats GG, Guo Z, et al. Renal-retinal ciliopathy gene Sdccag8 regulates DNA damage response signaling. *J Am Soc Nephrol.* 2014;25(11):2573-2583.
213. Edvardson S, Shaag A, Zenvirt S, et al. Joubert syndrome 2 (JBTS2) in Ashkenazi Jews is associated with a TMEM216 mutation. *Am J Hum Genet.* 2010;86(1):93-97.
214. Shaheen R, Ansari S, Mardawi EA, Alshammari MJ, Alkuraya FS. Mutations in TMEM231 cause Meckel-Gruber syndrome. *J Med Genet.* 2013;50(3):160-162.
215. Huang L, Szymanska K, Jensen VL, et al. TMEM237 is mutated in individuals with a Joubert syndrome related disorder and expands the role of the TMEM family at the ciliary transition zone. *Am J Hum Genet.* 2011;89(6):713-730.



216. Chiang AP, Beck JS, Yen HJ, et al. Homozygosity mapping with SNP arrays identifies TRIM32, an E3 ubiquitin ligase, as a Bardet-Biedl syndrome gene (BBS11). *Proc Natl Acad Sci U S A*. 2006;103(16):6287-6292.
217. Davis EE, Zhang Q, Liu Q, et al. TTC21B contributes both causal and modifying alleles across the ciliopathy spectrum. *Nat Genet*. 2011;43(3):189-196.
218. Kraus MR, Clauin S, Pfister Y, et al. Two mutations in human BICC1 resulting in Wnt pathway hyperactivity associated with cystic renal dysplasia. *Hum Mutat*. 2012;33(1):86-90.
219. Rossetti S, Consugar MB, Chapman AB, et al. Comprehensive molecular diagnostics in autosomal dominant polycystic kidney disease. *J Am Soc Nephrol*. 2007;18(7):2143-2160.
220. Hart TC, Gorry MC, Hart PS, et al. Mutations of the UMOD gene are responsible for medullary cystic kidney disease 2 and familial juvenile hyperuricaemic nephropathy. *J Med Genet*. 2002;39(12):882-892.
221. Bisschoff IJ, Zeschnigk C, Horn D, et al. Novel mutations including deletions of the entire OFD1 gene in 30 families with type 1 orofaciocigital syndrome: a study of the extensive clinical variability. *Hum Mutat*. 2013;34(1):237-247.
222. Slaney SF, Oldridge M, Hurst JA, et al. Differential effects of FGFR2 mutations on syndactyly and cleft palate in Apert syndrome. *Am J Hum Genet*. 1996;58(5):923-932.
223. Devuyst O, Olinger E, Weber S, et al. Autosomal dominant tubulointerstitial kidney disease. *Nat Rev Dis Primers*. 2019;5(1):60.
224. Spruijt L, Hoefsloot LH, van Schaijk GH, et al. Identification of a novel EYA1 mutation presenting in a newborn with laryngomalacia, glossoptosis, retrognathia, and pectus excavatum. *Am J Med Genet A*. 2006;140(12):1343-1345.
225. De Tomasi L, David P, Humbert C, et al. Mutations in GREB1L Cause Bilateral Kidney Agenesis in Humans and Mice. *Am J Hum Genet*. 2017;101(5):803-814.
226. Weber S, Moriniere V, Knuppel T, et al. Prevalence of mutations in renal developmental genes in children with renal hypodysplasia: results of the ESCAPE study. *J Am Soc Nephrol*. 2006;17(10):2864-2870.
227. Slavotinek A, Risolino M, Losa M, et al. De novo, deleterious sequence variants that alter the transcriptional activity of the homeoprotein PBX1 are associated with intellectual disability and pleiotropic developmental defects. *Hum Mol Genet*. 2017;26(24):4849-4860.
228. Chen HJ, Romigh T, Sesock K, Eng C. Characterization of cryptic splicing in germline PTEN intronic variants in Cowden syndrome. *Hum Mutat*. 2017;38(10):1372-1377.
229. Zenker M, Voss E, Reis A. Mild variable Noonan syndrome in a family with a novel PTPN11 mutation. *Eur J Med Genet*. 2007;50(1):43-47.
230. Sarkozy A, Conti E, Seripa D, et al. Correlation between PTPN11 gene mutations and congenital heart defects in Noonan and LEOPARD syndromes. *J Med Genet*. 2003;40(9):704-708.
231. Blanck C, Kohlhase J, Engels S, et al. Three novel SALL1 mutations extend the mutational spectrum in Townes-Brocks syndrome. *J Med Genet*. 2000;37(4):303-307.
232. Nicolaou N, Pulit SL, Nijman IJ, et al. Prioritization and burden analysis of rare variants in 208 candidate genes suggest they do not play a major role in CAKUT. *Kidney Int*. 2016;89(2):476-486.
233. Monies D, Abouelhoda M, Assoum M, et al. Lessons Learned from Large-Scale, First-Tier Clinical Exome Sequencing in a Highly Consanguineous Population. *Am J Hum Genet*. 2019;104(6):1182-1201.
234. Katsanis N, Eichers ER, Ansley SJ, et al. BBS4 is a minor contributor to Bardet-Biedl syndrome and may also participate in triallelic inheritance. *Am J Hum Genet*. 2002;71(1):22-29.
235. Dulfer E, Hoefsloot LH, Timmer A, Mom C, van Essen AJ. Two sibs with Bardet-Biedl syndrome due to mutations in BBS12: no clues for modulation by a third mutation in BBS10. *Am J Med Genet A*. 2010;152A(10):2666-2669.
236. Rossetti S, Strmecki L, Gamble V, et al. Mutation analysis of the entire PKD1 gene: genetic and diagnostic implications. *Am J Hum Genet*. 2001;68(1):46-63.
237. Garcia-Gonzalez MA, Jones JG, Allen SK, et al. Evaluating the clinical utility of a molecular genetic test for polycystic kidney disease. *Mol Genet Metab*. 2007;92(1-2):160-167.
238. Veldhuisen B, Saris JJ, de Haij S, et al. A spectrum of mutations in the second gene for autosomal dominant polycystic kidney disease (PKD2). *Am J Hum Genet*. 1997;61(3):547-555.
239. Monies D, Abouelhoda M, AlSayed M, et al. The landscape of genetic diseases in Saudi Arabia based on the first 1000 diagnostic panels and exomes. *Hum Genet*. 2017;136(8):921-939.
